# Supplementary material
Source: publisher figshare collection journal article supplement (https://acs.figshare.com/ndownloader/files/12500246)

## **Supporting Information**

### **Domino Synthesis of 2,3-Dialkylidenetetrahydrofurans via Tandem Prins Cyclization/Skeletal Reorganization**

**Mizuki Kato and Akio Saito\***

## **Table of contents**

|                                                                                                                                                                                                 |     |
|-------------------------------------------------------------------------------------------------------------------------------------------------------------------------------------------------|-----|
| Evaluation of acids and additives for the formation of <b>3aa</b> (Table S-1).....                                                                                                              | S2  |
| Other control experiments (Scheme S-1, S-2).....                                                                                                                                                | S3  |
| General information.....                                                                                                                                                                        | S3  |
| Preparation and Characterization of 3,5-Diynols <b>1c-e</b> .....                                                                                                                               | S4  |
| Domino Synthesis of 2,3-Dialkylidenetetrahydrofurans <b>3</b> and Characterization of <b>3</b> and <b>4da</b> .....                                                                             | S4  |
| Preparation and Characterization of 4-En-1-yn-3-ones <b>4aa</b> , <b>4aj</b> or <b>4ak</b> .....                                                                                                | S7  |
| Preparation of 2,3-Dialkylidenetetrahydrofuran <b>3aa</b> from 4-En-1-yn-3-one <b>4aa</b> .....                                                                                                 | S8  |
| Preparation and Characterization of Dihydrobenzofuran <b>5</b> .....                                                                                                                            | S8  |
| Preparation and Characterization of 4-En-1-yn-3-one <b>8</b> .....                                                                                                                              | S8  |
| 2D NMR spectra of Product <b>3aa</b> , <b>4aa</b> and <b>8</b> .....                                                                                                                            | S10 |
| <sup>1</sup> H and <sup>13</sup> C NMR spectra of new compounds <b>1c-e</b> , <b>3aa-3al</b> , <b>3ba-3ga</b> , <b>4da</b> , <b>4aa</b> , <b>4aj</b> , <b>4ak</b> , <b>5</b> and <b>8</b> ..... | S16 |

## Evaluation of acids and additives for the formation of **3aa**

As shown in Table S-1, acids and additives were evaluated for the domino reaction of 3,5-diynol **1a** and benzaldehyde (**2a**) in dichloromethane (DCM). Initially, it turned out that the catalytic amounts of acids brought about the low conversion to the desired furans **3aa** at room temperature (up to 15% yields, entries 1–3 and 5). Even under catalytic conditions, the reaction temperatures were raised in dichloroethane to give the complex mixture (entries 4 and 6). Also, iodine reagents such as “IBF<sub>4</sub>”<sup>1</sup> and molecular iodine,<sup>2</sup> which worked well in the Prins cyclization and its related reaction, afforded the complex mixture (entries 7–9). On the other hand, when one equivalent of TMSOTf, HOTf and HBF<sub>4</sub>·OEt<sub>2</sub> were used, the furans **3aa** were obtained in 17–25% yields at room temperature for 8 h (entries 10–12). Furthermore, the addition of methanol (1 equiv) with HBF<sub>4</sub>·OEt<sub>2</sub> (1 equiv) showed better result, in which the yield of **3aa** was improved up to 37% (entry 15). Unfortunately, the reaction with an increased amount of methanol (2 or 5 equiv) was sluggish (entry 16 or 17). In contrast, increasing the amounts of both methanol and HBF<sub>4</sub>·OEt<sub>2</sub> by 1 equiv led to good conversion to **3aa** (entries 18 and 19), and finally, the use of 3 equiv each afforded **3aa** in high yield (80%, entry 19). Notably, compared with other alcohols (entries 21–23) and H<sub>2</sub>O (entry 24), methanol was found out to be the best additive (entry 19). Furthermore, the present reaction could be successfully scaled up (**1a**: 5 mmol, entry 25).

**Table S-1.** Evaluation of acids and additives for the formation of **3aa**

| entry           | <b>2a</b> (equiv) | Acid (equiv)                             | Additive (equiv)                         | Temp. / (h) | <b>3aa</b> (%) <sup>a</sup> | <b>1a</b> (%) <sup>a</sup> |
|-----------------|-------------------|------------------------------------------|------------------------------------------|-------------|-----------------------------|----------------------------|
| 1               | 1.2               | BF <sub>3</sub> ·OEt <sub>2</sub> (0.2)  |                                          | rt / 24     | 2                           | 87                         |
| 2               | 1.2               | TfOH (0.2)                               |                                          | rt / 24     | 6                           | 56                         |
| 3               | 1.2               | HBF <sub>4</sub> ·OEt <sub>2</sub> (0.2) |                                          | rt / 24     | 4                           | 93                         |
| 4 <sup>b</sup>  | 1.2               | HBF <sub>4</sub> ·OEt <sub>2</sub> (0.2) |                                          | 90 °C / 24  | 0                           | 27                         |
| 5               | 2                 | TMSOTf (0.2)                             |                                          | rt / 24     | 15                          | 48                         |
| 6 <sup>b</sup>  | 2                 | Yb(OTf) <sub>3</sub> (0.2)               |                                          | 60 °C / 24  | 0                           | 69                         |
| 7               | 2                 | IPy <sub>2</sub> BF <sub>4</sub> (0.2)   | HBF <sub>4</sub> ·OEt <sub>2</sub> (0.4) | rt / 24     | 0                           | 75                         |
| 8               | 2                 | I <sub>2</sub> (0.2)                     | AgBF <sub>4</sub> (0.2)                  | rt / 24     | 0                           | 64                         |
| 9               | 2                 | I <sub>2</sub> (1)                       |                                          | rt / 24     | 0                           | 29                         |
| 10              | 2                 | TMSOTf (1)                               |                                          | rt / 8      | 17                          | 6                          |
| 11              | 2                 | HOTf (1)                                 |                                          | rt / 8      | 21                          | 6                          |
| 12              | 2                 | HBF <sub>4</sub> ·OEt <sub>2</sub> (1)   |                                          | rt / 8      | 25                          | 27                         |
| 13              | 5                 | HBF <sub>4</sub> ·OEt <sub>2</sub> (1)   |                                          | rt / 24     | 25                          | 12                         |
| 14              | 10                | HBF <sub>4</sub> ·OEt <sub>2</sub> (1)   |                                          | rt / 24     | 21                          | 0                          |
| 15              | 2                 | HBF <sub>4</sub> ·OEt <sub>2</sub> (1)   | MeOH (1)                                 | rt / 8      | 37                          | 46                         |
| 16              | 2                 | HBF <sub>4</sub> ·OEt <sub>2</sub> (1)   | MeOH (2)                                 | rt / 8      | 21                          | 79                         |
| 17              | 2                 | HBF <sub>4</sub> ·OEt <sub>2</sub> (1)   | MeOH (5)                                 | rt / 8      | 0                           | 100                        |
| 18              | 2                 | HBF <sub>4</sub> ·OEt <sub>2</sub> (2)   | MeOH (2)                                 | rt / 8      | 66                          | 25                         |
| 19              | 2                 | HBF <sub>4</sub> ·OEt <sub>2</sub> (3)   | MeOH (3)                                 | rt / 8      | 80 <sup>c</sup>             | 0                          |
| 20              | 2                 | TMSOTf (3)                               | MeOH (3)                                 | rt / 8      | 10                          | 55                         |
| 21              | 2                 | HBF <sub>4</sub> ·OEt <sub>2</sub> (3)   | EtOH (3)                                 | rt / 8      | 62 <sup>c</sup>             | 0                          |
| 22              | 2                 | HBF <sub>4</sub> ·OEt <sub>2</sub> (3)   | <i>i</i> -PrOH (3)                       | rt / 8      | 57 <sup>c</sup>             | 0                          |
| 23              | 2                 | HBF <sub>4</sub> ·OEt <sub>2</sub> (3)   | <i>t</i> -BuOH (3)                       | rt / 8      | trace                       | trace                      |
| 24              | 2                 | HBF <sub>4</sub> ·OEt <sub>2</sub> (3)   | H <sub>2</sub> O (3)                     | rt / 8      | 25                          | 3                          |
| 25 <sup>d</sup> | 2                 | HBF <sub>4</sub> ·OEt <sub>2</sub> (3)   | MeOH (3)                                 | rt / 8      | 81 <sup>c</sup>             | 0                          |

<sup>a</sup> Values were determined by <sup>1</sup>H NMR. <sup>b</sup> Solvent: 1,2-dichloroethane. <sup>c</sup> Isolated yield.

<sup>d</sup> As a example of scale-up reaction, 5 mmol of **1a** was used.

<sup>1</sup> K. Murai, K. Tateishi, A. Saito, *Org. Biomol. Chem.* **2016**, *14*, 10352–10356.

<sup>2</sup> J. S. Yadav, B. V. Subba Reddy, G. G. K. S. Narayana Kumar, T. Swamy, *Tetrahedron Lett.* **2007**, *48*, 2205–2208.

## Other control experiments

As the alternative formation path of 4-en-1-yn-3-ones **4**, the Aldol-type reaction of vinyl ethers **6** derived from 3,5-diynols **1** (Scheme S-1) and methanol or alkyn-carbonyl metathesis reaction<sup>3</sup> such as the conversion of diyne **7** with aldehyde **2a** to 4-en-1-yn-3-one **8** (Scheme S-2) would be presumed. However, since treatment of **1a** with methanol in the presence of  $\text{HBF}_4 \cdot \text{OEt}_2$  led to no conversion of **1a** under the optimum conditions, we believe that vinyl ether **6** is not involved as an intermediate. On the other hand, regardless of the presence or absence of methanol, diyne **7** having no hydroxy group was exposed with **2a** in the presence of  $\text{HBF}_4 \cdot \text{OEt}_2$  to give **8** (Scheme S-2). However, compared to **4aa**, the products **8** were obtained lower yields. Considering that hydroxyethyl group-binding alkyne site exclusively underwent the reaction with aldehydes irrespective of the type of  $\text{R}^1$  group ( $\text{R}^1 = \text{aryl}$  or  $n$ -butyl, Scheme 3 in the text), the hydroxy groups in the substrates are essential for the formation of 4-en-1-yn-3-ones under the optimum conditions. Thus, 4-en-1-yn-3-ones **4** would be obtained mainly through Prins-type cyclization.

**Scheme S-1.** No conversion of **1a** to **6a** under the optimum conditions

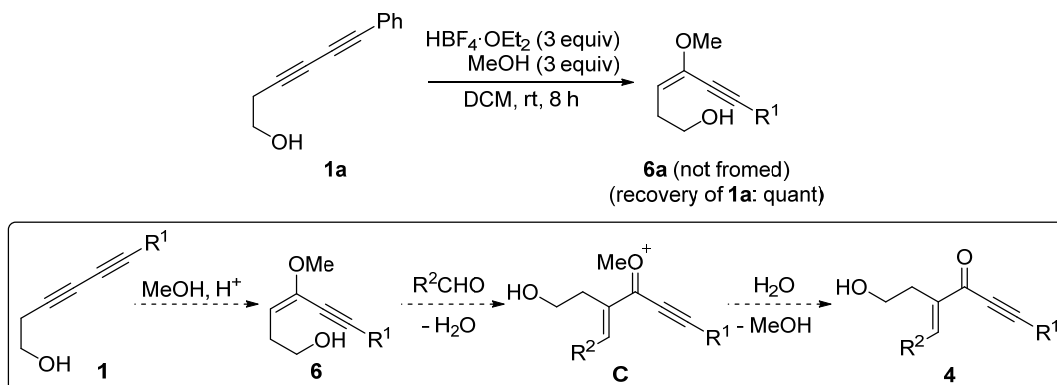

**Scheme S-2.** No conversion of **7** and **2a** to **8** under the optimum conditions

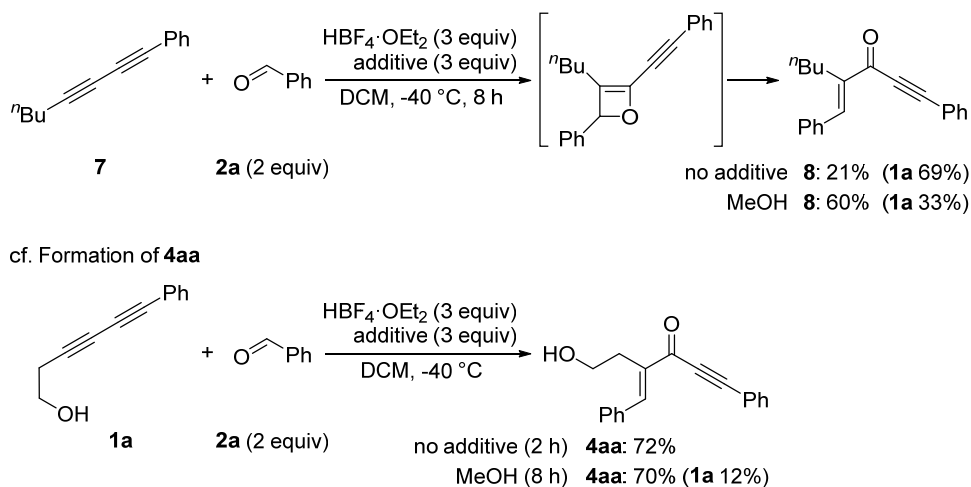

## General information

All reactions were carried out under an argon atmosphere. 3,5-Diynols **1a**,<sup>4</sup> **1b**,<sup>4</sup> **1f**,<sup>5</sup> and **1g**<sup>6</sup> were prepared by the method reported in the literatures. Tetrafluoroboric acid diethyl ether complex and aldehydes **2a-l** are commercially available. Dichloromethane and methanol were purchased as the “anhydrous” and used without further purification. Column chromatography was performed on silica gel 60N (63–200  $\mu\text{m}$ , neutral, Kanto Kagaku Co., Ltd.). Preparative thin layer chromatography (PTLC) was carried out using Wakogel B-5F.  $^1\text{H}$  and  $^{13}\text{C}$  NMR spectra were measured at 500 (or 300) and 125 (or 75) MHz in  $\text{CDCl}_3$ , and the chemical shifts are given in ppm using  $\text{CHCl}_3$  (7.26 ppm) in  $\text{CDCl}_3$  for  $^1\text{H}$  NMR and  $\text{CDCl}_3$  (77.0 ppm) for  $^{13}\text{C}$  NMR as an internal standard, respectively. Splitting patterns of an apparent multiplet associated with an averaged coupling constant were designed as s (singlet), d (doublet), t (triplet), q (quartet), m (multiplet), and br (broadened). Mass spectra and HRMS were recorded on double-focusing magnetic sector by FAB methods.

<sup>3</sup> Review: A. Saito, K. Tateishi, *Heterocycles* **2016**, 92, 607–630.

<sup>4</sup> H.-F. Jiang, A.-Z. Wang, *Synthesis* **2007**, 11, 1649–1654.

<sup>5</sup> S. Wang, Y. Li, H. Liu, J. Li, T. Li, Y. Wu, S. Okada, H. Nakanishi, *Org. Biomol. Chem.* **2015**, 13, 5467–5474.

<sup>6</sup> S. H. Kang, K. S. Jang, P. Theato, R. Zentel, J. Y. Chang, *Macromolecules* **2007**, 40, 8349–8354.

## Preparation and Characterization of 3,5-Diynols 1c-e

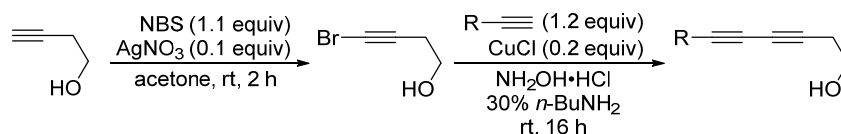

In a light-shielded flask, a solution of 3-butyn-1-ol (0.91 mL, 12 mmol), *N*-bromosuccinimide (2.35 g, 13.2 mmol) and AgNO<sub>3</sub> (0.20 g, 1.2 mmol) in acetone (40 mL) was stirred at room temperature for 2 h. After the solvent is distilled off under reduced pressure, the residue was extracted with Et<sub>2</sub>O. The extraction solvent was concentrated in vacuo to give 4-bromo-3-butyn-1-ol (1.76 g, 98%).<sup>7</sup>

CuCl (0.20 mg, 2.0 mmol) was added to a 30% *n*-BuNH<sub>2</sub> (20 mL) aqueous solution at room temperature. And then, until the resulting blue solution became colorless, hydroxylamine hydrochloride were added. After the solution was cooled to 0 °C, 3-ethynylanisole (1.32 g, 10 mmol), 2-ethynylanisole<sup>8</sup> (1.32 g, 10 mmol) or 4-ethynyltoluene (1.16 g, 10 mmol) was added, thereby forming in a yellow acetylide suspension. Subsequently, 4-bromo-3-butyn-1-ol (1.76 g, 11.8 mmol) was added at same temperature. After being stirred at room temperature for 16 h, the reaction mixture was extracted with Et<sub>2</sub>O. The organic layer was washed with sat. NH<sub>4</sub>Cl, dried over MgSO<sub>4</sub> and concentrated in vacuo to dryness. The residue was purified by silica gel column chromatography (hexane:AcOEt = 3:1) to give **1c**, **1d** or **1e**.

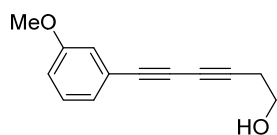

**6-(3-Methoxyphenyl)hexa-3,5-diyn-1-ol (1c):** 0.87 g (43%). Brown oil. IR (neat)  $\nu$  cm<sup>-1</sup>: 3370, 1228, 1042. <sup>1</sup>H NMR (300 MHz)  $\delta$  ppm; 1.84 (br.s, 1H), 2.64 (t, *J* = 6.3 Hz, 2H), 3.79 (s, 3H), 3.80 (t, *J* = 6.3 Hz, 2H), 6.91 (ddd, *J* = 8.1, 2.7, 1.2 Hz, 1H), 7.00 (dd, *J* = 2.7, 1.2 Hz, 1H), 7.08 (dt, *J* = 8.1, 1.2 Hz, 1H), 7.21 (t, *J* = 8.1 Hz, 1H). <sup>13</sup>C NMR (75 MHz)  $\delta$  ppm; 23.9, 55.2, 60.8, 66.8, 73.7, 75.3, 81.0, 115.9, 117.3, 122.8, 125.2, 129.6, 159.4. HRMS(FAB): *m/z* calcd. for C<sub>13</sub>H<sub>13</sub>O<sub>2</sub> [M + H] 201.0916; found 201.0903.

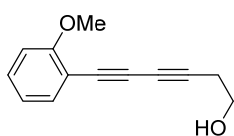

**6-(2-Methoxyphenyl)hexa-3,5-diyn-1-ol (1d):** 1.52 g (76%). Brown oil. IR (neat)  $\nu$  cm<sup>-1</sup>: 3370, 1245, 1162, 1044. <sup>1</sup>H NMR (300 MHz)  $\delta$  ppm; 1.87 (br.s, 1H), 2.64 (t, *J* = 6.0 Hz, 2H), 3.79 (t, *J* = 6.0 Hz, 2H), 3.87 (s, 3H), 6.82-6.98 (m, 2H), 7.31 (td, *J* = 7.5, 1.5 Hz, 1H), 7.43 (dd, *J* = 7.5, 1.5 Hz, 1H). <sup>13</sup>C NMR (75 MHz)  $\delta$  ppm; 24.0, 55.7, 60.7, 67.1, 71.8, 77.6, 81.5, 110.6, 110.9, 120.5, 130.6, 134.5, 161.6. HRMS(FAB): *m/z* calcd. for C<sub>13</sub>H<sub>13</sub>O<sub>2</sub> [M + H] 201.0916; found 201.0924.

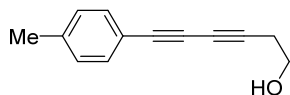

**6-(4-Methylphenyl)hexa-3,5-diyn-1-ol (1e):** 1.58 g (86%). Brown oil. IR (neat)  $\nu$  cm<sup>-1</sup>: 3369, 1044, 816. <sup>1</sup>H NMR (300 MHz)  $\delta$  ppm; 2.19 (br.s, 1H), 2.34 (s, 3H), 2.63 (t, *J* = 6.3 Hz, 2H), 3.79 (t, *J* = 6.3 Hz, 2H), 7.11 (d, *J* = 7.8 Hz, 2H), 7.37 (d, *J* = 7.8 Hz, 2H). <sup>13</sup>C NMR (75 MHz)  $\delta$  ppm; 21.4, 23.8, 60.7, 66.8, 73.3, 75.6, 80.6, 118.5, 129.2, 132.5, 139.5. HRMS(FAB): *m/z* calcd. for C<sub>13</sub>H<sub>13</sub>O [M + H] 185.0966; found 185.0943.

## Domino Synthesis of 2,3-Dialkylidenetetrahydrofurans 3 and Characterization of 3 and 4da

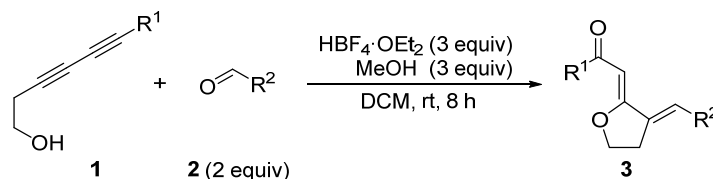

To a solution of 3,5-diynol **1** (0.4 mmol), aldehyde **2** (0.8 mmol) and methanol (48.6  $\mu$ L, 1.2 mmol) in dichloromethane (DCM, 2.5 mL) was added HBF<sub>4</sub>·OEt<sub>2</sub> (163.3  $\mu$ L, 1.2 mmol) at 0 °C. After being stirred at room temperature for 8 h, the reaction mixture was quenched with sat. NaHCO<sub>3</sub> and extracted with AcOEt. The organic layer was dried over MgSO<sub>4</sub> and concentrated in vacuo to dryness. The residue was purified by PTLC (hexane:AcOEt = 1:1) to give **3**.

**Scale-up preparation of 3aa:** According to the above procedure, **3aa** was prepared from **1a** (851 mg, 5 mmol), benzaldehyde (**2a**, 1.0 mL, 10 mmol), methanol (0.61 mL, 15 mmol) and HBF<sub>4</sub>·OEt<sub>2</sub> (2.0 mL, 15 mmol) in DCM (31 mL). After the purification by silica gel column chromatography (hexane:AcOEt = 3:1), **3aa** was obtained in the 81% yield (1.12 g, 4.05 mmol).

<sup>7</sup> A. H. Cherney, S. H. Reisman, *J. Am. Chem. Soc.* **2014**, 136, 14365–14368.

<sup>8</sup> M. Tsuji, *J. Org. Chem.* **2003**, 68, 9589–9597.

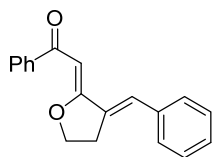

**(2Z)-2-[(E)-3-Benzylidenedihydrofuran-2(3H)-ylidene]-1-phenylethanone (3aa):**  $R_f$  = 0.25. 88.1 mg (80%). Yellow solid. MP: 116-118 °C. IR (KBr)  $\nu$   $\text{cm}^{-1}$ ; 3054, 1580, 1248, 1011.  $^1\text{H}$  NMR (500 MHz)  $\delta$  ppm; 3.11 (td,  $J$  = 7.5, 2.5 Hz, 2H), 4.62 (t,  $J$  = 7.5 Hz, 2H), 6.58 (s, 1H), 7.31 (t,  $J$  = 2.5 Hz, 1H), 7.36 (t,  $J$  = 7.0 Hz, 1H), 7.39-7.53 (m, 7H), 7.98 (d,  $J$  = 7.0 Hz, 2H).  $^{13}\text{C}$  NMR (125 MHz)  $\delta$  ppm; 29.0, 72.1, 90.4, 127.5, 127.6, 128.2, 128.76, 128.81, 129.4, 131.5, 134.2, 135.5, 140.3, 168.8, 188.3. HRMS(FAB):  $m/z$  calcd. for  $\text{C}_{19}\text{H}_{17}\text{O}_2$  [ $\text{M} + \text{H}$ ] 277.1229; found 277.1241.

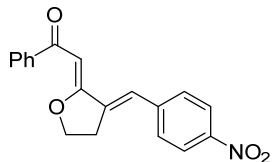

**(2Z)-2-[(E)-3-(4-Nitrobenzylidene)dihydrofuran-2(3H)-ylidene]-1-phenylethanone (3ab):**  $R_f$  = 0.27. 91.8 mg (71%). Yellow solid. MP: 172-174 °C. IR (KBr)  $\nu$   $\text{cm}^{-1}$ ; 3063, 1561, 1520, 1344, 1009.  $^1\text{H}$  NMR (500 MHz)  $\delta$  ppm; 3.15 (td,  $J$  = 7.5, 2.5 Hz, 2H), 4.66 (t,  $J$  = 7.5 Hz, 2H), 6.62 (s, 1H), 7.34 (t,  $J$  = 2.5 Hz, 1H), 7.46 (t,  $J$  = 7.5 Hz, 2H), 7.52 (tt,  $J$  = 7.5, 2.0 Hz, 1H), 7.61 (d,  $J$  = 8.5 Hz, 2H), 7.97 (dt,  $J$  = 7.5, 2.0 Hz, 2H), 8.29 (d,  $J$  = 8.5 Hz, 2H).  $^{13}\text{C}$  NMR (125 MHz)  $\delta$  ppm; 29.3, 72.0, 91.7, 124.1, 124.6, 127.7, 128.4, 129.8, 131.9, 138.8, 139.9, 141.8, 147.2, 167.3, 188.4. HRMS(FAB):  $m/z$  calcd. for  $\text{C}_{19}\text{H}_{16}\text{NO}_4$  [ $\text{M} + \text{H}$ ] 322.1079; found 322.1056.

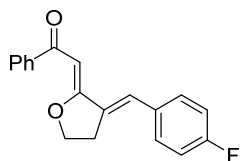

**(2Z)-2-[(E)-3-(4-Fluorobenzylidene)dihydrofuran-2(3H)-ylidene]-1-phenylethanone (3ac):**  $R_f$  = 0.19. 95.9 mg (81%). Yellow solid. MP: 114-116 °C. IR (KBr)  $\nu$   $\text{cm}^{-1}$ ; 3066, 1557, 1252, 1232, 1012.  $^1\text{H}$  NMR (500 MHz)  $\delta$  ppm; 3.08 (td,  $J$  = 7.5, 3.0 Hz, 2H), 4.63 (t,  $J$  = 7.5 Hz, 2H), 6.56 (s, 1H), 7.13 (t,  $J$  = 7.5 Hz, 2H), 7.27 (t,  $J$  = 3.0 Hz, 1H), 7.42-7.48 (m, 4H), 7.50 (tt,  $J$  = 7.5, 1.5 Hz, 1H), 7.97 (dt,  $J$  = 7.5, 1.5 Hz, 2H).  $^{13}\text{C}$  NMR (125 MHz)  $\delta$  ppm; 28.9, 72.1, 90.4, 115.9 (d,  $J$  = 22.6 Hz), 126.3, 127.7, 128.3, 131.2 (d,  $J$  = 8.3 Hz), 131.6, 131.8 (d,  $J$  = 3.6 Hz), 133.8, 140.3, 162.7 (d,  $J$  = 249.3 Hz), 168.6, 188.3. HRMS(FAB):  $m/z$  calcd. for  $\text{C}_{19}\text{H}_{16}\text{FO}_2$  [ $\text{M} + \text{H}$ ] 295.1134; found 295.1145.

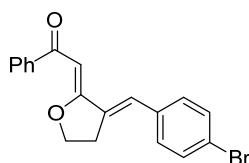

**(2Z)-2-[(E)-3-(4-Bromobenzylidene)dihydrofuran-2(3H)-ylidene]-1-phenylethanone (3ad):**  $R_f$  = 0.24. 112.1 mg (79%). Yellow solid. MP: 125-127 °C. IR (KBr)  $\nu$   $\text{cm}^{-1}$ ; 3057, 1561, 1249, 1008.  $^1\text{H}$  NMR (500 MHz)  $\delta$  ppm; 3.06 (td,  $J$  = 7.5, 2.5 Hz, 2H), 4.62 (t,  $J$  = 7.5 Hz, 2H), 6.56 (s, 1H), 7.22 (t,  $J$  = 2.5 Hz, 1H), 7.32 (d,  $J$  = 8.5 Hz, 2H), 7.44 (t,  $J$  = 7.5 Hz, 2H), 7.50 (tt,  $J$  = 7.5, 1.5 Hz, 1H), 7.55 (dt,  $J$  = 7.5, 1.5 Hz, 2H), 7.96 (d,  $J$  = 8.5 Hz, 2H).  $^{13}\text{C}$  NMR (125 MHz)  $\delta$  ppm; 29.0, 72.1, 90.7, 123.0, 126.1, 127.7, 128.3, 130.7, 131.6, 132.0, 134.4, 135.0, 140.2, 168.4, 188.3. HRMS(FAB):  $m/z$  calcd. for  $\text{C}_{19}\text{H}_{16}\text{BrO}_2$  [ $\text{M} + \text{H}$ ] 355.0334; found 355.0338.

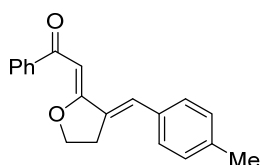

**(2Z)-2-[(E)-3-(4-Methylbenzylidene)dihydrofuran-2(3H)-ylidene]-1-phenylethanone (3ae):**  $R_f$  = 0.21. 87.8 mg (75%). Yellow solid. MP: 121-123 °C. IR (KBr)  $\nu$   $\text{cm}^{-1}$ ; 3022, 2919, 1557, 1252, 1011.  $^1\text{H}$  NMR (500 MHz)  $\delta$  ppm; 2.40 (s, 3H), 3.12 (td,  $J$  = 7.5, 2.0 Hz, 2H), 4.64 (t,  $J$  = 7.5 Hz, 2H), 6.56 (s, 1H), 7.25 (d,  $J$  = 8.0 Hz, 2H), 7.29 (t,  $J$  = 2.0 Hz, 1H), 7.38 (d,  $J$  = 8.0 Hz, 2H), 7.45 (t,  $J$  = 7.5 Hz, 2H), 7.50 (tt,  $J$  = 7.5, 2.0 Hz, 1H), 7.98 (dt,  $J$  = 7.5, 2.0 Hz, 2H).  $^{13}\text{C}$  NMR (125 MHz)  $\delta$  ppm; 21.3, 28.9, 72.1, 90.1, 127.5, 127.6, 128.2, 129.4, 129.5, 131.4, 132.7, 133.0, 139.1, 140.3, 169.1, 188.2. HRMS(FAB):  $m/z$  calcd. for  $\text{C}_{20}\text{H}_{19}\text{O}_2$  [ $\text{M} + \text{H}$ ] 291.1385; found 291.1400.

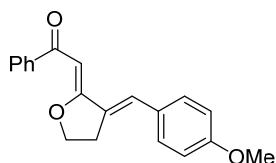

**(2Z)-2-[(E)-3-(4-Methoxybenzylidene)dihydrofuran-2(3H)-ylidene]-1-phenylethanone (3af):**  $R_f$  = 0.11. 29.4 mg (24%). Yellow amorphous. IR (neat)  $\nu$   $\text{cm}^{-1}$ ; 2968, 1511, 1252, 1173, 1028, 1010.  $^1\text{H}$  NMR (300 MHz)  $\delta$  ppm; 3.09 (td,  $J$  = 7.5, 2.4 Hz, 2H), 3.85 (s, 3H), 4.64 (t,  $J$  = 7.5 Hz, 2H), 6.54 (s, 1H), 6.96 (d,  $J$  = 8.4 Hz, 2H), 7.27 (t,  $J$  = 2.4 Hz, 1H), 7.39-7.55 (m, 5H), 7.98 (d,  $J$  = 8.4 Hz, 2H).  $^{13}\text{C}$  NMR (75 MHz)  $\delta$  ppm; 28.9, 55.3, 72.2, 89.9, 114.3, 127.4, 127.7, 128.31, 128.34, 131.2, 131.5, 131.6, 140.6, 160.2, 169.6, 188.4. HRMS(FAB):  $m/z$  calcd. for  $\text{C}_{20}\text{H}_{19}\text{O}_3$  [ $\text{M} + \text{H}$ ] 307.1334; found 307.1348.

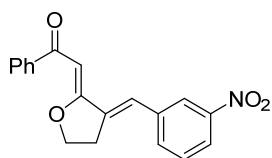

**(2Z)-2-[(E)-3-(3-Nitrobenzylidene)dihydrofuran-2(3H)-ylidene]-1-phenylethanone (3ag):**  $R_f$  = 0.12. 91.4 mg (71%). Yellow solid. MP: 142-144 °C. IR (KBr)  $\nu$   $\text{cm}^{-1}$ ; 3070, 1565, 1526, 1353, 1011.  $^1\text{H}$  NMR (500 MHz)  $\delta$  ppm; 3.18 (td,  $J$  = 7.5, 3.0 Hz, 2H), 4.68 (t,  $J$  = 7.5 Hz, 2H), 6.62 (s, 1H), 7.35 (t,  $J$  = 3.0 Hz, 1H), 7.45-7.50 (m, 2H), 7.51-7.56 (m, 1H), 7.63 (t,  $J$  = 8.0 Hz, 1H), 7.78 (d,  $J$  = 8.0 Hz, 1H), 7.99 (d,  $J$  = 8.0 Hz, 2H), 8.21 (dd,  $J$  = 8.0, 2.1 Hz, 1H), 8.34 (s, 1H).  $^{13}\text{C}$  NMR (125 MHz)  $\delta$  ppm; 28.9, 72.0, 91.2, 123.0, 123.5, 124.5, 127.6, 128.2, 129.7, 131.7, 134.8, 137.1, 137.4, 139.8, 148.3, 167.5, 188.2. HRMS(FAB):  $m/z$  calcd. for  $\text{C}_{19}\text{H}_{16}\text{NO}_4$  [ $\text{M} + \text{H}$ ] 322.1079; found 322.1062.

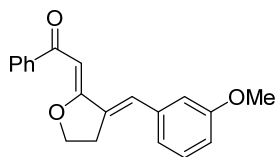

**(2Z)-2-[(E)-3-(3-Methoxybenzylidene)dihydrofuran-2(3H)-ylidene]-1-phenylethanone (3ah):**  $R_f = 0.18$ . 76.0 mg (62%). Brown amorphous. IR (neat)  $\nu$   $\text{cm}^{-1}$ : 2973, 1562, 1280, 1238, 1033, 1011.  $^1\text{H}$  NMR (500 MHz)  $\delta$  ppm: 3.13 (td,  $J = 7.5, 2.0$  Hz, 2H), 3.85 (s, 3H), 4.64 (t,  $J = 7.5$  Hz, 2H), 6.58 (s, 1H), 6.93 (dd,  $J = 8.0, 2.5$  Hz, 1H), 7.00 (t,  $J = 2.0$  Hz, 1H), 7.07 (d,  $J = 8.0$  Hz, 1H), 7.29 (t,  $J = 2.5$  Hz, 1H), 7.36 (t,  $J = 8.0$  Hz, 1H), 7.46 (td,  $J = 7.5, 1.5$  Hz, 2H), 7.51 (tt,  $J = 7.5, 1.5$  Hz, 1H), 7.99 (dt,  $J = 7.5, 1.5$  Hz, 2H).  $^{13}\text{C}$  NMR (125 MHz)  $\delta$  ppm: 29.1, 55.3, 72.2, 90.5, 114.3, 114.9, 121.9, 127.4, 127.7, 128.3, 129.8, 131.6, 134.5, 136.8, 140.3, 159.7, 168.7, 188.3. HRMS(FAB):  $m/z$  calcd. for  $\text{C}_{20}\text{H}_{19}\text{O}_3$  [ $\text{M} + \text{H}$ ] 307.1334; found 307.1320.

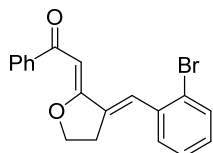

**(2Z)-2-[(E)-3-(2-Bromobenzylidene)dihydrofuran-2(3H)-ylidene]-1-phenylethanone (3ai):**  $R_f = 0.15$ . 98.2 mg (69%). Yellow solid. MP: 113–114 °C. IR (KBr)  $\nu$   $\text{cm}^{-1}$ : 30557, 1554, 1246, 1009.  $^1\text{H}$  NMR (500 MHz)  $\delta$  ppm: 3.02 (td,  $J = 7.5, 2.5$  Hz, 2H), 4.60 (t,  $J = 7.5$  Hz, 2H), 6.62 (s, 1H), 7.22 (td,  $J = 7.5, 1.5$  Hz, 1H), 7.37 (t,  $J = 2.5$  Hz, 1H), 7.42–7.49 (m, 3H), 7.52 (t,  $J = 7.0$  Hz, 2H), 7.66 (dd,  $J = 8.0, 1.5$  Hz, 1H), 7.99 (dt,  $J = 7.0, 1.5$  Hz, 2H).  $^{13}\text{C}$  NMR (125 MHz)  $\delta$  ppm: 28.8, 72.0, 91.2, 125.1, 126.3, 127.4, 127.7, 128.3, 129.5, 130.0, 131.7, 133.2, 135.4, 136.6, 140.1, 167.9, 188.4. HRMS(FAB):  $m/z$  calcd. for  $\text{C}_{19}\text{H}_{16}\text{BrO}_2$  [ $\text{M} + \text{H}$ ] 355.0334; found 355.0338.

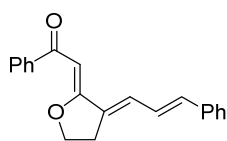

**(2Z)-2-[(E)-3-(E)-3-Phenylallylidene]dihydrofuran-2(3H)-ylidene]-1-phenylethanone (3aj):**  $R_f = 0.24$ . 51.3 mg (42%). Yellow amorphous. IR (KBr)  $\nu$   $\text{cm}^{-1}$ : 2974, 1556, 1233, 1017.  $^1\text{H}$  NMR (500 MHz)  $\delta$  ppm: 3.00 (td,  $J = 7.5, 2.5$  Hz, 2H), 4.64 (t,  $J = 7.5$  Hz, 2H), 6.50 (s, 1H), 6.84–6.96 (m, 2H), 7.05 (dt,  $J = 10.0, 2.5$  Hz, 1H), 7.31 (t,  $J = 7.0$  Hz, 1H), 7.37 (t,  $J = 7.5$  Hz, 2H), 7.44 (t,  $J = 7.5$  Hz, 2H), 7.46–7.52 (m, 3H), 7.96 (d,  $J = 7.5$  Hz, 2H).  $^{13}\text{C}$  NMR (125 MHz)  $\delta$  ppm: 27.2, 71.9, 90.5, 124.8, 127.0, 127.1, 127.6, 128.2, 128.8, 131.5, 134.8, 136.4, 138.3, 140.3, 167.8, 188.1. HRMS(FAB):  $m/z$  calcd. for  $\text{C}_{21}\text{H}_{19}\text{O}_2$  [ $\text{M} + \text{H}$ ] 303.1385; found 303.1379.

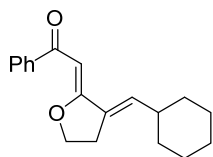

**(2Z)-2-[(E)-3-(cyclohexylmethylene)dihydrofuran-2(3H)-ylidene]-1-phenylethanone (3ak):**  $R_f = 0.30$ . 14.3 mg (13%). Yellow amorphous. IR (neat)  $\nu$   $\text{cm}^{-1}$ : 2926, 1584, 1228, 1016.  $^1\text{H}$  NMR (500 MHz)  $\delta$  ppm: 1.15–1.37 (m, 6H), 1.65–1.84 (m, 4H), 2.16–2.27 (m, 1H), 2.77 (td,  $J = 7.5, 2.5$  Hz, 2H), 4.56 (t,  $J = 7.5$  Hz, 2H), 6.25 (dt,  $J = 10.0, 2.5$  Hz, 1H), 6.36 (s, 1H), 7.42 (t,  $J = 7.5$  Hz, 3H), 7.47 (tt,  $J = 7.5, 2.0$  Hz, 1H), 7.93 (dt,  $J = 7.5, 2.4$  Hz, 2H).  $^{13}\text{C}$  NMR (125 MHz)  $\delta$  ppm: 25.6, 25.8, 26.4, 32.0, 39.9, 72.3, 89.7, 127.6, 128.2, 131.4, 132.5, 135.6, 140.4, 168.2, 188.3. HRMS(FAB):  $m/z$  calcd. for  $\text{C}_{19}\text{H}_{23}\text{O}_2$  [ $\text{M} + \text{H}$ ] 283.1698; found 283.1663.

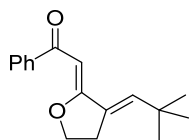

**(2Z)-2-[(E)-3-(2,2-Dimethylpropylidene)dihydrofuran-2(3H)-ylidene]-1-phenylethanone (3al):**  $R_f = 0.36$ . 61.9 mg (60%). Yellow amorphous. IR (neat)  $\nu$   $\text{cm}^{-1}$ : 2960, 1567, 1242, 1020.  $^1\text{H}$  NMR (500 MHz)  $\delta$  ppm: 1.20 (s, 9H), 2.89 (td,  $J = 7.5, 2.5$  Hz, 2H), 4.54 (t,  $J = 7.5$  Hz, 2H), 6.35 (s, 1H), 6.42 (t,  $J = 2.5$  Hz, 1H), 7.42 (t,  $J = 7.0$  Hz, 2H), 7.47 (t,  $J = 7.0$  Hz, 1H), 7.93 (d,  $J = 7.0$  Hz, 2H).  $^{13}\text{C}$  NMR (125 MHz)  $\delta$  ppm: 26.7, 29.8, 33.7, 72.2, 89.4, 127.6, 128.2, 131.2, 131.3, 139.9, 140.5, 169.7, 188.3. HRMS(FAB):  $m/z$  calcd. for  $\text{C}_{17}\text{H}_{21}\text{O}_2$  [ $\text{M} + \text{H}$ ] 257.1542; found 257.1579.

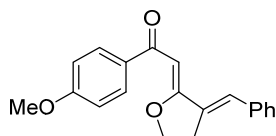

**(2Z)-2-[(E)-3-Benzylidenedihydrofuran-2(3H)-ylidene]-1-(4-methoxyphenyl)ethanone (3ba):**  $R_f = 0.19$ . 92.0 mg (75%). Brown amorphous. IR (neat)  $\nu$   $\text{cm}^{-1}$ : 2973, 1649, 1600, 1509, 1248, 1172, 1023.  $^1\text{H}$  NMR (500 MHz)  $\delta$  ppm: 3.11 (td,  $J = 7.5, 2.5$  Hz, 2H), 3.86 (s, 3H), 4.61 (t,  $J = 7.5$  Hz, 2H), 6.56 (s, 1H), 6.94 (d,  $J = 8.5$  Hz, 2H), 7.30 (t,  $J = 2.5$  Hz, 1H), 7.36 (tt,  $J = 7.5, 2.0$  Hz, 1H), 7.41–7.49 (m, 4H), 7.99 (d,  $J = 8.5$  Hz, 2H).  $^{13}\text{C}$  NMR (125 MHz)  $\delta$  ppm: 29.1, 55.4, 72.0, 90.3, 113.4, 127.1, 128.7, 128.8, 129.4, 129.8, 133.1, 134.3, 135.6, 162.4, 168.2, 187.1. HRMS(FAB):  $m/z$  calcd. for  $\text{C}_{20}\text{H}_{19}\text{O}_3$  [ $\text{M} + \text{H}$ ] 307.1334; found 307.1370.

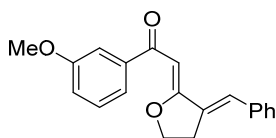

**(2Z)-2-[(E)-3-Benzylidenedihydrofuran-2(3H)-ylidene]-1-(3-methoxyphenyl)ethanone (3ca):**  $R_f = 0.19$ . 68.9 mg (56%). Brown amorphous. IR (neat)  $\nu$   $\text{cm}^{-1}$ : 2971, 1650, 1562, 1259, 1020.  $^1\text{H}$  NMR (500 MHz)  $\delta$  ppm: 3.12 (td,  $J = 7.5, 2.5$  Hz, 2H), 3.87 (s, 3H), 4.63 (t,  $J = 7.5$  Hz, 2H), 6.56 (s, 1H), 7.05 (ddd,  $J = 8.5, 3.0, 1.0$  Hz, 1H), 7.31 (t,  $J = 2.5$  Hz, 1H), 7.36 (t,  $J = 8.0$  Hz, 2H), 7.41–7.49 (m, 4H), 7.53 (dd,  $J = 3.0, 1.0$  Hz, 1H), 7.56 (dt,  $J = 8.5, 1.0$  Hz, 1H).  $^{13}\text{C}$  NMR (125 MHz)  $\delta$  ppm: 29.1, 55.4, 72.2, 90.5, 112.5, 117.7, 120.1, 127.6, 128.8, 128.9, 129.2, 129.4, 134.2, 135.5, 141.8, 159.6, 168.9, 188.0. HRMS(FAB):  $m/z$  calcd. for  $\text{C}_{20}\text{H}_{19}\text{O}_3$  [ $\text{M} + \text{H}$ ] 307.1334; found 307.1344.

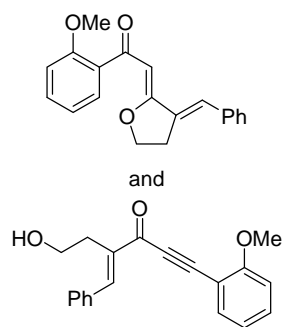

**(2Z)-2-[(E)-3-Benzylidenedihydrofuran-2(3H)-ylidene]-1-(3-methoxyphenyl)ethanone (3da):**  $R_f = 0.20$ . 46.1 mg (38%). Brown amorphous. IR (neat)  $\nu$   $\text{cm}^{-1}$ : 2973, 1598, 1243, 1023.  $^1\text{H}$  NMR (500 MHz)  $\delta$  ppm; 3.09 (td,  $J = 7.5, 2.5$  Hz, 2H), 3.90 (s, 3H), 4.58 (t,  $J = 7.5$  Hz, 2H), 6.53 (s, 1H), 6.95 (d,  $J = 9.0$  Hz, 1H), 7.00 (td,  $J = 7.5, 1.5$  Hz, 1H), 7.22 (t,  $J = 2.5$  Hz, 1H), 7.31-7.36 (m, 1H), 7.37-7.46 (m, 5H), 7.63 (dd,  $J = 7.5, 1.5$  Hz, 1H).  $^{13}\text{C}$  NMR (125 MHz)  $\delta$  ppm; 29.0, 55.8, 72.0, 95.4, 111.4, 120.7, 127.2, 128.65, 128.70, 129.3, 129.9, 131.6, 131.8, 134.3, 135.6, 157.2, 167.3, 189.7. HRMS(FAB):  $m/z$  calcd. for  $\text{C}_{20}\text{H}_{19}\text{O}_3$  [ $\text{M} + \text{H}$ ] 307.1334; found 307.1341.

**(E)-4-Benzylidene-6-hydroxy-1-(2-methoxyphenyl)hex-1-yn-3-one (4da):**  $R_f = 0.25$ . 14.6 mg (25%). Yellow oil. IR (neat)  $\nu$   $\text{cm}^{-1}$ : 3430, 2971, 2197, 1614, 1277, 1044.  $^1\text{H}$  NMR (500 MHz)  $\delta$  ppm; 2.06 (t,  $J = 6.3$  Hz, 1H), 2.95 (t,  $J = 6.3$  Hz, 2H), 3.87 (td,  $J = 6.3, 6.3$  Hz, 2H), 3.94 (s, 3H), 6.94 (d,  $J = 8.5$  Hz, 1H), 6.98 (t,  $J = 7.5$  Hz, 1H), 7.38-7.48 (m, 4H), 7.56-7.60 (m, 3H), 8.45 (s, 1H).  $^{13}\text{C}$  NMR (125 MHz)  $\delta$  ppm; 29.4, 55.9, 61.8, 90.2, 90.4, 109.4, 110.7, 120.7, 128.8, 129.5, 129.7, 132.4, 134.8, 135.2, 139.4, 148.5, 161.7, 181.6. HRMS(FAB):  $m/z$  calcd. for  $\text{C}_{20}\text{H}_{19}\text{O}_3$  [ $\text{M} + \text{H}$ ] 307.1334; found 307.1341.

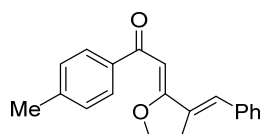

**(2Z)-2-[(E)-3-Benzylidenedihydrofuran-2(3H)-ylidene]-1-(p-tolyl)ethanone (3ea):**  $R_f = 0.21$ . 76.1 mg (65%). Yellow amorphous. IR (neat)  $\nu$   $\text{cm}^{-1}$ : 2974, 1607, 1251, 1181.  $^1\text{H}$  NMR (500 MHz)  $\delta$  ppm; 2.41 (s, 3H), 3.12 (td,  $J = 7.5, 3.0$  Hz, 2H), 4.62 (t,  $J = 7.5$  Hz, 2H), 6.58 (s, 1H), 7.25 (d,  $J = 8.5$  Hz, 2H), 7.31 (t,  $J = 3.0$  Hz, 1H), 7.34-7.41 (m, 1H), 7.42-7.49 (m, 4H), 7.90 (d,  $J = 8.5$  Hz, 2H).  $^{13}\text{C}$  NMR (125 MHz)  $\delta$  ppm; 21.6, 29.1, 72.1, 90.5, 126.4, 127.3, 127.8, 128.8, 129.0, 129.4, 134.3, 135.6, 137.7, 142.2, 168.5, 188.1. HRMS(FAB):  $m/z$  calcd. for  $\text{C}_{20}\text{H}_{19}\text{O}_2$  [ $\text{M} + \text{H}$ ] 291.1385; found 291.1355.

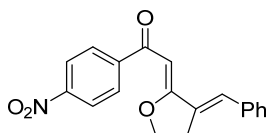

**(2Z)-2-[(E)-3-Benzylidenedihydrofuran-2(3H)-ylidene]-1-(4-nitrophenyl)ethanone (3fa):**  $R_f = 0.25$ . 29.7 mg (23%). Yellow solid. MP: 195-196  $^{\circ}\text{C}$ . IR (KBr)  $\nu$   $\text{cm}^{-1}$ : 3068, 1556, 1520, 1345, 1025.  $^1\text{H}$  NMR (500 MHz)  $\delta$  ppm; 3.16 (td,  $J = 7.5, 2.5$  Hz, 2H), 4.67 (t,  $J = 7.5$  Hz, 2H), 6.51 (s, 1H), 7.36 (t,  $J = 2.5$  Hz, 1H), 7.39 (tt,  $J = 7.5, 2.0$  Hz, 1H), 7.43-7.51 (m, 4H), 8.09 (d,  $J = 8.5$  Hz, 2H), 8.29 (d,  $J = 8.5$  Hz, 2H).  $^{13}\text{C}$  NMR (125 MHz)  $\delta$  ppm; 29.0, 72.7, 90.2, 123.6, 128.6, 128.87, 128.92, 129.3, 129.6, 133.7, 135.2, 145.5, 149.4, 170.7, 186.3. HRMS(FAB):  $m/z$  calcd. for  $\text{C}_{19}\text{H}_{16}\text{NO}_4$  [ $\text{M} + \text{H}$ ] 322.1079; found 322.1111.

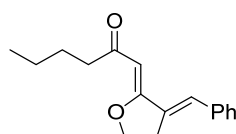

**(2Z)-1-[(E)-3-Benzylidenedihydrofuran-2(3H)-ylidene]hexan-2-one (3ga):**  $R_f = 0.43$ . 67.0 mg (65%). Colorless amorphous. IR (neat)  $\nu$   $\text{cm}^{-1}$ : 2956, 1618, 1399, 1033.  $^1\text{H}$  NMR (500 MHz)  $\delta$  ppm; 0.93 (t,  $J = 7.5$  Hz, 3H), 1.37 (sext,  $J = 7.5$  Hz, 2H), 1.63 (quint,  $J = 7.5$  Hz, 2H), 2.67 (t,  $J = 7.5$  Hz, 2H), 3.09 (td,  $J = 7.5, 3.0$  Hz, 2H), 4.52 (t,  $J = 7.5$  Hz, 2H), 5.76 (s, 1H), 7.14 (t,  $J = 3.0$  Hz, 1H), 7.32-7.37 (m, 1H), 7.39-7.43 (m, 4H), 7.42-7.49 (m, 4H).  $^{13}\text{C}$  NMR (125 MHz)  $\delta$  ppm; 13.9, 22.5, 27.0, 29.1, 43.1, 71.5, 95.7, 127.2, 128.6, 128.7, 129.2, 133.5, 135.6, 166.3, 199.7. HRMS(FAB):  $m/z$  calcd. for  $\text{C}_{17}\text{H}_{21}\text{O}_2$  [ $\text{M} + \text{H}$ ] 257.1542; found 257.1530.

## Preparation and Characterization of 4-En-1-yn-3-ones 4aa, 4aj or 4ak

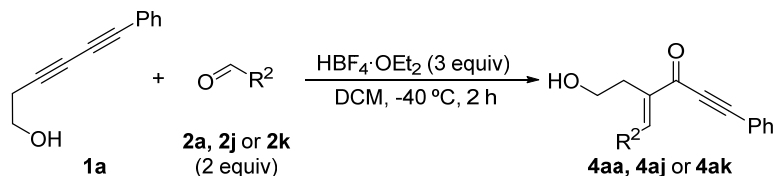

To a solution of 3,5-diynol **1a** (68.1 mg, 0.4 mmol) and aldehyde **2** (**2a**: 81.6  $\mu\text{L}$ , 0.80 mmol; **2j**: 100.7  $\mu\text{L}$ , 0.80 mmol; **2k**: 96.5  $\mu\text{L}$ , 0.80 mmol) in dichloromethane (DCM, 2.5 mL) was added  $\text{HBF}_4 \cdot \text{OEt}_2$  (163.3  $\mu\text{L}$ , 1.2 mmol) at  $-40^{\circ}\text{C}$ . After being stirred at same temperature for 2 h, the reaction mixture was quenched with sat.  $\text{NaHCO}_3$  and extracted with AcOEt. The organic layer was dried over  $\text{MgSO}_4$  and concentrated in vacuo to dryness. The residue was purified by PTLC (hexane:AcOEt = 2:1) to give **4aa**, **4aj** or **4ak**.

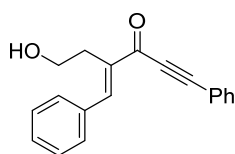

**(E)-4-Benzylidene-6-hydroxy-1-phenylhex-1-yn-3-one (4aa):**  $R_f = 0.30$ . 79.6 mg (72%). Yellow oil. IR (neat)  $\nu$   $\text{cm}^{-1}$ : 3429, 2973, 2876, 1617, 1277.  $^1\text{H}$  NMR (500 MHz)  $\delta$  ppm; 2.07 (br.s, 1H), 2.94 (t,  $J = 6.5$  Hz, 2H), 3.87 (t,  $J = 6.5$  Hz, 2H), 7.38-7.48 (m, 6H), 7.57 (d,  $J = 7.5$  Hz, 2H), 7.64 (dd,  $J = 8.5, 1.5$  Hz, 2H), 8.26 (s, 1H).  $^{13}\text{C}$  NMR (125 MHz)  $\delta$  ppm; 29.4, 61.7, 86.0, 92.9, 120.2, 128.7, 128.8, 129.6, 129.7, 130.6, 132.8, 134.8, 139.4, 148.3, 181.4. HRMS(FAB):  $m/z$  calcd. for  $\text{C}_{19}\text{H}_{15}\text{O}$  [ $\text{M} - \text{OH}$ ] 259.1123; found 259.1135.



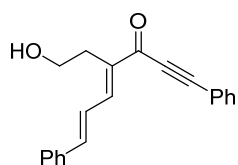

**(4E,6E)-4-(2-Hydroxyethyl)-1,7-diphenylhepta-4,6-dien-1-yn-3-one (4aj):**  $R_f$  = 0.26. 68.2 mg (56%). Yellow solid. MP: 86–88 °C. IR (KBr)  $\nu$   $\text{cm}^{-1}$ : 3345, 2882, 1604.  $^1\text{H}$  NMR (500 MHz)  $\delta$  ppm; 1.85 (t,  $J$  = 5.2 Hz, 1H), 2.89 (t,  $J$  = 6.3 Hz, 2H), 3.77 (td,  $J$  = 6.3, 5.2 Hz, 2H), 7.11 (d,  $J$  = 15.0 Hz, 1H), 7.27 (dd,  $J$  = 15.0, 11.0 Hz, 1H), 7.33–7.45 (m, 5H), 7.48 (tt,  $J$  = 7.5, 1.0 Hz, 1H), 7.55 (d,  $J$  = 7.5 Hz, 2H), 7.65 (dt,  $J$  = 7.5, 1.0 Hz, 2H), 7.89 (d,  $J$  = 11.0 Hz, 1H).  $^{13}\text{C}$  NMR (125 MHz)  $\delta$  ppm; 29.0, 61.9, 86.2, 92.0, 120.3, 123.7, 127.5, 128.6, 128.8, 129.5, 130.4, 132.7, 135.9, 138.2, 143.0, 147.4, 180.1. HRMS(FAB):  $m/z$  calcd. for  $\text{C}_{21}\text{H}_{19}\text{O}_2$  [ $M + \text{H}$ ] 303.1385; found 303.1394.

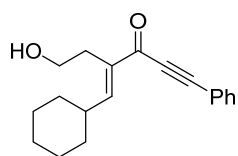

**(E)-4-(Cyclohexylmethylene)-6-hydroxy-1-phenylhex-1-yn-3-one (4ak):**  $R_f$  = 0.46. 67.1 mg (61%). Yellow oil. IR (neat)  $\nu$   $\text{cm}^{-1}$ : 3437, 2927, 2202, 1626.  $^1\text{H}$  NMR (500 MHz)  $\delta$  ppm; 1.20–1.42 (m, 6H), 1.69–1.85 (m, 5H), 2.48–2.58 (m, 1H), 2.67 (t,  $J$  = 6.5 Hz, 2H), 3.68 (t,  $J$  = 6.5 Hz, 2H), 7.16 (d,  $J$  = 10.2 Hz, 1H), 7.40 (td,  $J$  = 7.5, 1.5 Hz, 2H), 7.46 (tt,  $J$  = 7.5, 1.5 Hz, 1H), 7.59 (dt,  $J$  = 7.5, 1.5 Hz, 2H).  $^{13}\text{C}$  NMR (125 MHz)  $\delta$  ppm; 25.3, 25.7, 28.9, 32.1, 38.5, 62.0, 86.0, 91.9, 120.3, 128.6, 130.4, 132.7, 137.4, 157.9, 181.3. HRMS(FAB):  $m/z$  calcd. for  $\text{C}_{19}\text{H}_{21}\text{O}$  [ $M - \text{OH}$ ] 265.1592; found 265.1609.

### Preparation of 2,3-Dialkylidenetetrahydrofuran 3aa from 4-En-1-yn-3-one 4aa

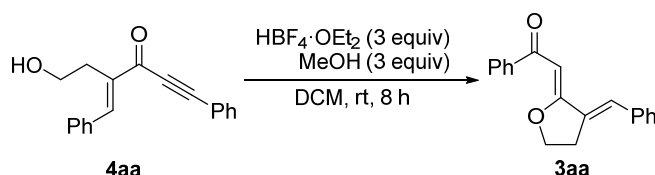

To a solution of 4-en-2-ynone **4aa** (110.5 mg, 0.4 mmol) and methanol (48.6  $\mu\text{L}$ , 1.2 mmol) in dichloromethane (DCM, 2.5 mL) was added  $\text{HBF}_4 \cdot \text{OEt}_2$  (163.3  $\mu\text{L}$ , 1.2 mmol) at 0 °C. After being stirred at room temperature for 8 h, the reaction mixture was quenched with sat.  $\text{NaHCO}_3$  and extracted with AcOEt. The organic layer was dried over  $\text{MgSO}_4$  and concentrated in vacuo to dryness. The residue was purified by PTLC (hexane:AcOEt = 1:1,  $R_f$  = 0.25) to give **3aa** (83.0 mg, 75%).

### Preparation and Characterization of Dihydrobenzofuran 5

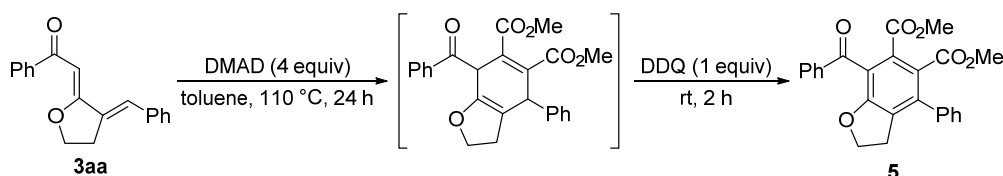

A solution of 2,3-dialkylidenetetrahydrofuran **3aa** (27.6 mg, 0.1 mmol) and dimethyl acetylenedicarboxylate (DMAD, 49  $\mu\text{L}$ , 0.4 mmol) in toluene (1 mL) was stirred at 110 °C for 24 h. After the reaction mixture was cooled to room temperature, 2,3-Dichloro-5,6-dicyano-1,4-benzoquinone (DDQ, 22.7 mg, 0.1 mmol) was added. After being stirred at same temperature for 2 h, the reaction mixture was quenched with sat.  $\text{NaHCO}_3$  and extracted with AcOEt. The organic layer was dried over  $\text{MgSO}_4$  and concentrated in vacuo to dryness. The residue was purified by PTLC (hexane:AcOEt = 2:1) to give **5** (17.9 mg, 43%).

**Dimethyl 7-benzoyl-2,3-dihydro-4-phenylbenzofuran-5,6-dicarboxylate (5):**  $R_f$  = 0.34. Yellow amorphous. IR (neat)  $\nu$   $\text{cm}^{-1}$ : 2975, 1736, 1671, 1246, 1035.  $^1\text{H}$  NMR (500 MHz)  $\delta$  ppm; 3.10 (t,  $J$  = 9.0 Hz, 2H), 3.52 (s, 3H), 3.53 (s, 3H), 4.59 (t,  $J$  = 9.0 Hz, 2H), 7.30 (dt,  $J$  = 7.5, 1.5 Hz, 2H), 7.39 (tt,  $J$  = 7.5, 1.5 Hz, 1H), 7.41–7.49 (m, 4H), 7.58 (tt,  $J$  = 7.5, 1.5 Hz, 1H), 7.88 (dt,  $J$  = 7.5, 1.5 Hz, 2H).  $^{13}\text{C}$  NMR (125 MHz)  $\delta$  ppm; 29.0, 52.1, 52.3, 72.5, 121.1, 127.5, 128.0, 128.1, 128.4, 128.5, 129.2, 130.0, 131.3, 133.4, 136.8, 136.9, 139.0, 157.8, 166.1, 168.1, 193.2. HRMS(FAB):  $m/z$  calcd. for  $\text{C}_{25}\text{H}_{20}\text{O}_6$  [ $M$ ] 416.1260; found 416.1272.

### Preparation and Characterization of 4-En-1-yn-3-one 8

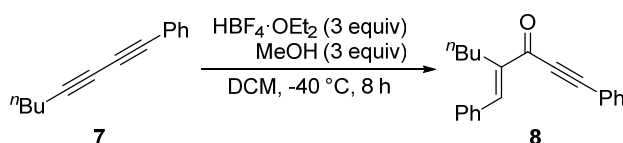

To a solution of diyne **7**<sup>9</sup> (72.9 mg, 0.4 mmol), benzaldehyde (**2a**: 81.6  $\mu$ L, 0.80 mmol) and methanol (48.6  $\mu$ L, 1.2 mmol) in dichloromethane (DCM, 2.5 mL) was added HBF<sub>4</sub>·OEt<sub>2</sub> (163.3  $\mu$ L, 1.2 mmol) at -40 °C. After being stirred at same temperature for 8 h, the reaction mixture was quenched with sat. NaHCO<sub>3</sub> and extracted with AcOEt. The organic layer was dried over MgSO<sub>4</sub> and concentrated in vacuo to dryness. The residue was purified by medium-pressure liquid chromatography (MPLC, hexane:AcOEt = 99:1, flow rate 20 mL/min) to give **8** (69.4 mg, 60%).

**(E)-4-Benzylidene-1-phenyloct-1-yn-3-one (8)**: Colorless oil. IR (neat)  $\nu$  cm<sup>-1</sup>: 2200, 1622. <sup>1</sup>H NMR (500 MHz)  $\delta$  ppm; 0.95 (t,  $J$  = 7.3 Hz, 3H), 1.44 (sextet,  $J$  = 7.3 Hz, 2H), 1.50-1.58 (m, 2H), 2.64 (t,  $J$  = 8.0 Hz, 2H), 7.37-7.48 (m, 6H), 7.51 (d,  $J$  = 7.4 Hz, 2H), 7.64 (dd,  $J$  = 8.3, 1.4 Hz, 2H), 8.09 (s, 1H). <sup>13</sup>C NMR (125 MHz)  $\delta$  ppm; 13.8, 22.9, 25.6, 30.8, 86.4, 91.6, 120.4, 128.55, 128.61, 129.14, 129.6, 130.3, 132.7, 135.4, 143.1, 145.2, 180.6. HRMS(FAB):  $m/z$  calcd. for C<sub>21</sub>H<sub>21</sub>O [M+H] 289.1592; found 289.1605.

<sup>9</sup> Y. Matsuda, S. Naoe, S. Oishi, N. Fujii, H. Ohno, *Chem. Eur. J.* **2015**, 21, 1463–1467.

## 2D NMR spectra of Product 3aa, 4aa and 8

HMQC spectra of **3aa**

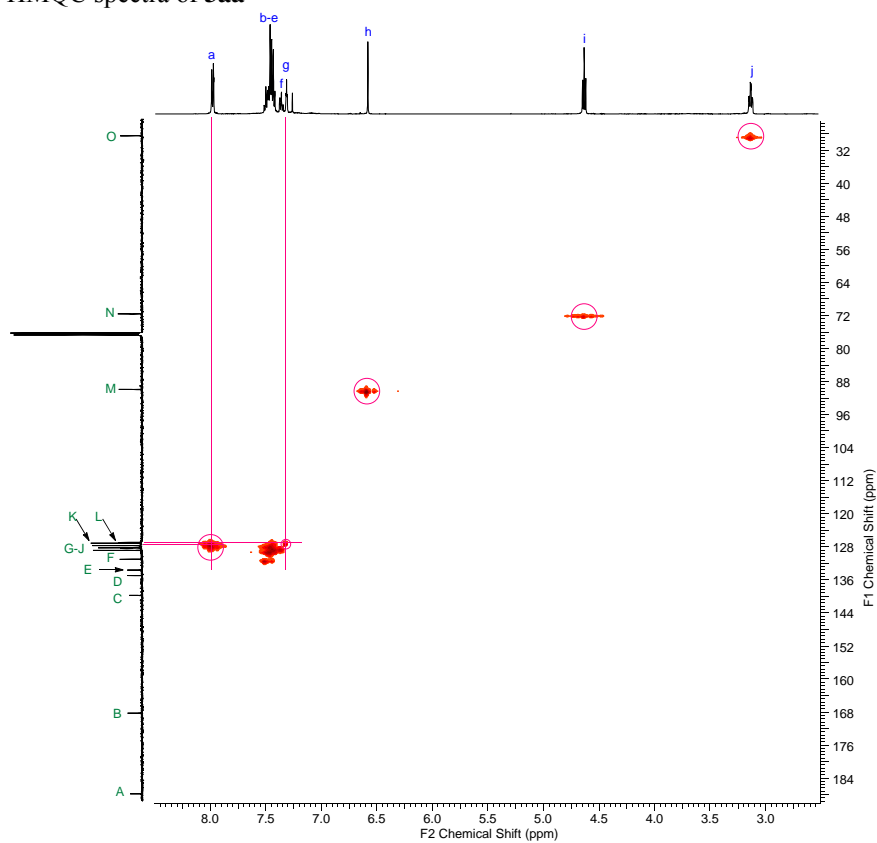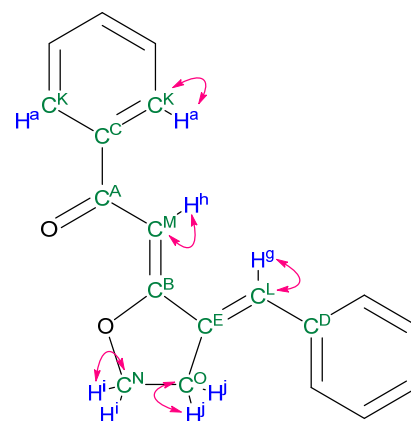

**3aa**

HMBC spectra of **3aa**

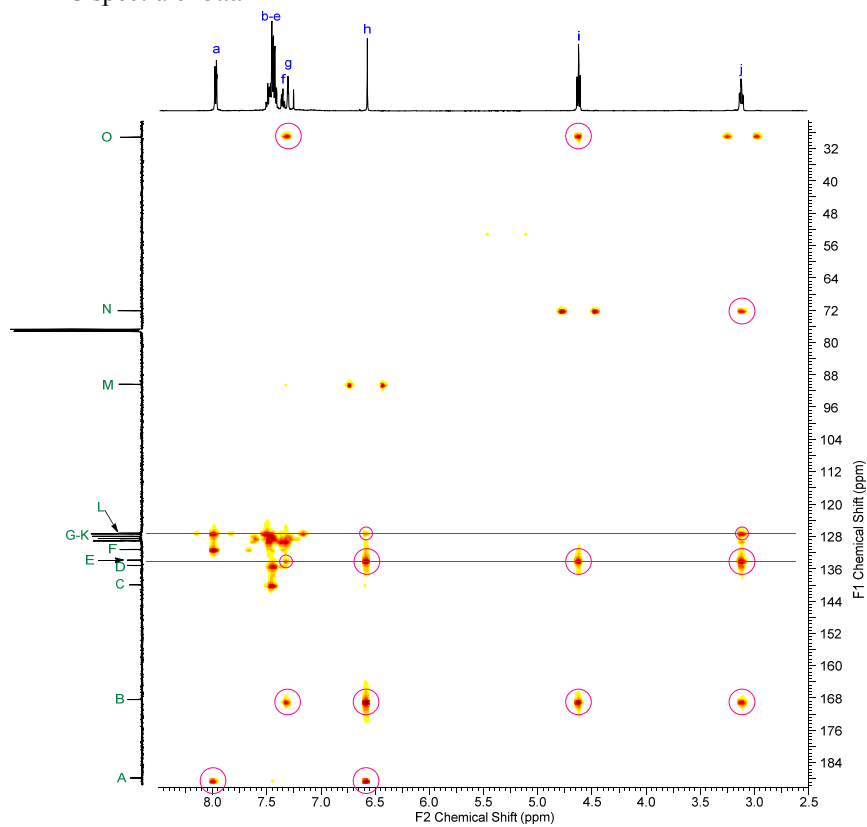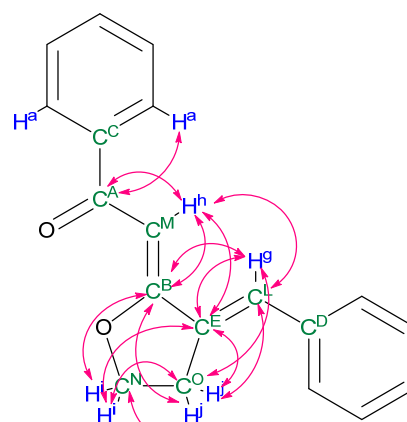

**3aa**

# NOESY spectra of **3aa**

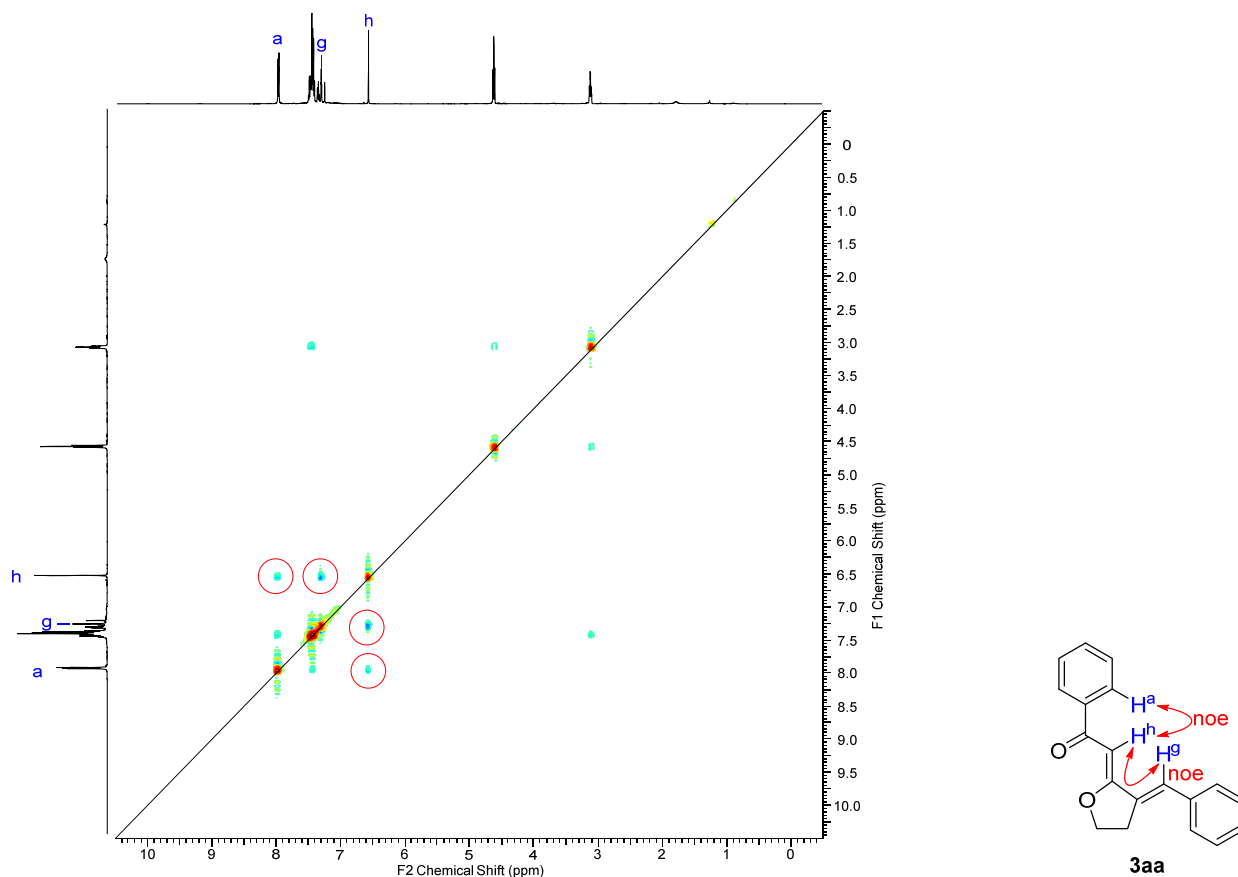

The chart on the right is an enlarged view (6.2–8.2 ppm) of the above NOESY spectrum of **3aa**. As shown in the enlarged view, NOE is not observed between H<sup>a</sup> and H<sup>g</sup> but between H<sup>a</sup> and H<sup>h</sup> or between H<sup>g</sup> and H<sup>h</sup>. Since H<sup>a</sup>, H<sup>g</sup> and H<sup>h</sup> are assigned as each proton in the structure of **3aa** on the upper right, the stereochemistry of **3aa** was determined as the illustrated structure.

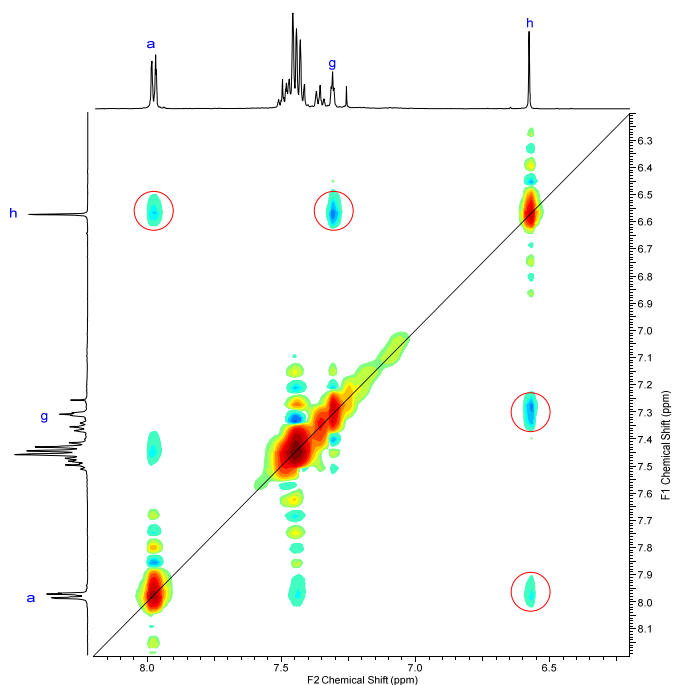

HMQC spectra of **4aa**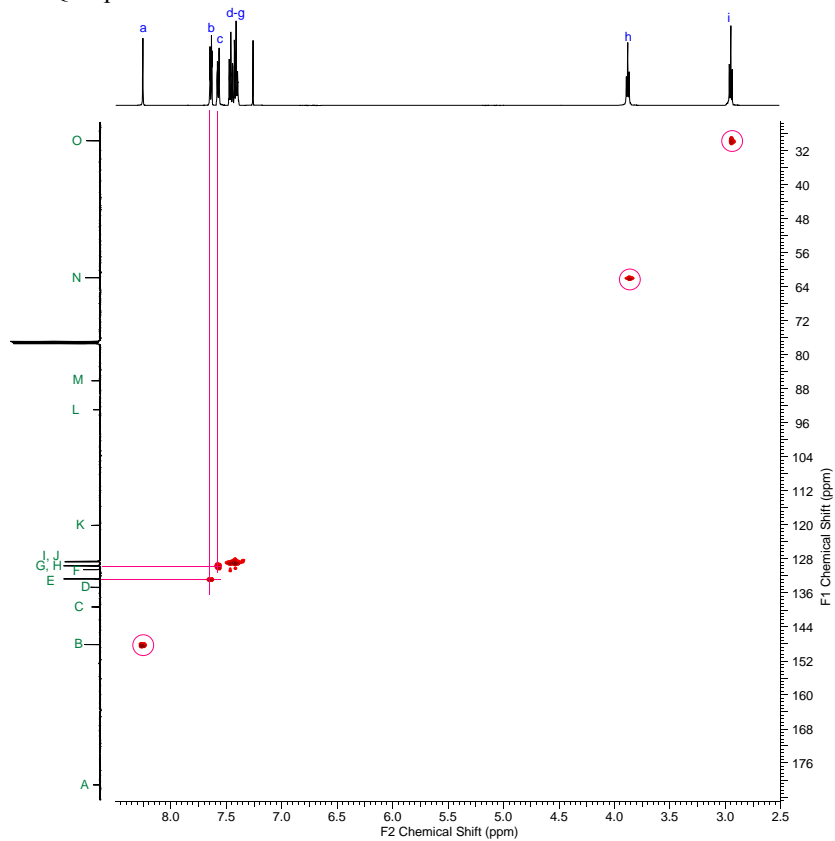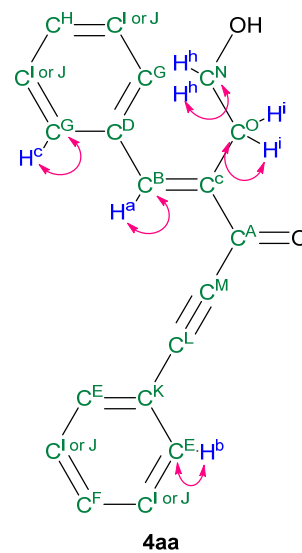HMBC spectra of **4aa**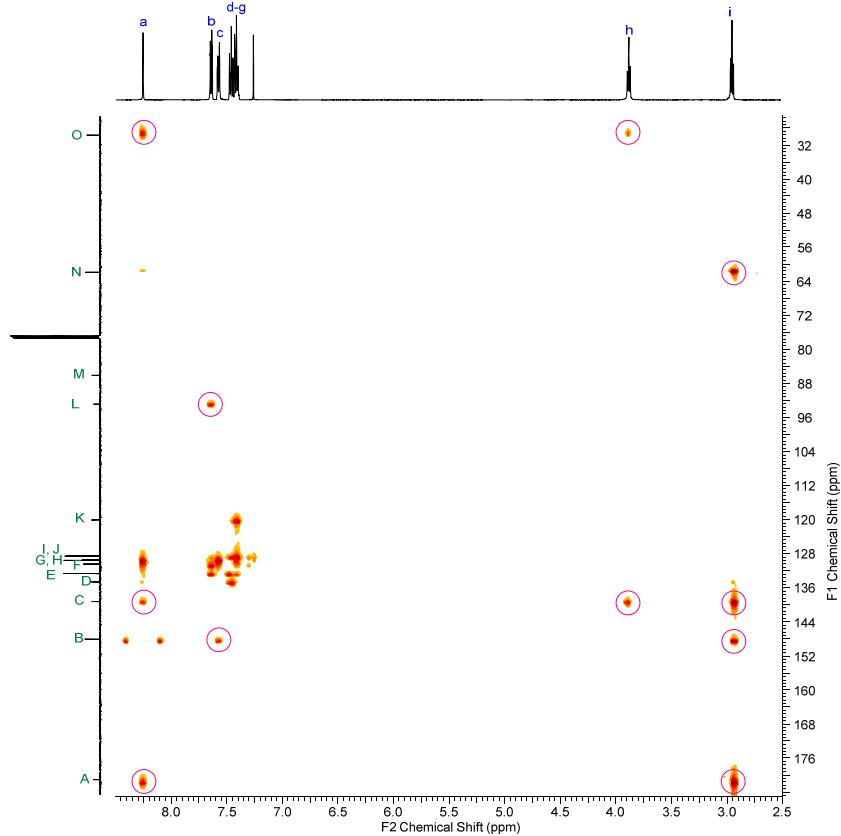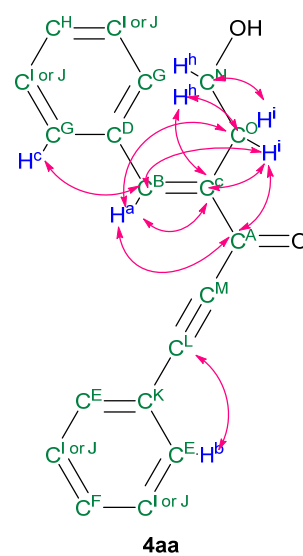

# NOESY spectra of **4aa**

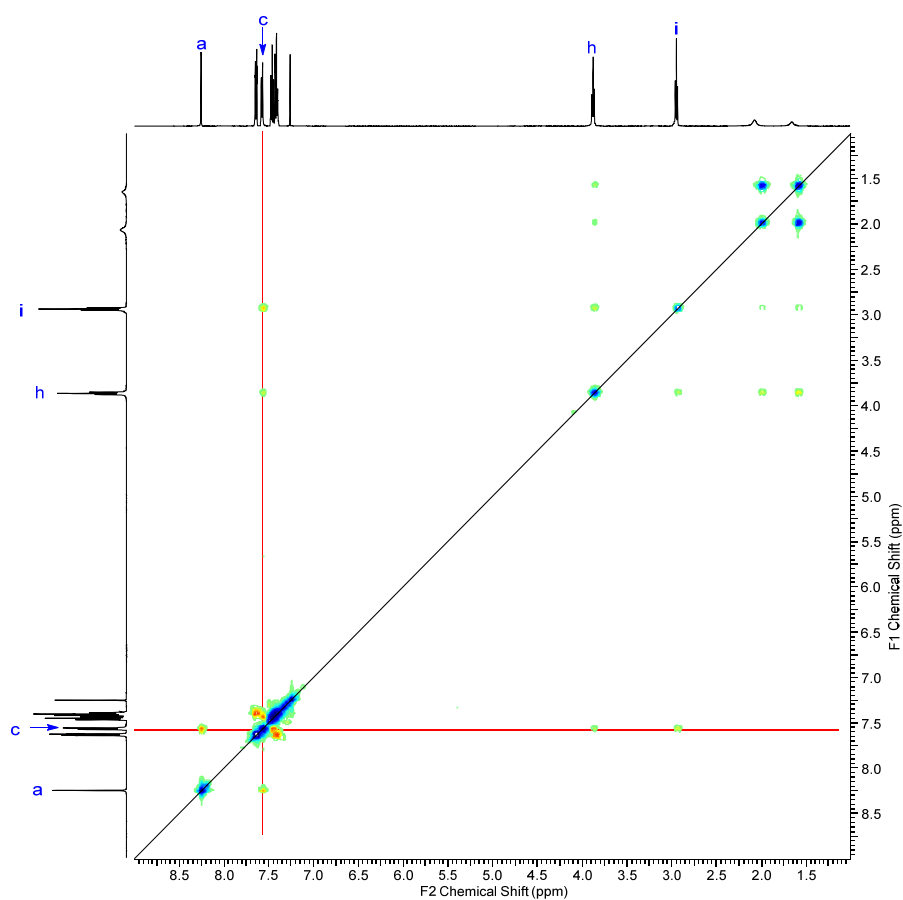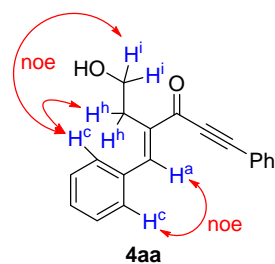

The chart on the right is an enlarged view (7.0–8.5 ppm) of the above NOESY spectrum of **4aa**. As shown in the enlarged view and above NOESY spectrum (red lines), NOE is observed between H<sup>a</sup> and H<sup>c</sup>, between H<sup>c</sup> and H<sup>h</sup> or between H<sup>c</sup> and H<sup>i</sup>. On the other hand, NOE is not observed between H<sup>a</sup> and H<sup>h</sup> or between H<sup>a</sup> and H<sup>i</sup>. Since H<sup>a</sup>, H<sup>c</sup>, H<sup>h</sup> and H<sup>i</sup> are assigned as each proton in the structure of **4aa** on the upper right, the stereochemistry of **4aa** was determined as the illustrated structure.

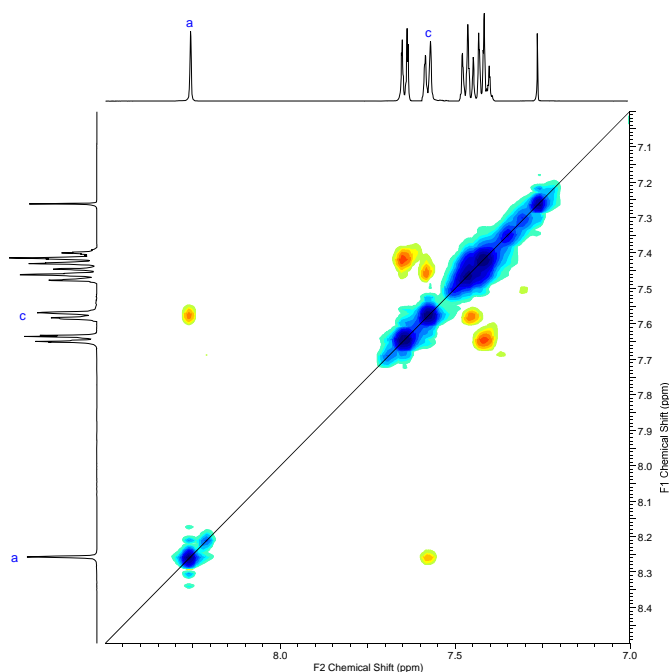

# HMQC spectra of **8**

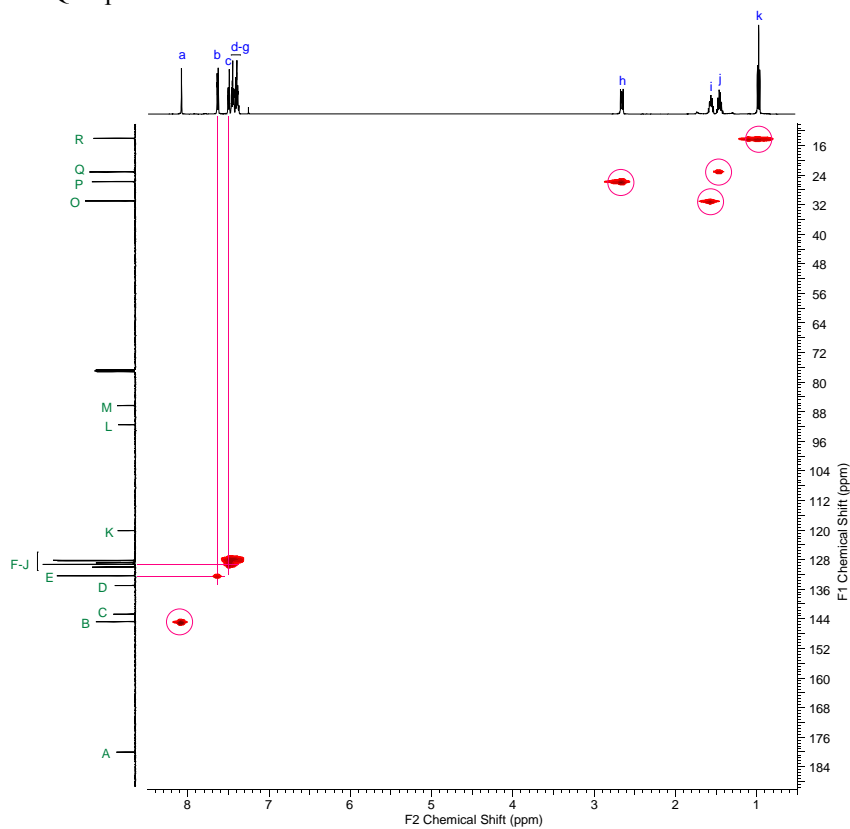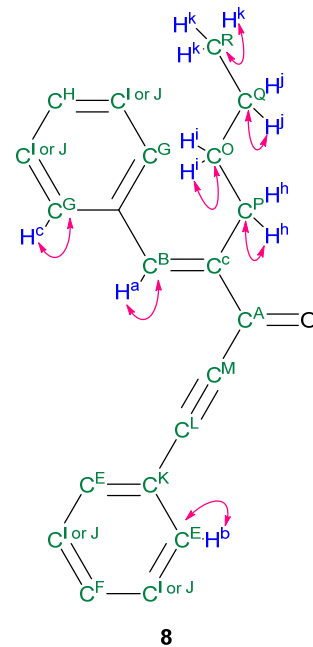

# HMBC spectra of **8**

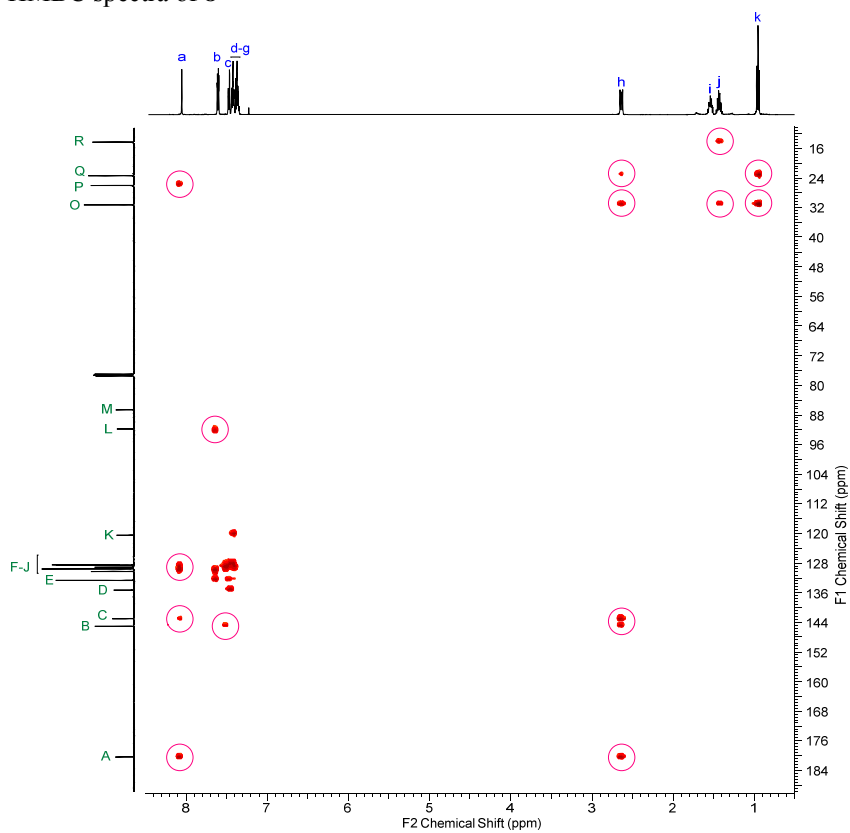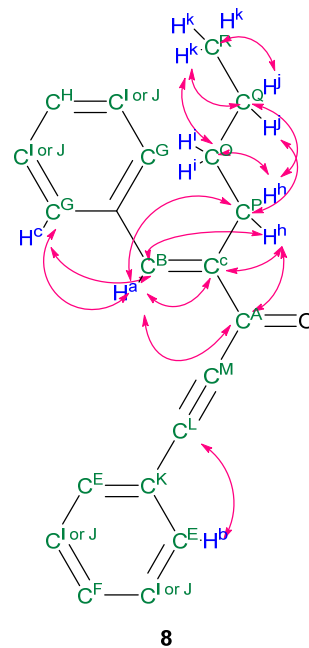

# NOESY spectra of **8**

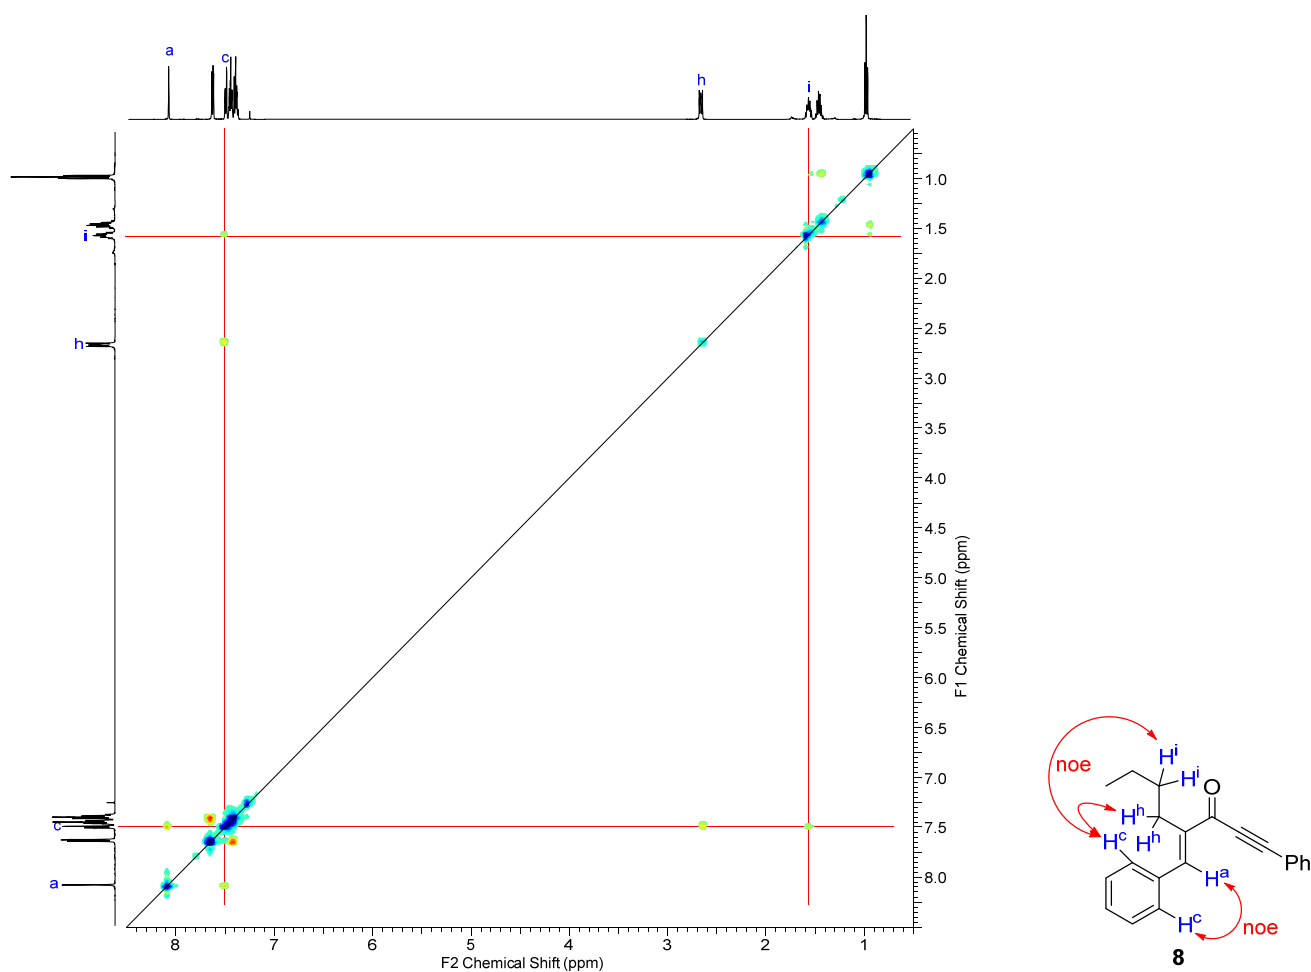

The chart on the right is an enlarged view (7.0–8.5 ppm) of the above NOESY spectrum of **8**. As shown in the enlarged view and above NOESY spectrum (red lines), NOE is observed between H<sup>a</sup> and H<sup>c</sup>, between H<sup>c</sup> and H<sup>h</sup> or between H<sup>c</sup> and H<sup>i</sup>. On the other hand, NOE is not observed between H<sup>a</sup> and H<sup>h</sup> or between H<sup>a</sup> and H<sup>i</sup>. Since H<sup>a</sup>, H<sup>c</sup>, H<sup>h</sup> and H<sup>i</sup> are assigned as each proton in the structure of **8** on the upper right, the stereochemistry of **8** was determined as the illustrated structure.

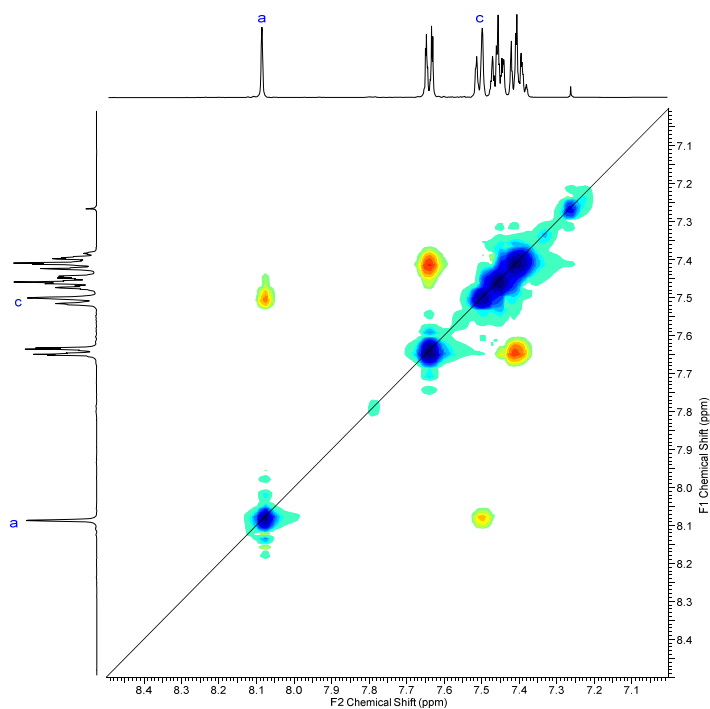



## $^1\text{H}$ and $^{13}\text{C}$ NMR spectra of new compounds

### $^1\text{H}$ NMR of **1c**

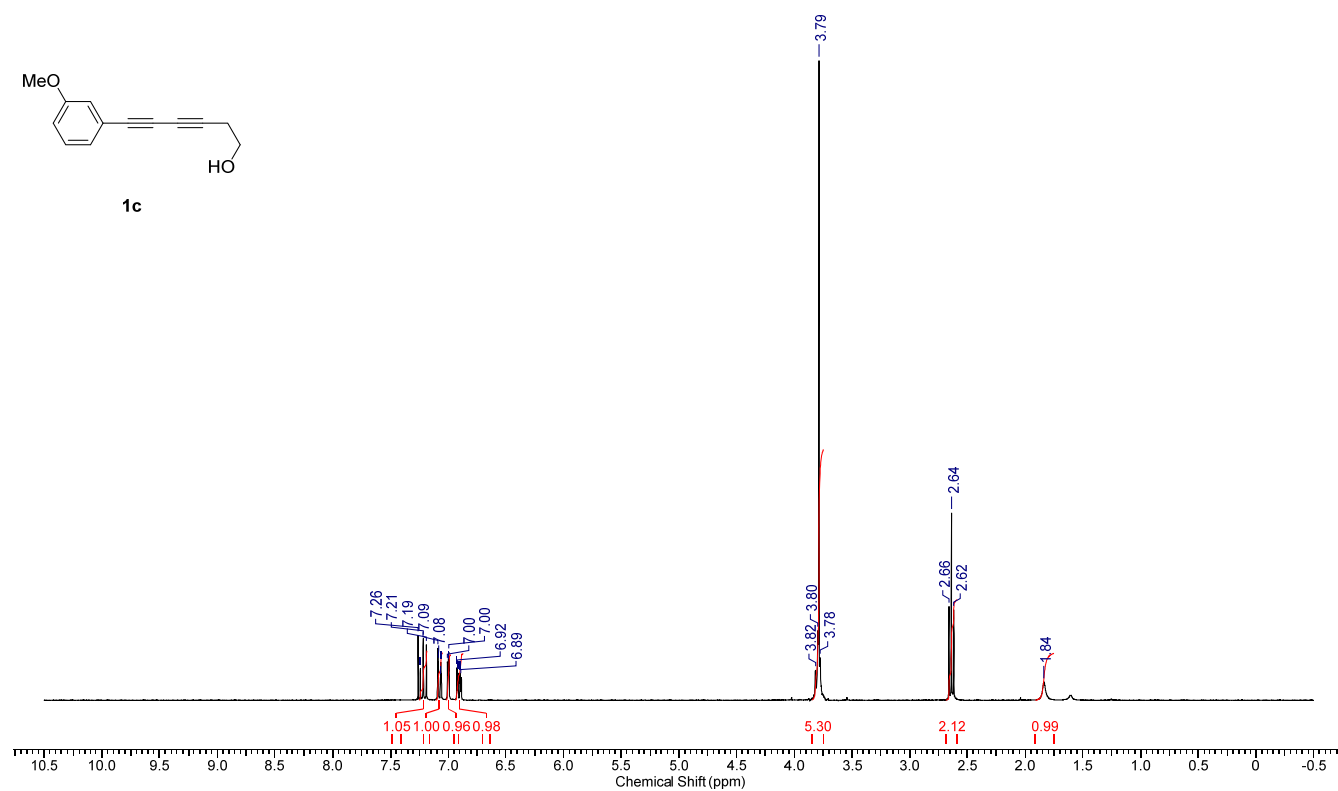

### $^{13}\text{C}$ NMR of **1c**

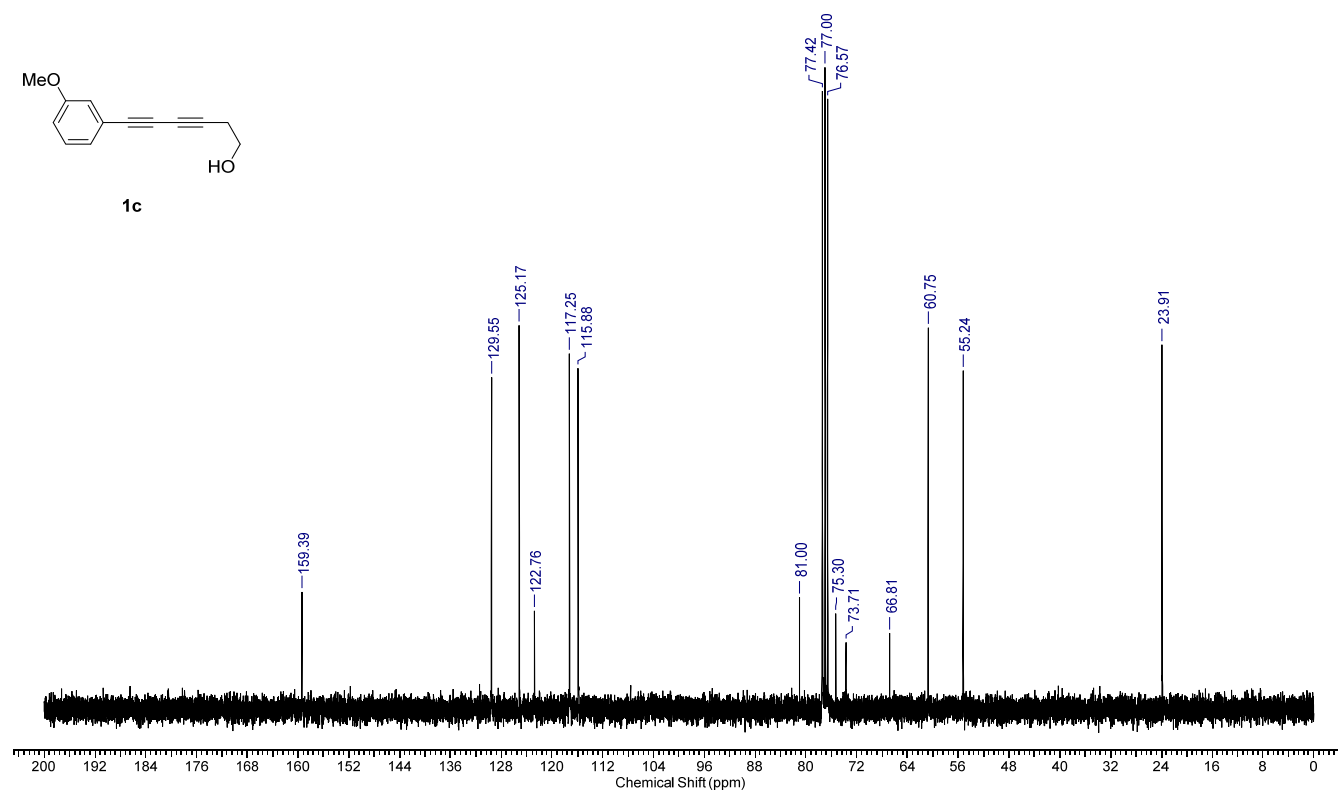

<sup>1</sup>H NMR of **1d**

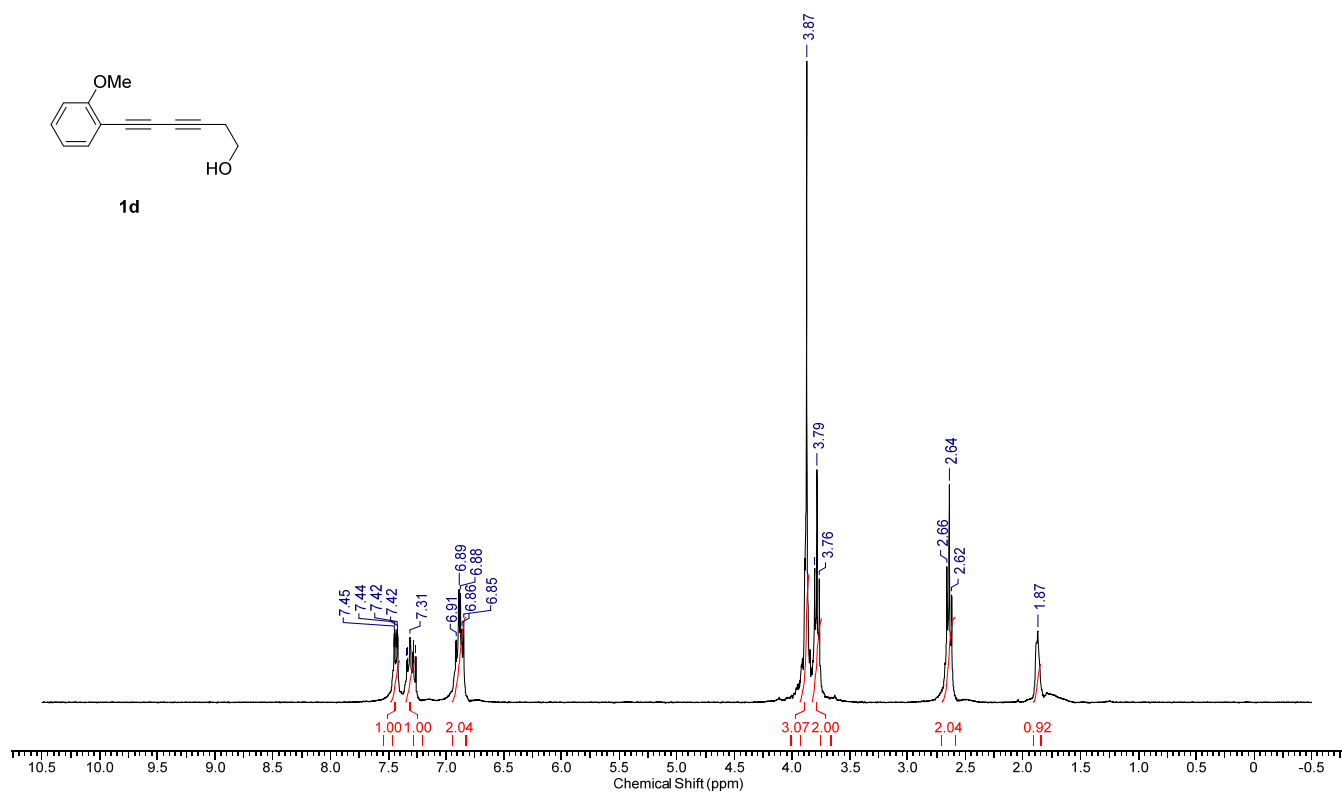

<sup>13</sup>C NMR of **1d**

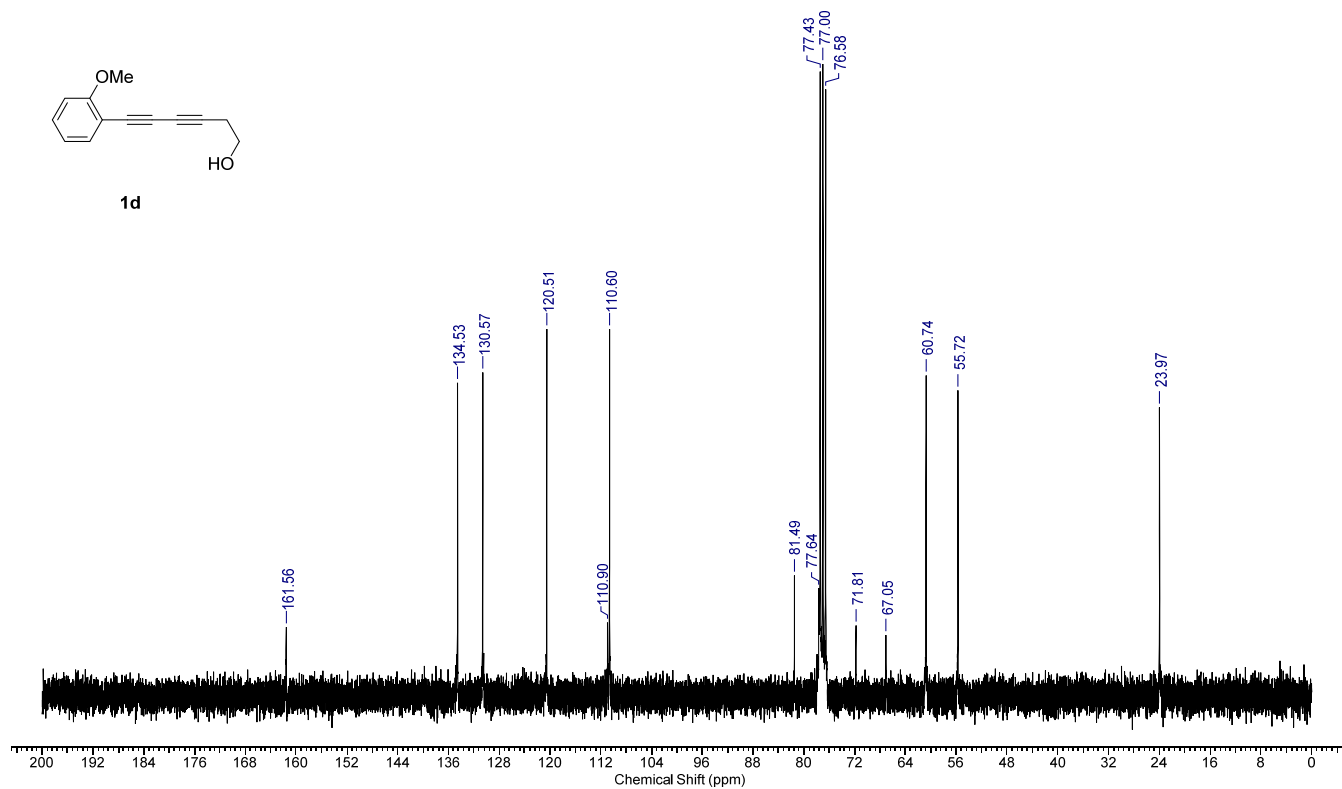

<sup>1</sup>H NMR of **1e**

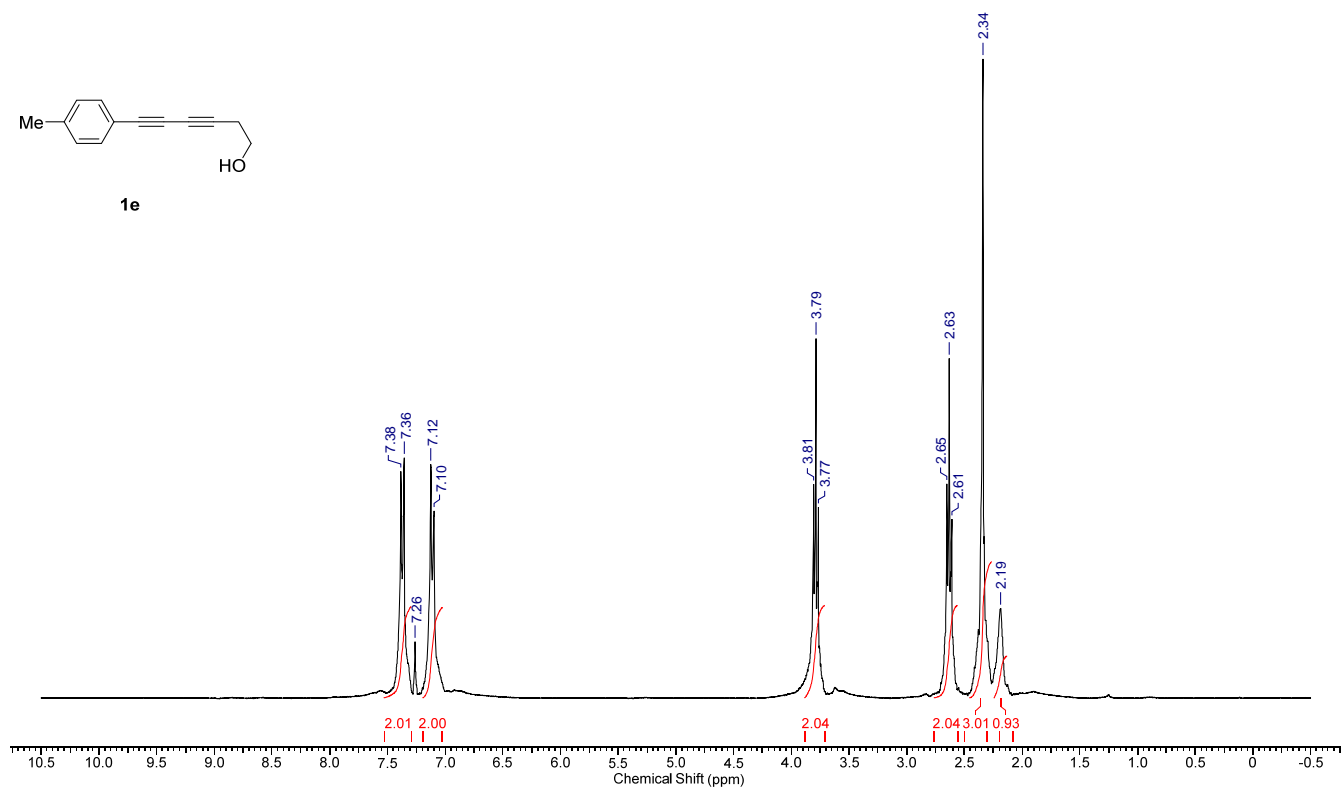

<sup>13</sup>C NMR of **1e**

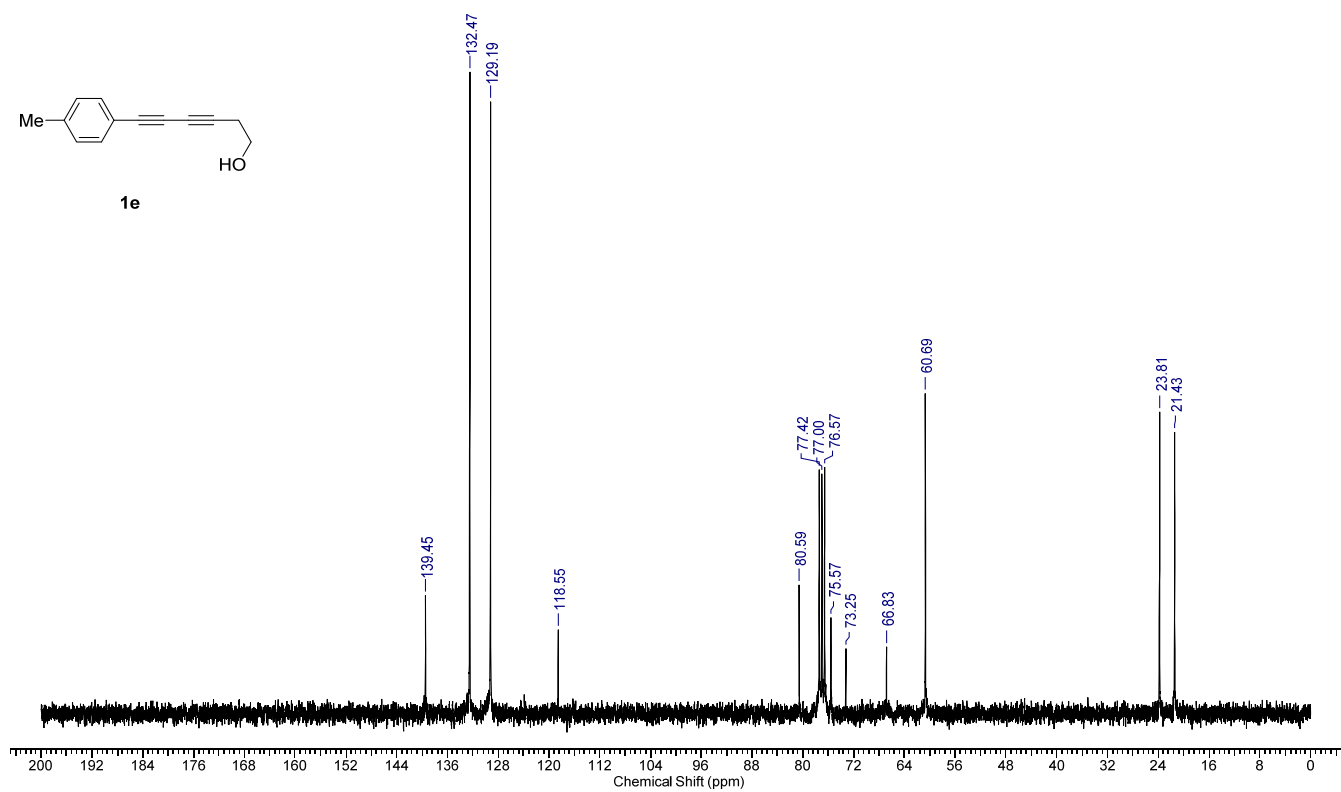

<sup>1</sup>H NMR of **3aa**

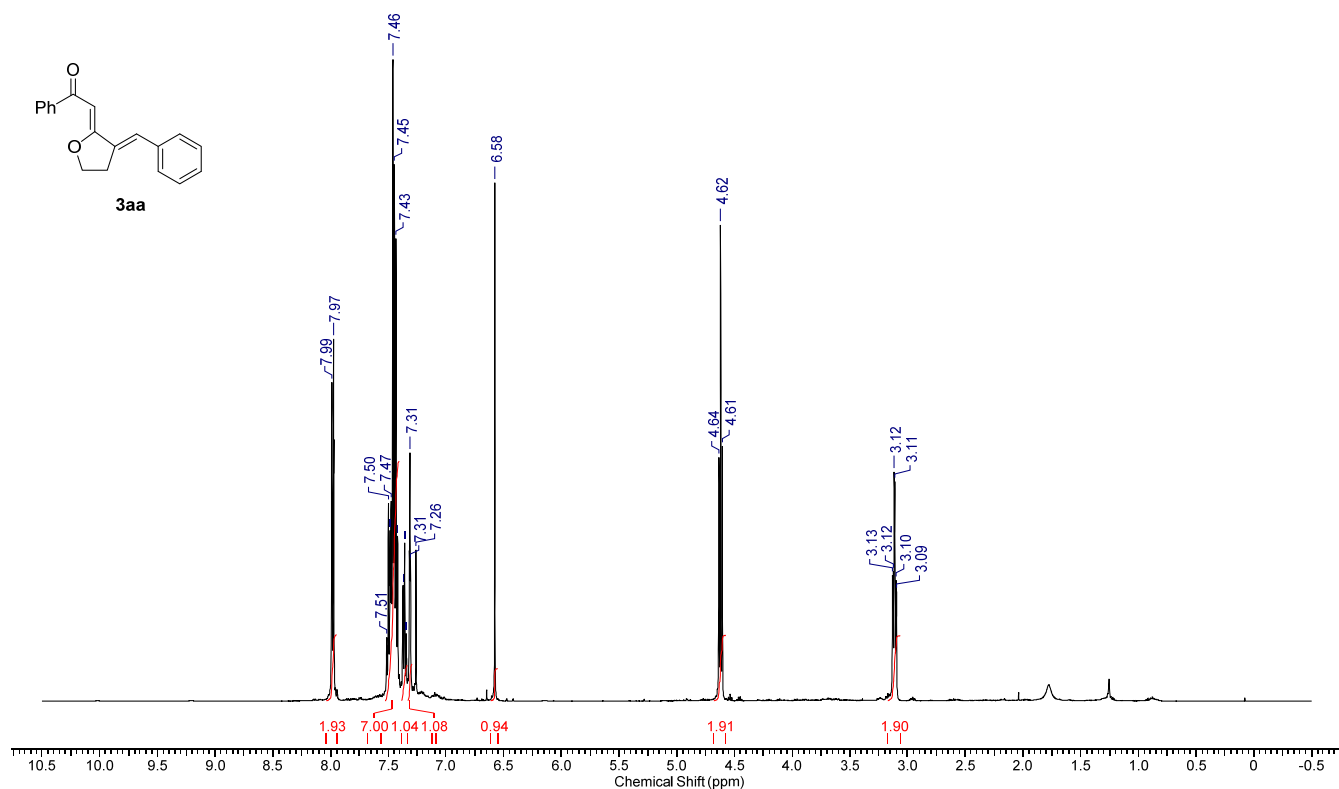

<sup>13</sup>C NMR of **3aa**

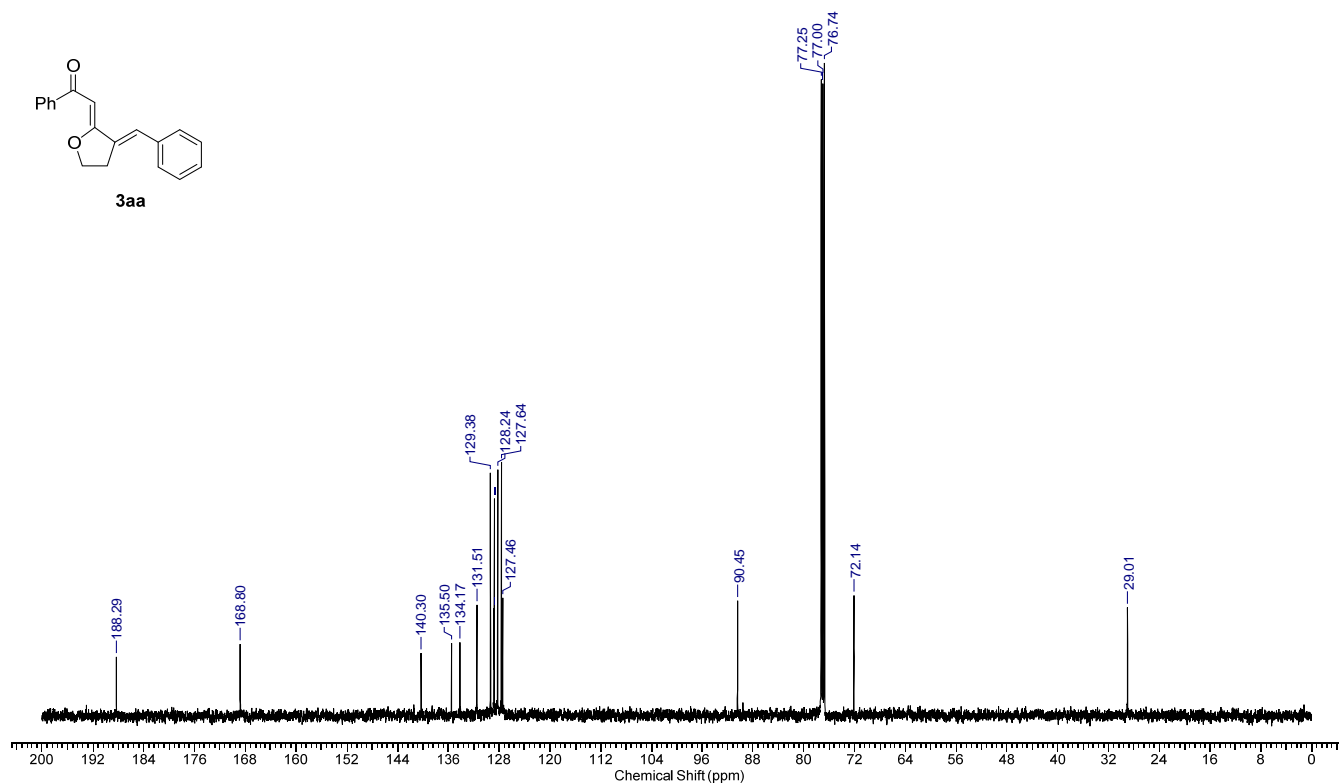

<sup>1</sup>H NMR of **3ab**

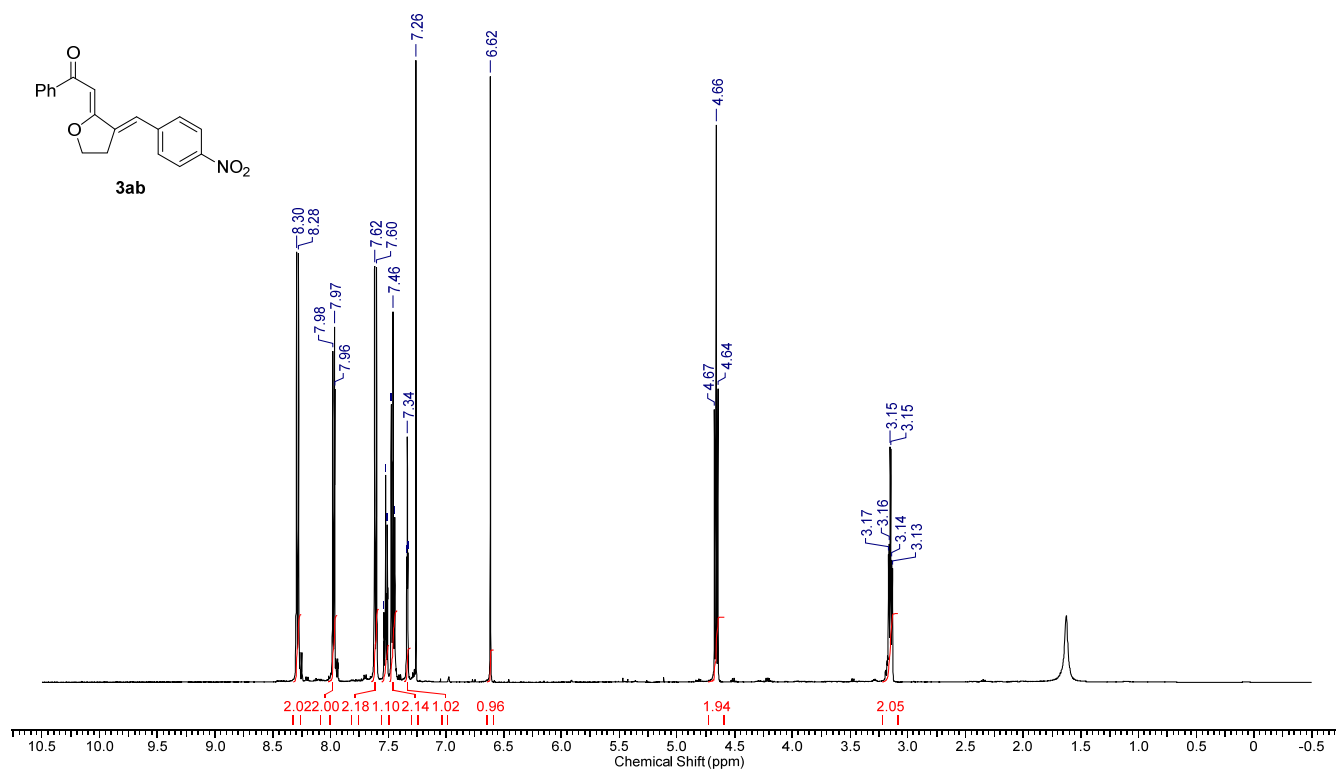

<sup>13</sup>C NMR of **3ab**

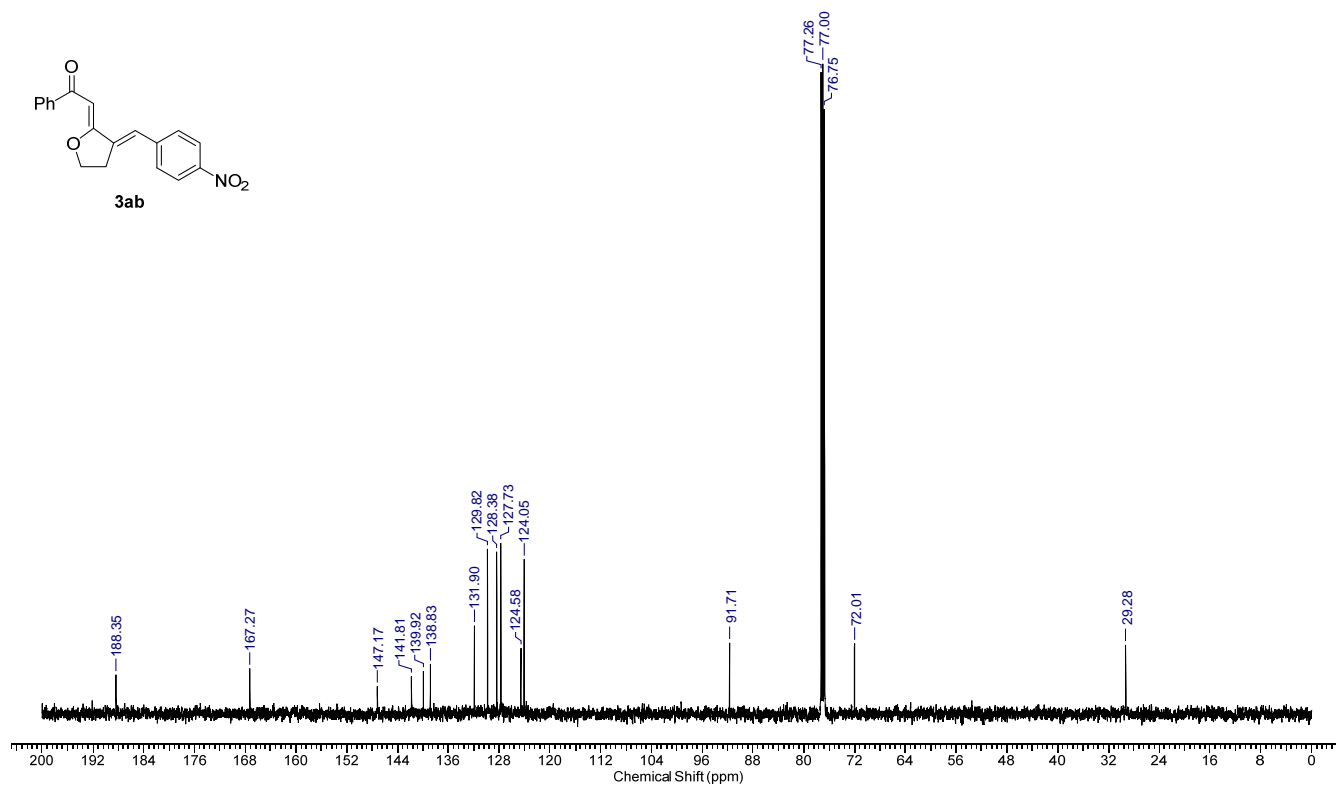

<sup>1</sup>H NMR of **3ac**

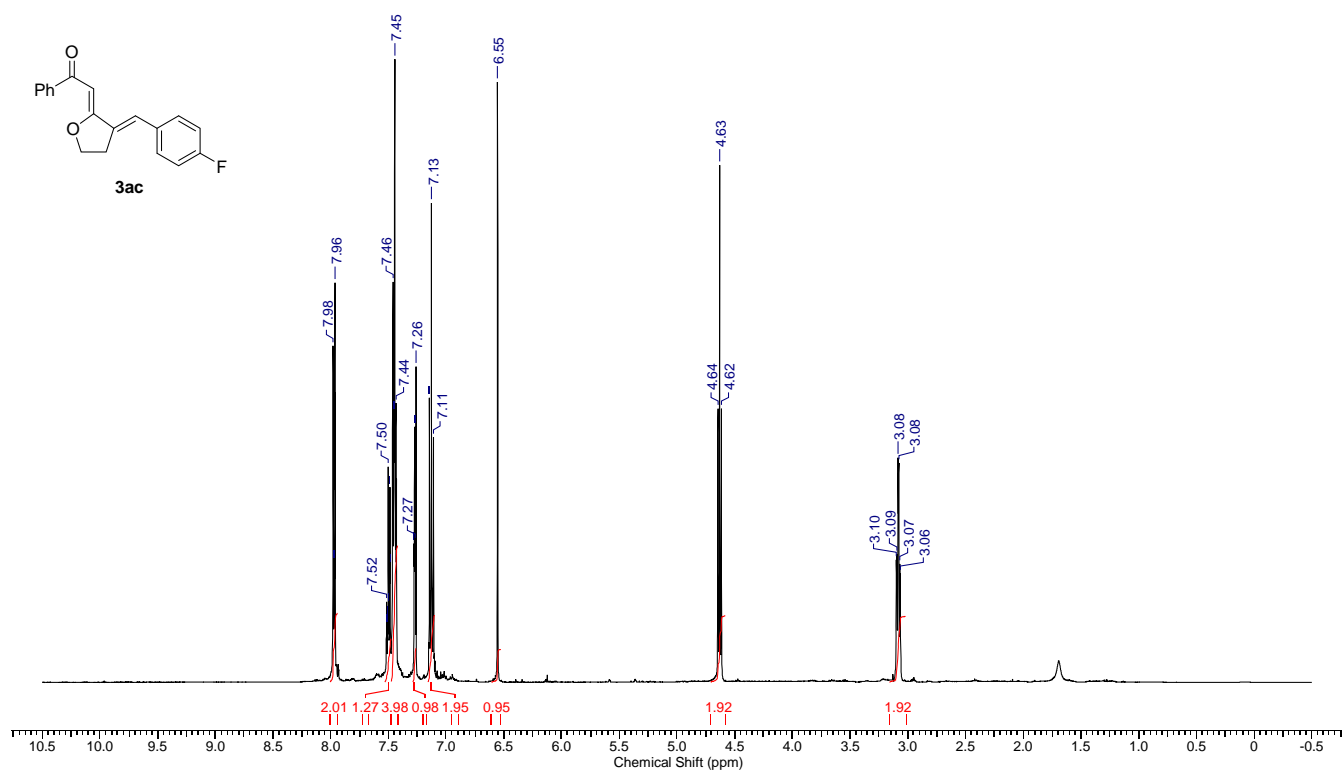

<sup>13</sup>C NMR of **3ac**

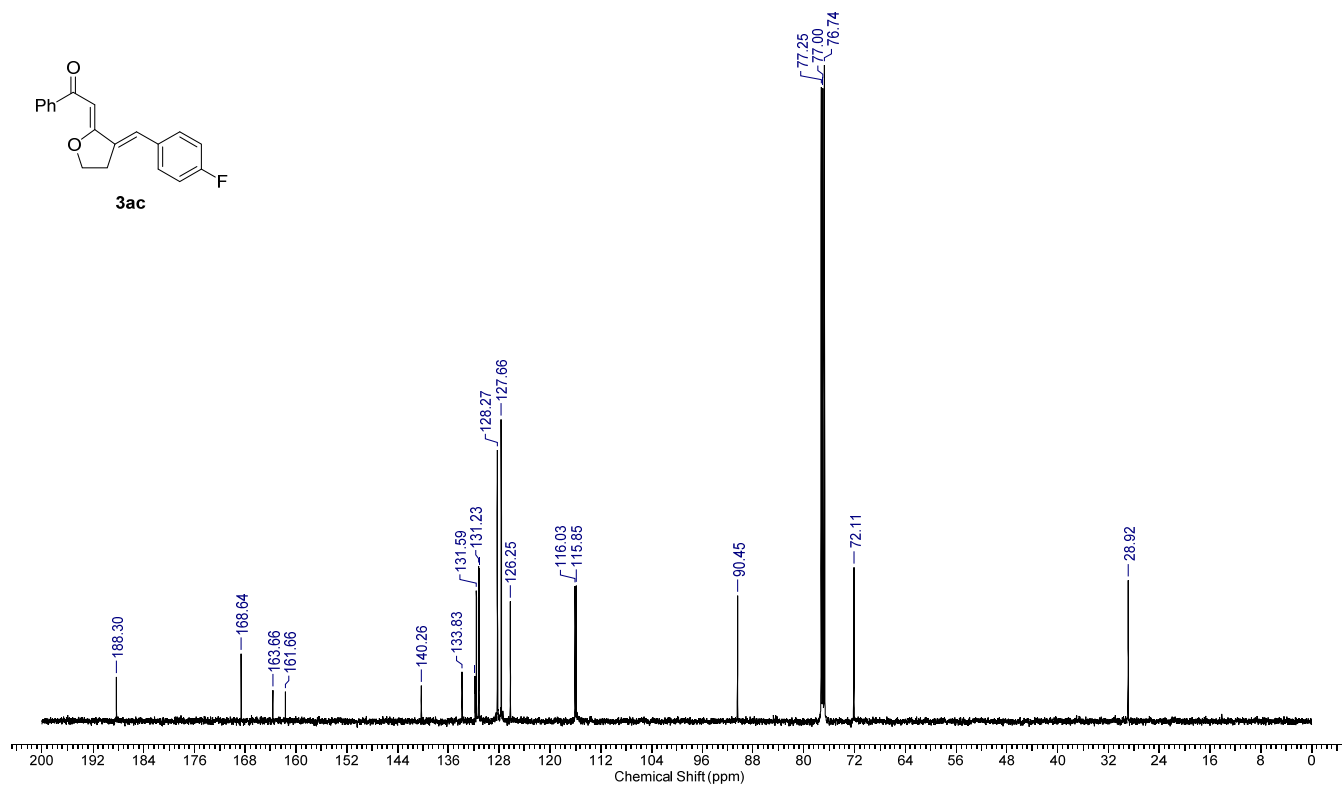

<sup>1</sup>H NMR of **3ad**

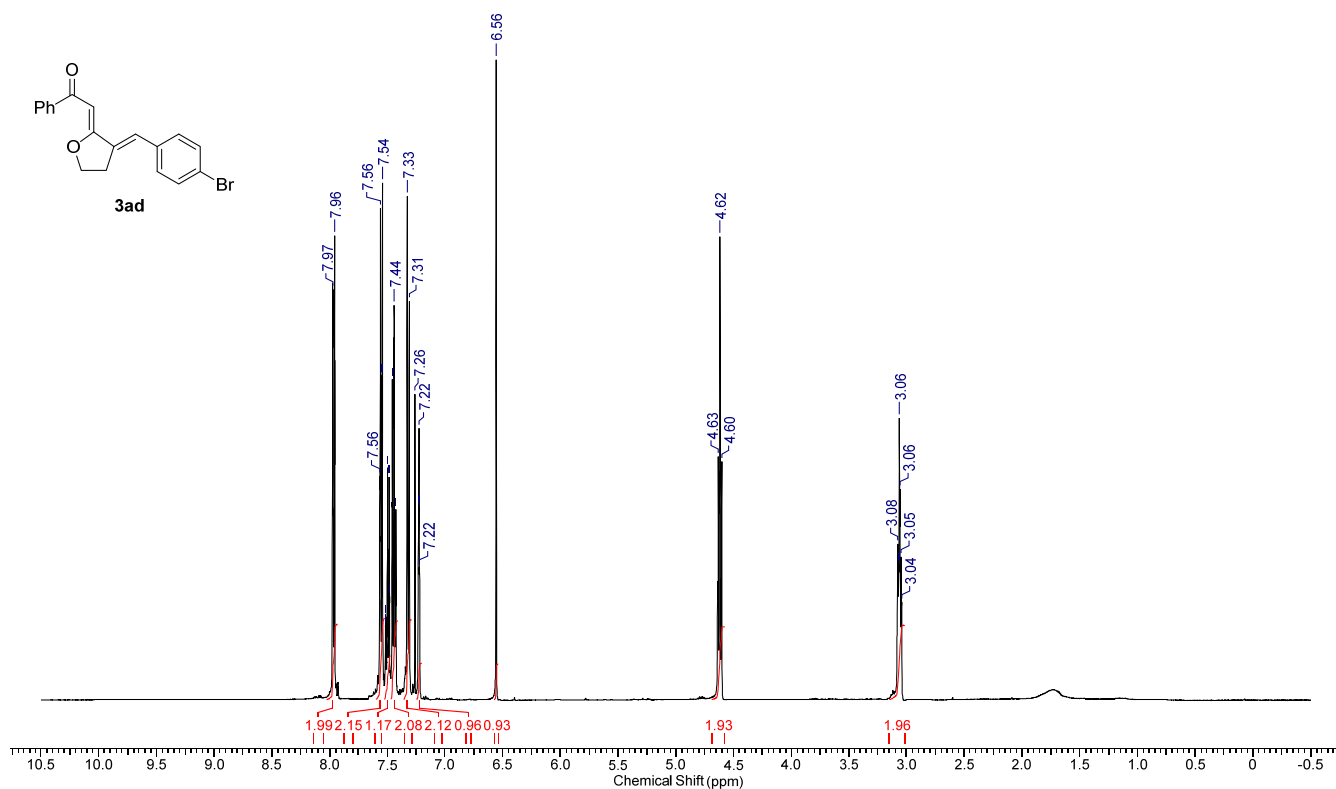

<sup>13</sup>C NMR of **3ad**

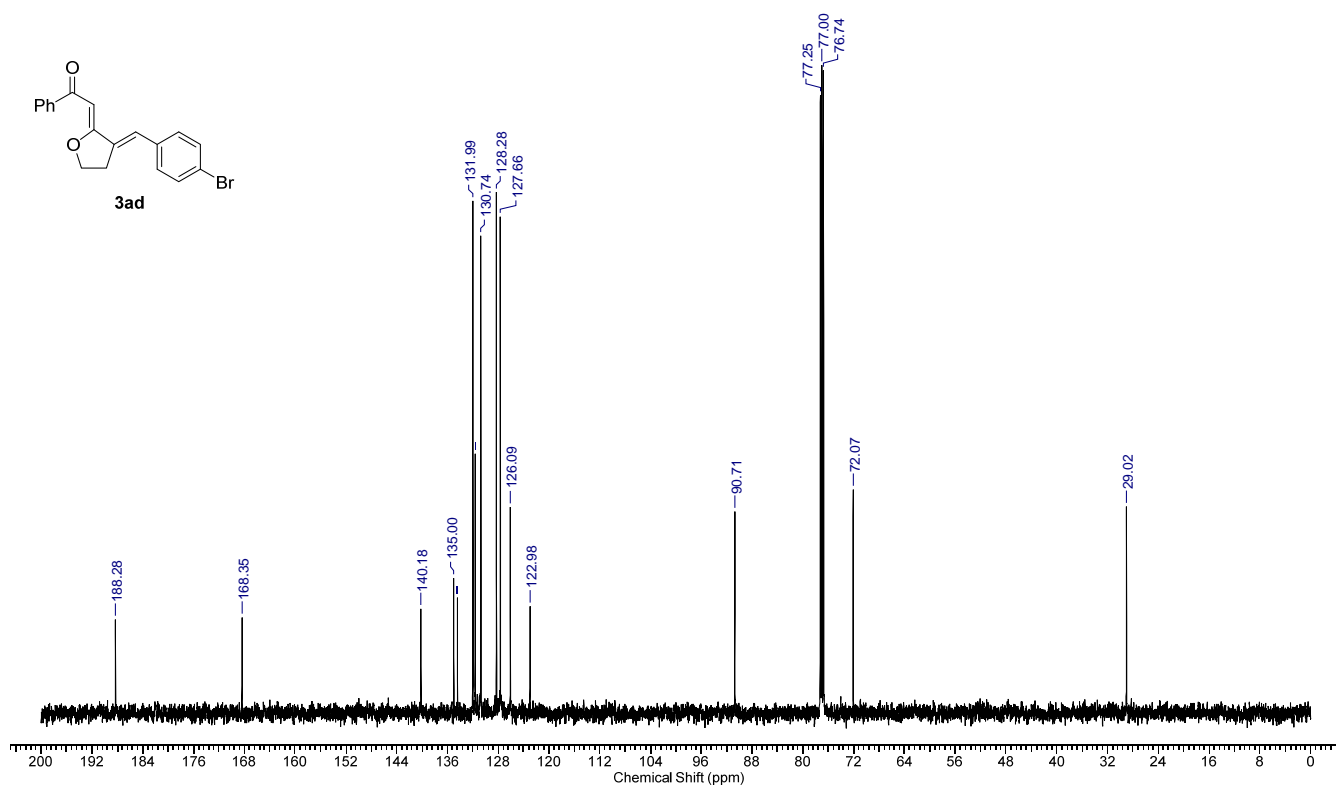

<sup>1</sup>H NMR of **3ae**

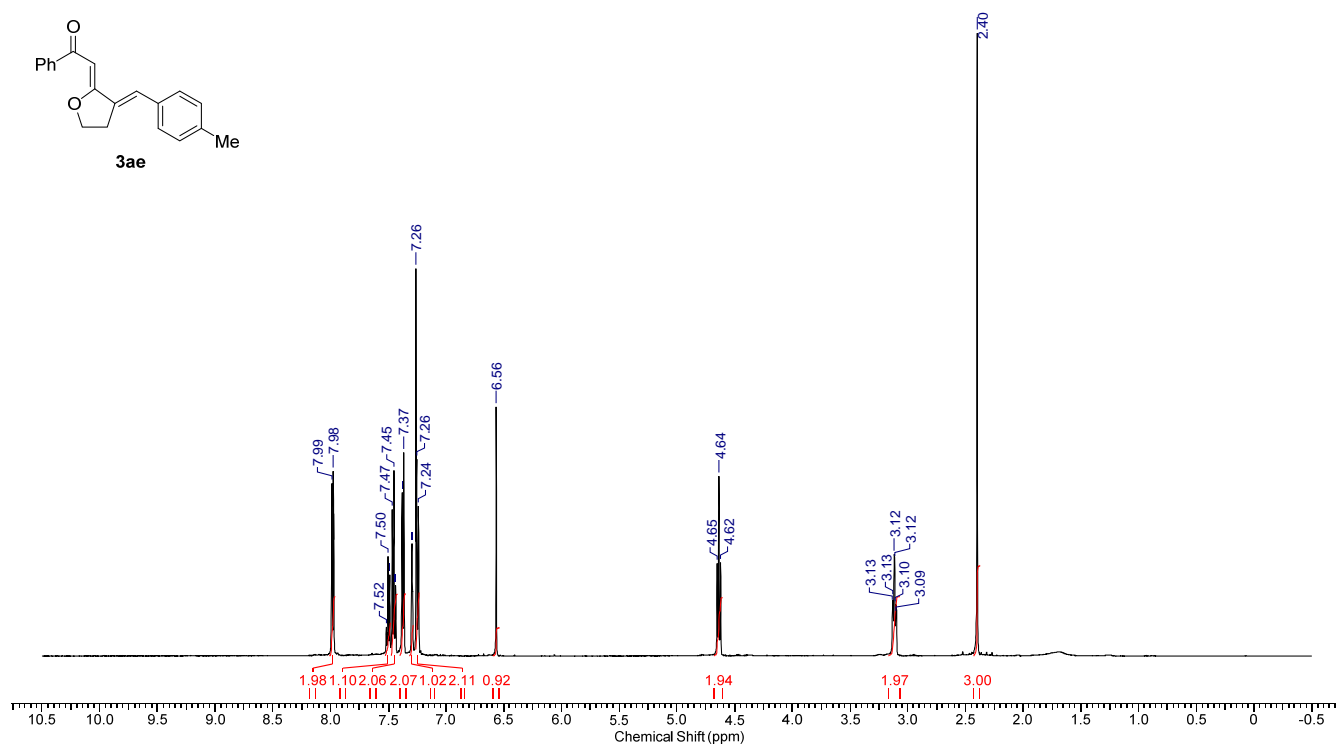

<sup>13</sup>C NMR of **3ae**

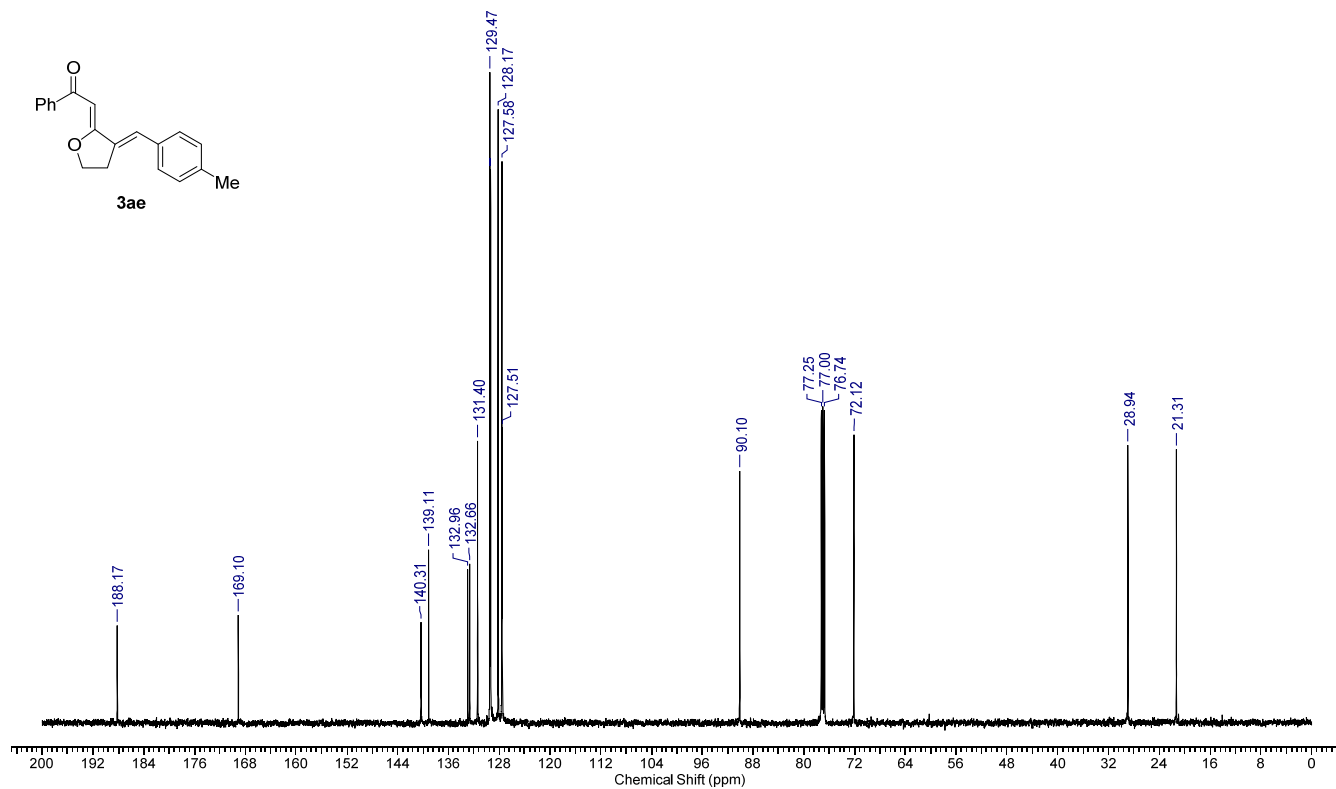



<sup>1</sup>H NMR of **3af**

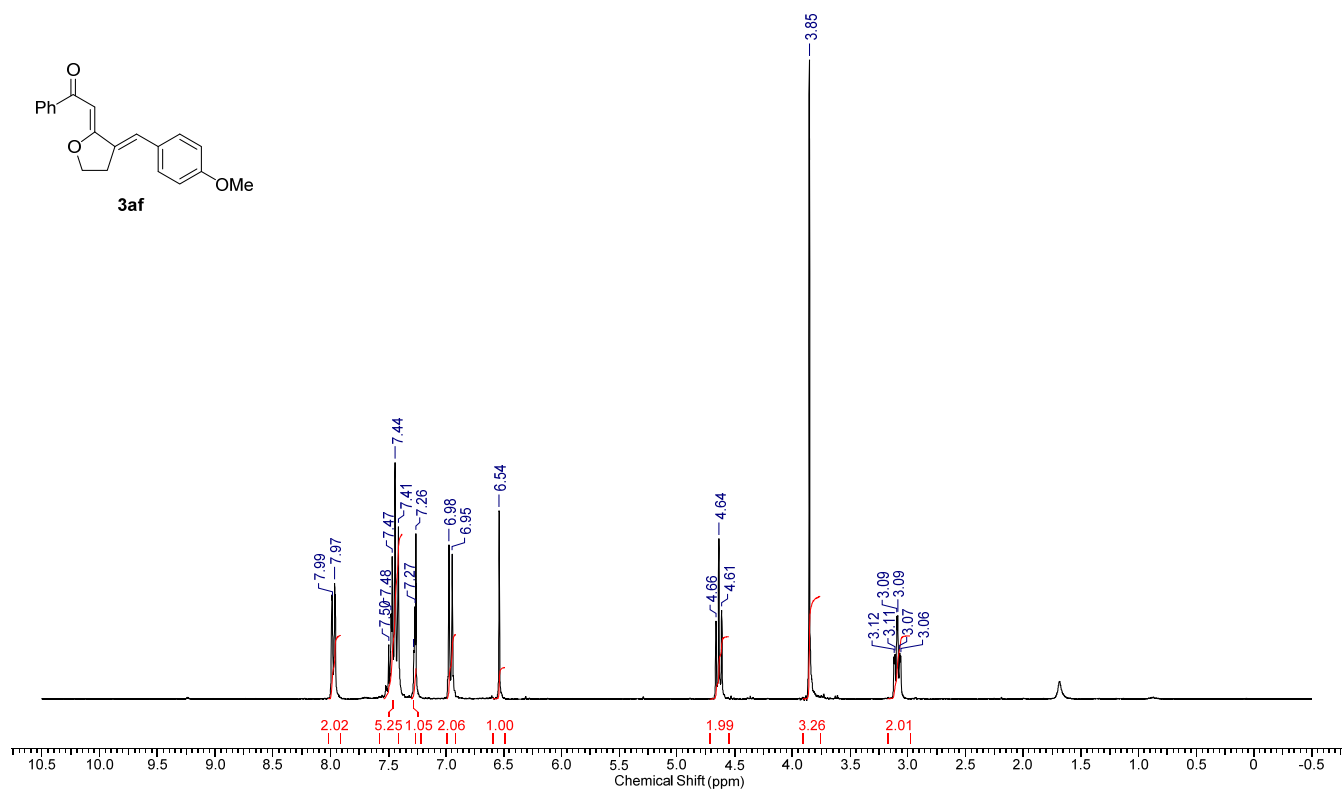

<sup>13</sup>C NMR of **3af**

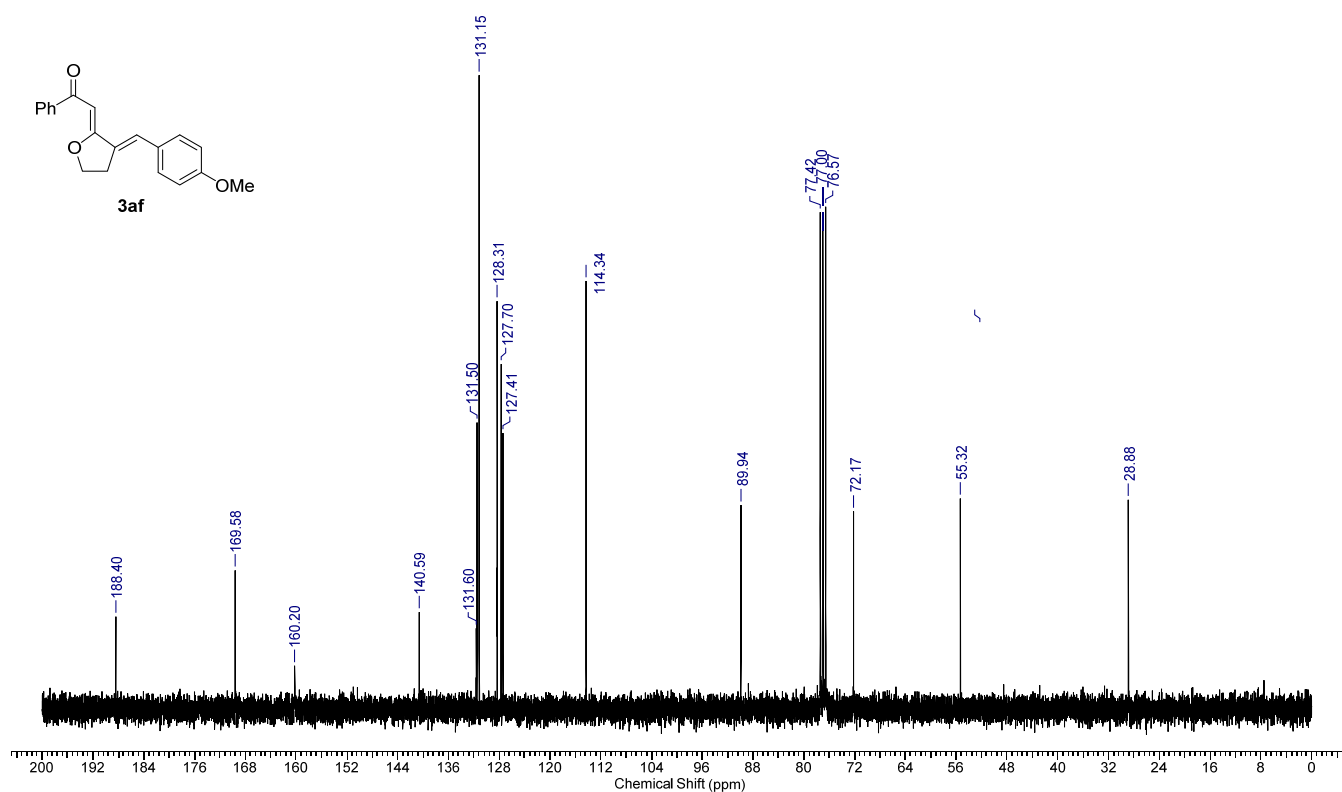

<sup>1</sup>H NMR of **3ag**

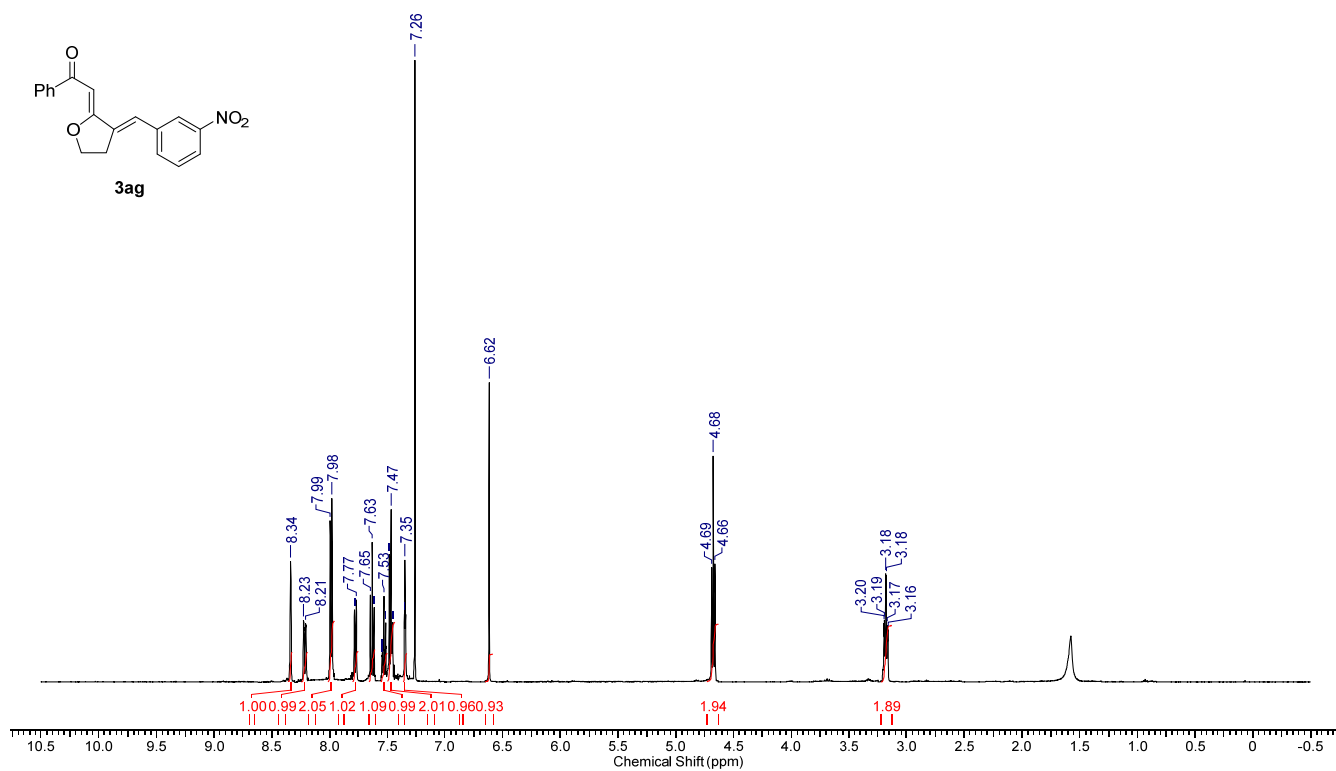

<sup>13</sup>C NMR of **3ag**

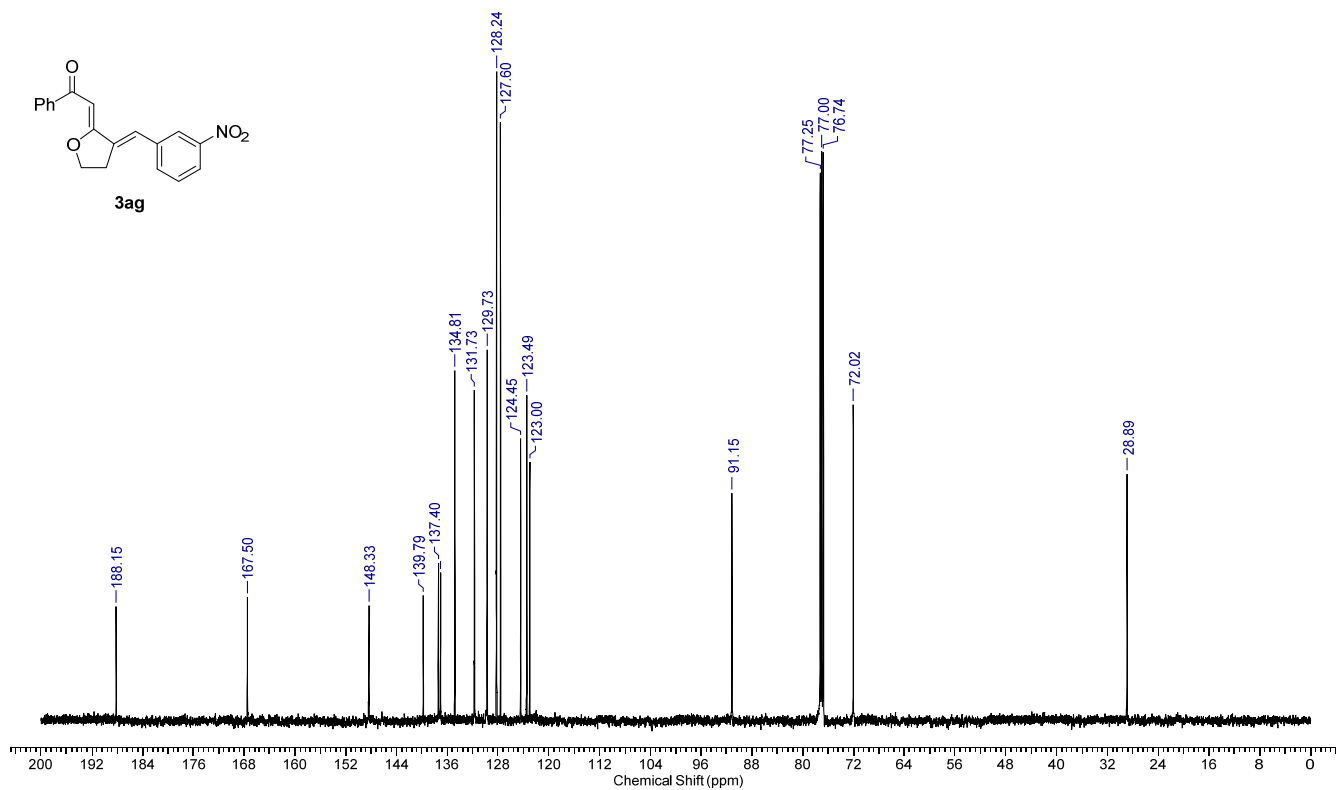

<sup>1</sup>H NMR of **3ah**

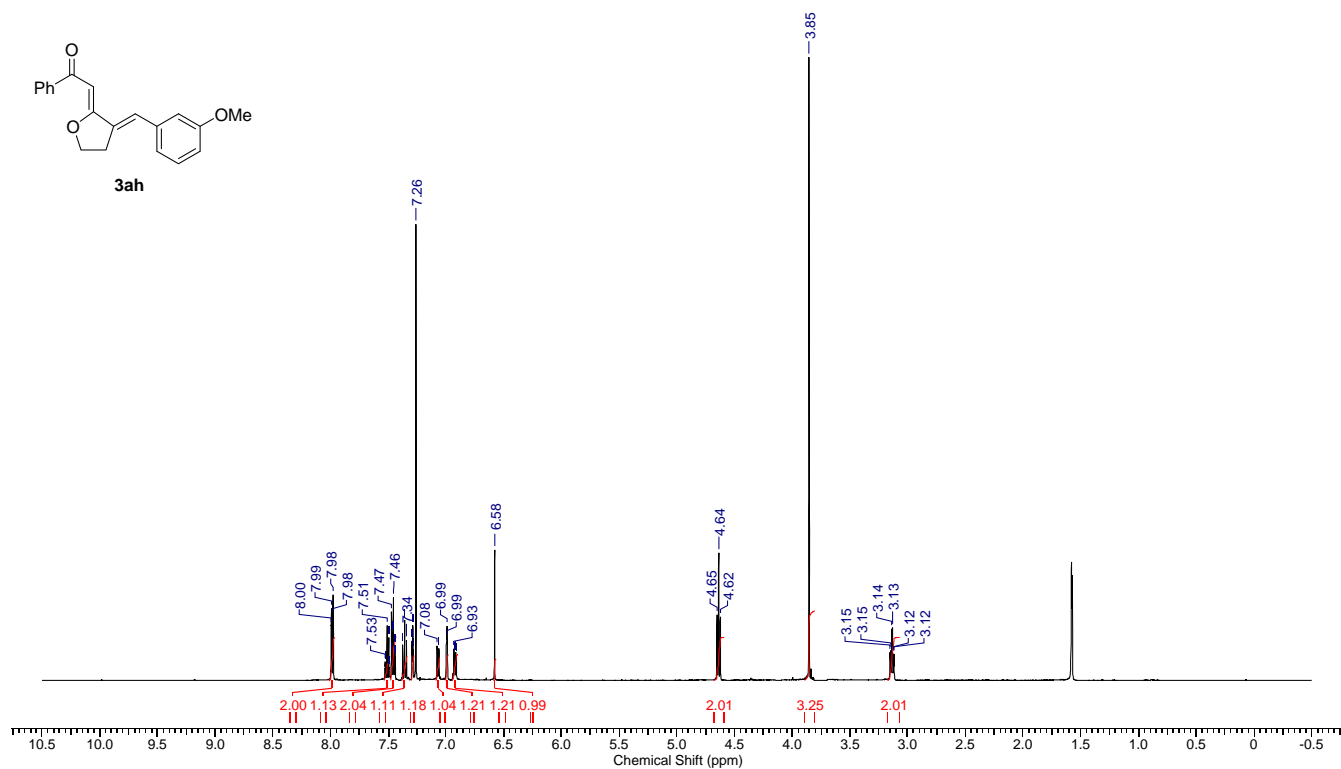

<sup>13</sup>C NMR of **3ah**

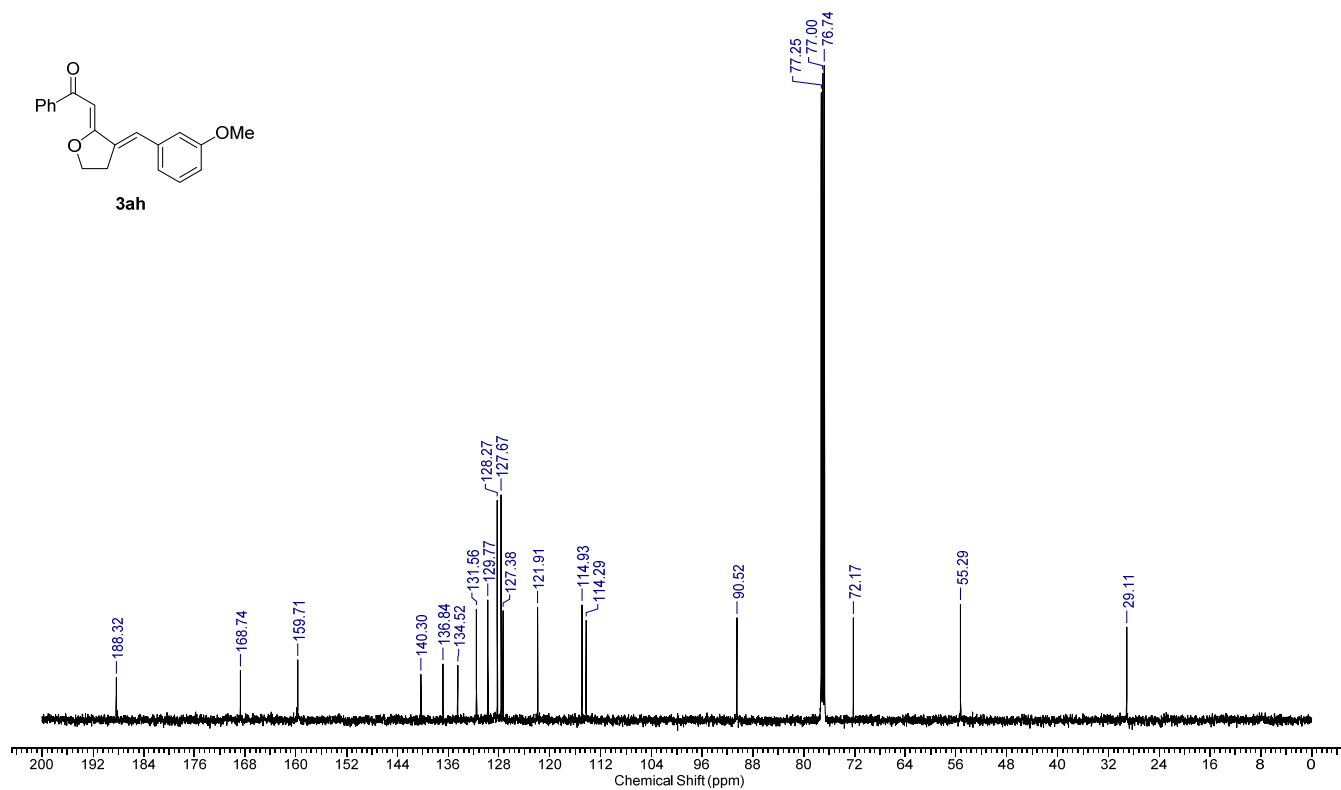

<sup>1</sup>H NMR of **3ai**

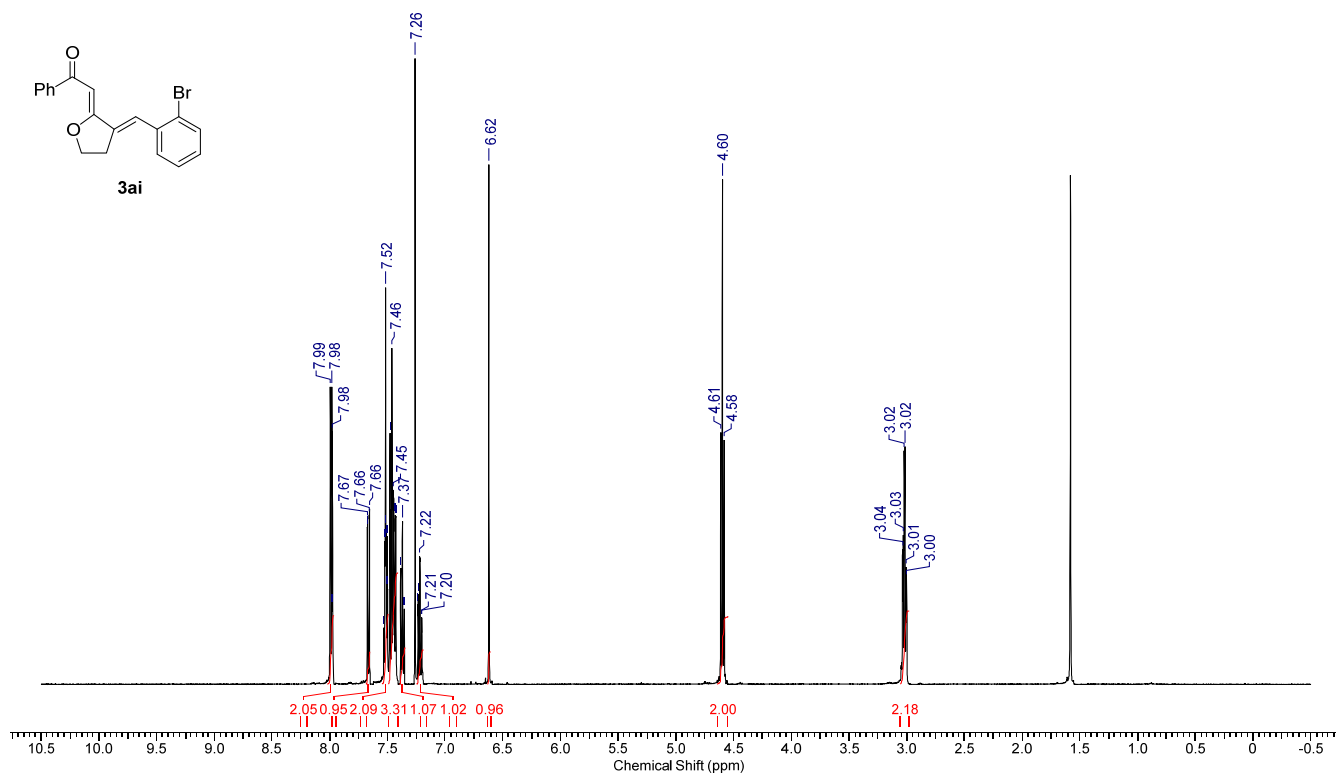

<sup>13</sup>C NMR of **3ai**

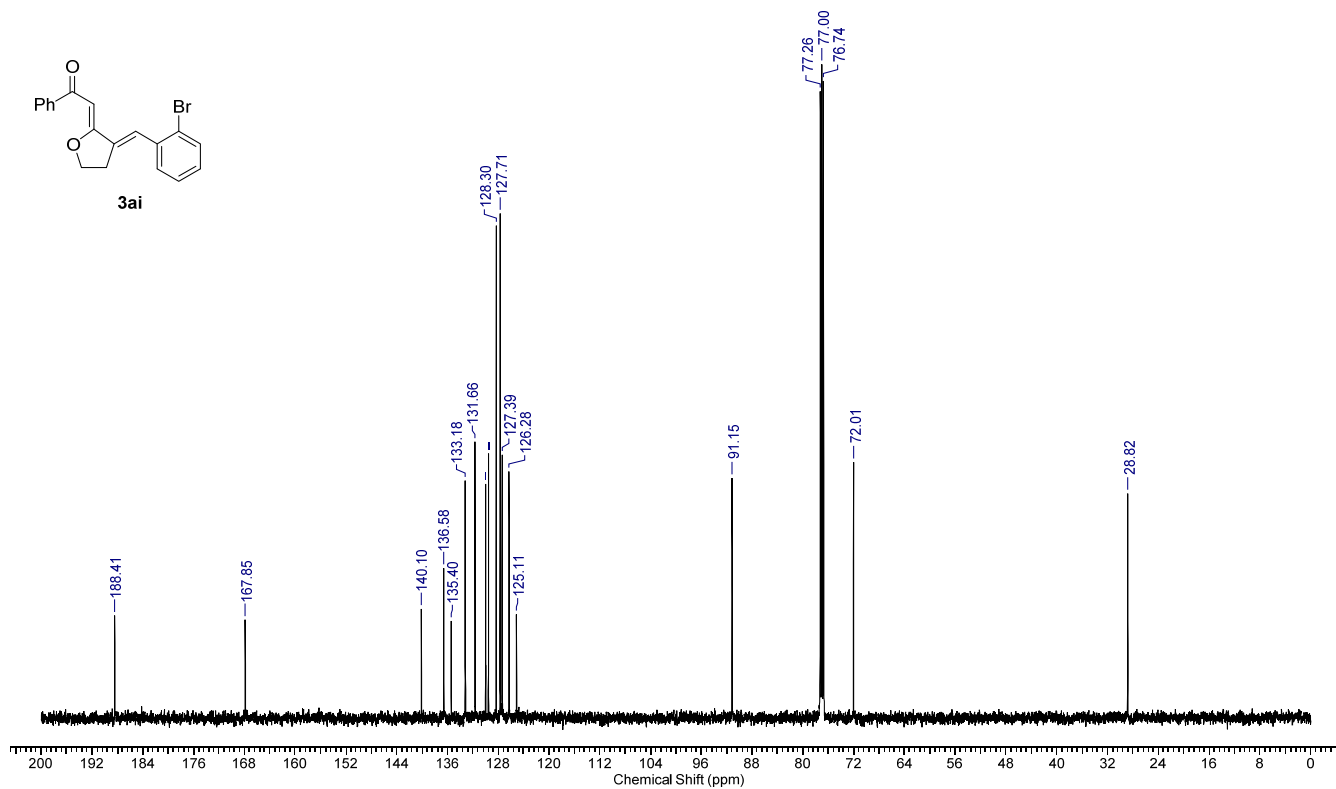

<sup>1</sup>H NMR of **3aj**

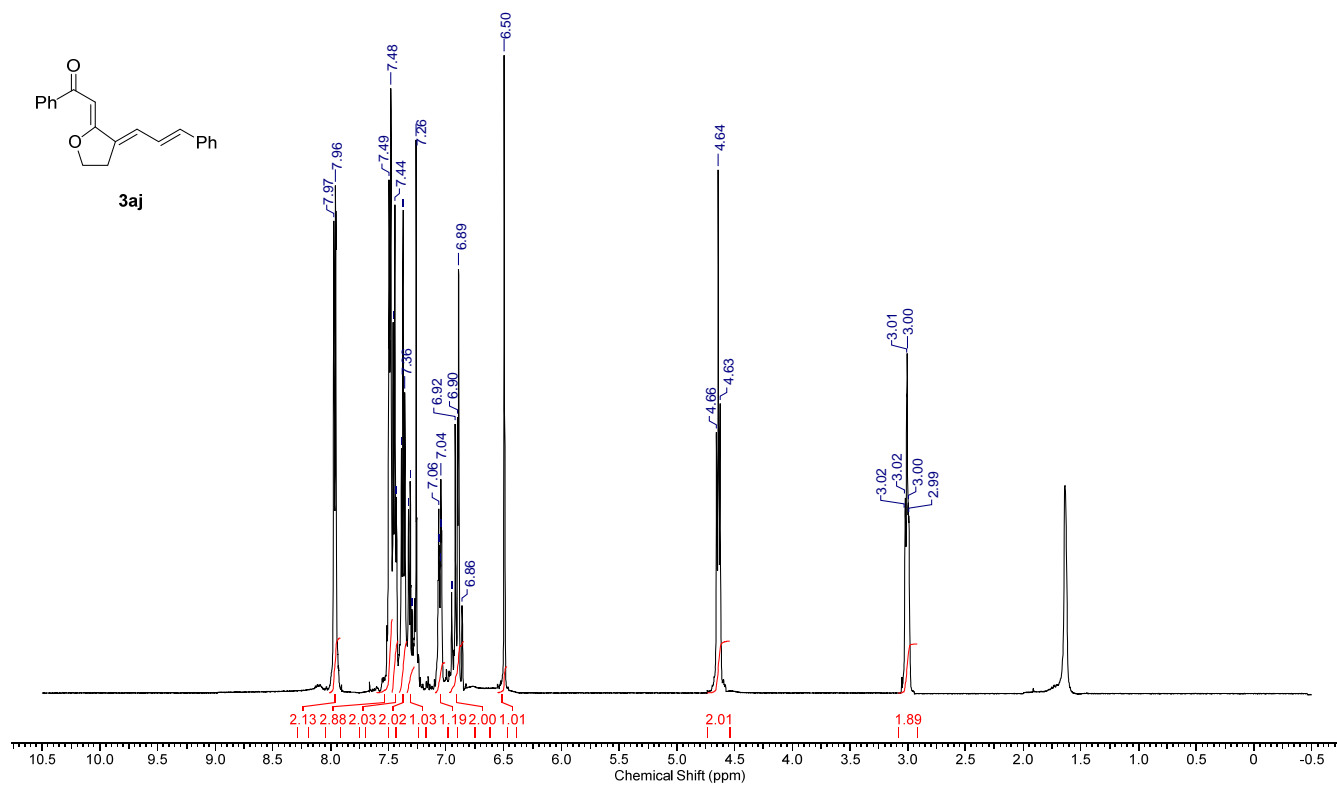

<sup>13</sup>C NMR of **3aj**

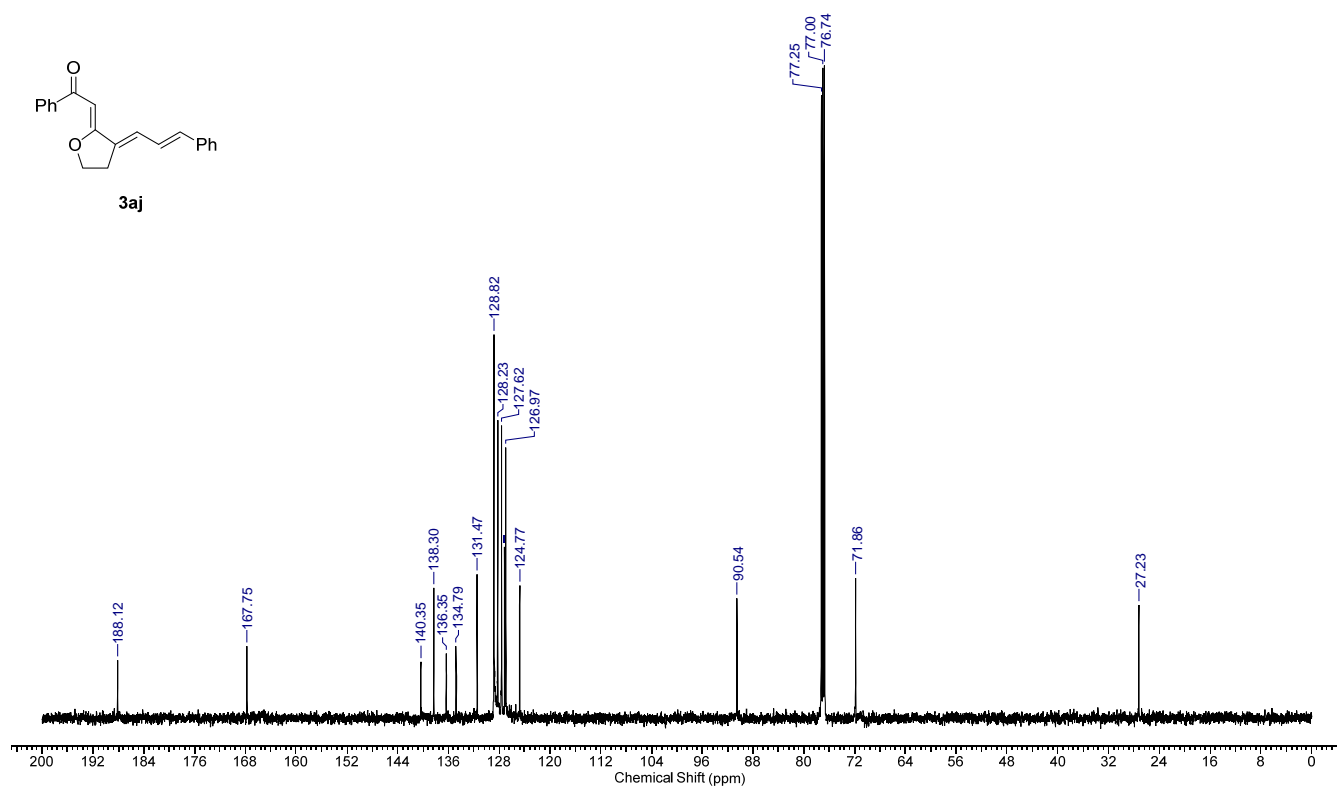

<sup>1</sup>H NMR of **3ak**

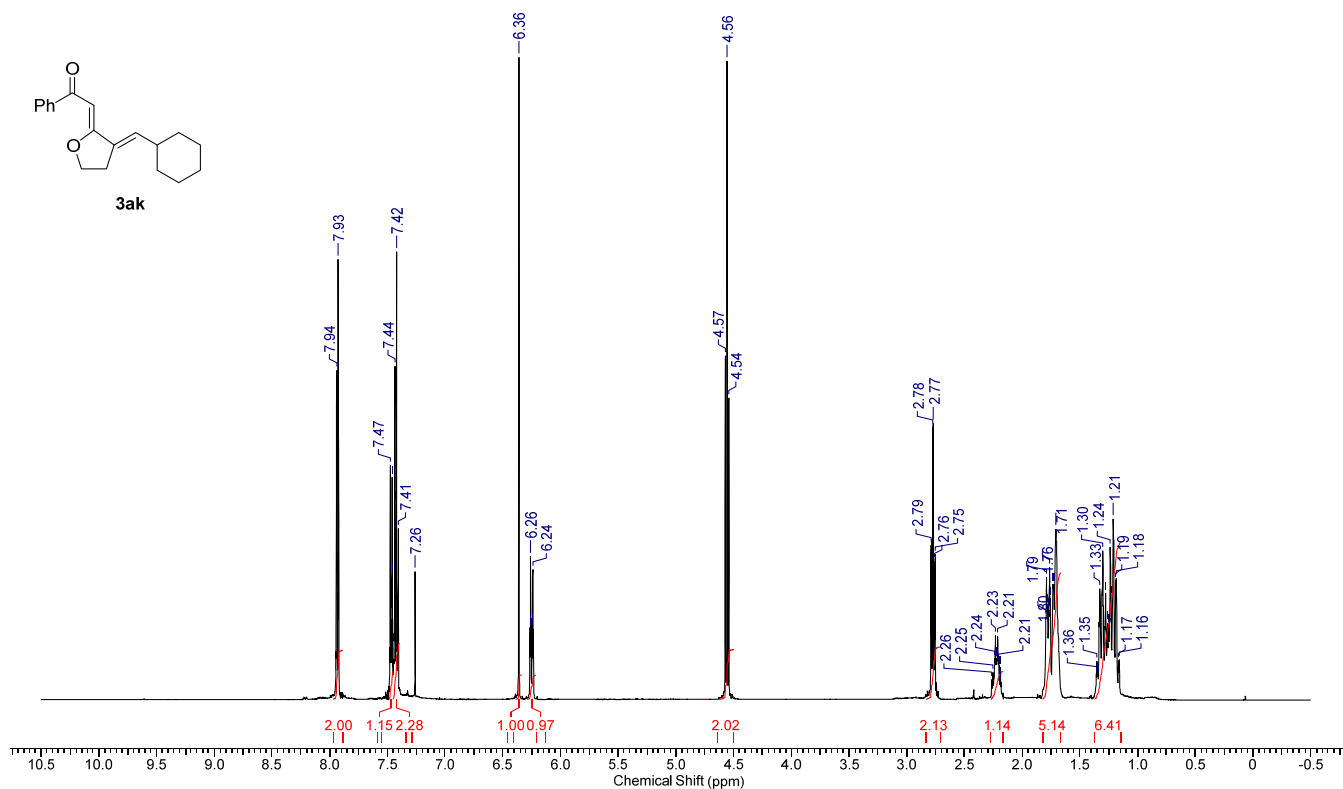

<sup>13</sup>C NMR of **3ak**

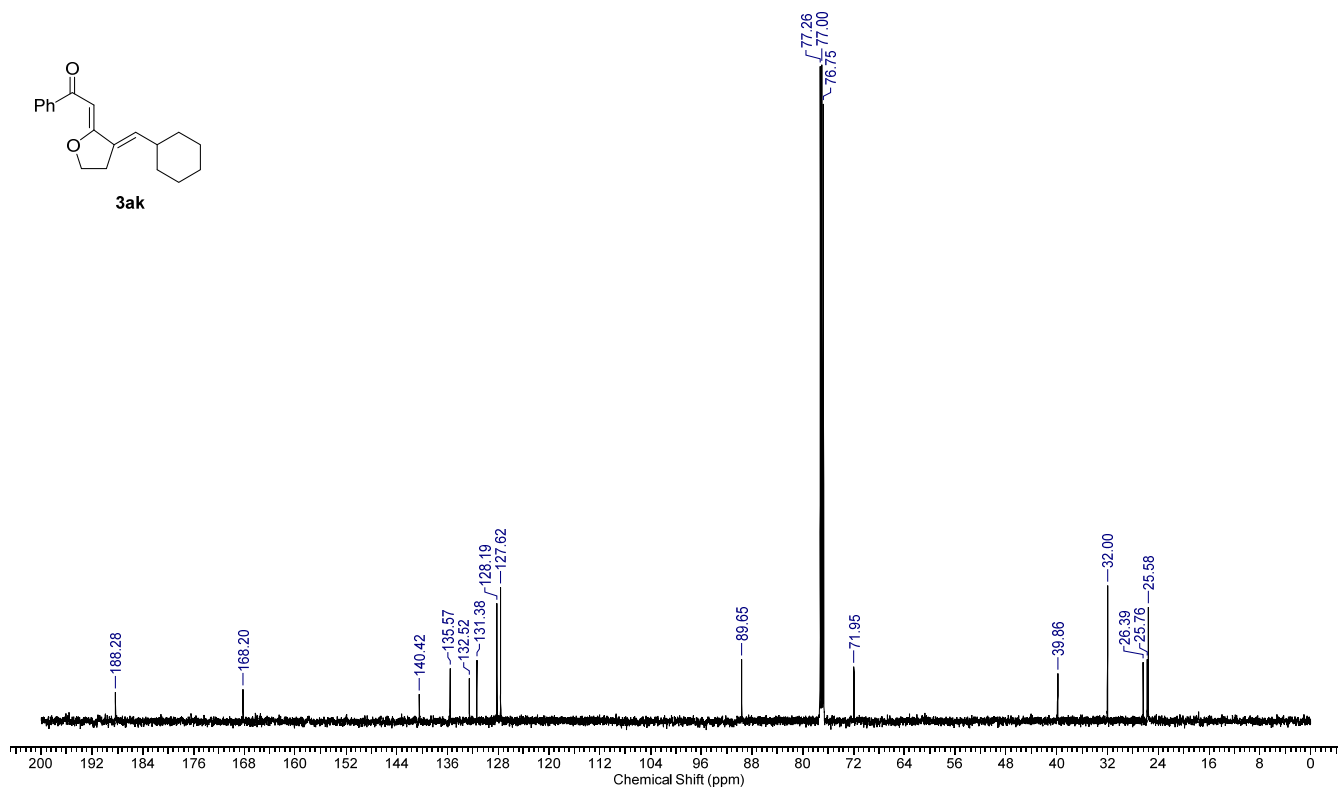

<sup>1</sup>H NMR of **3al**

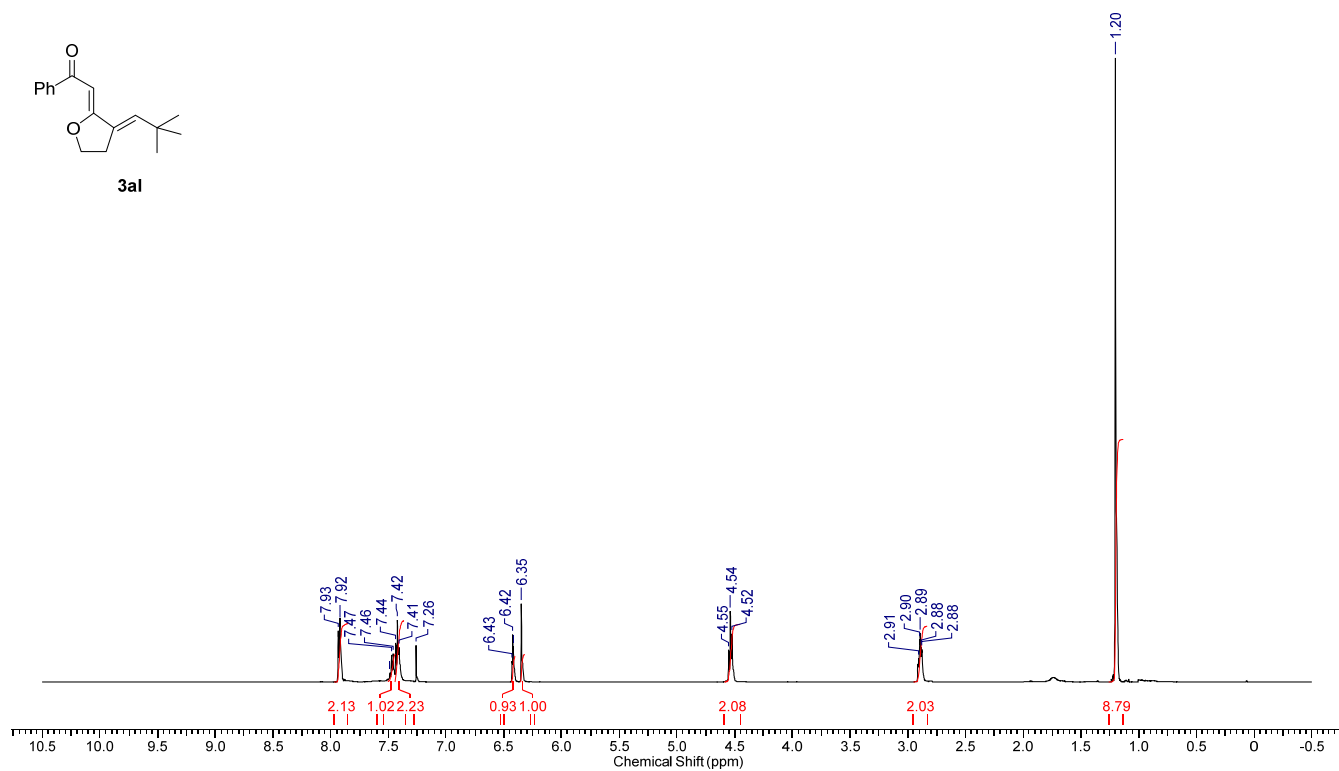

<sup>13</sup>C NMR of **3al**

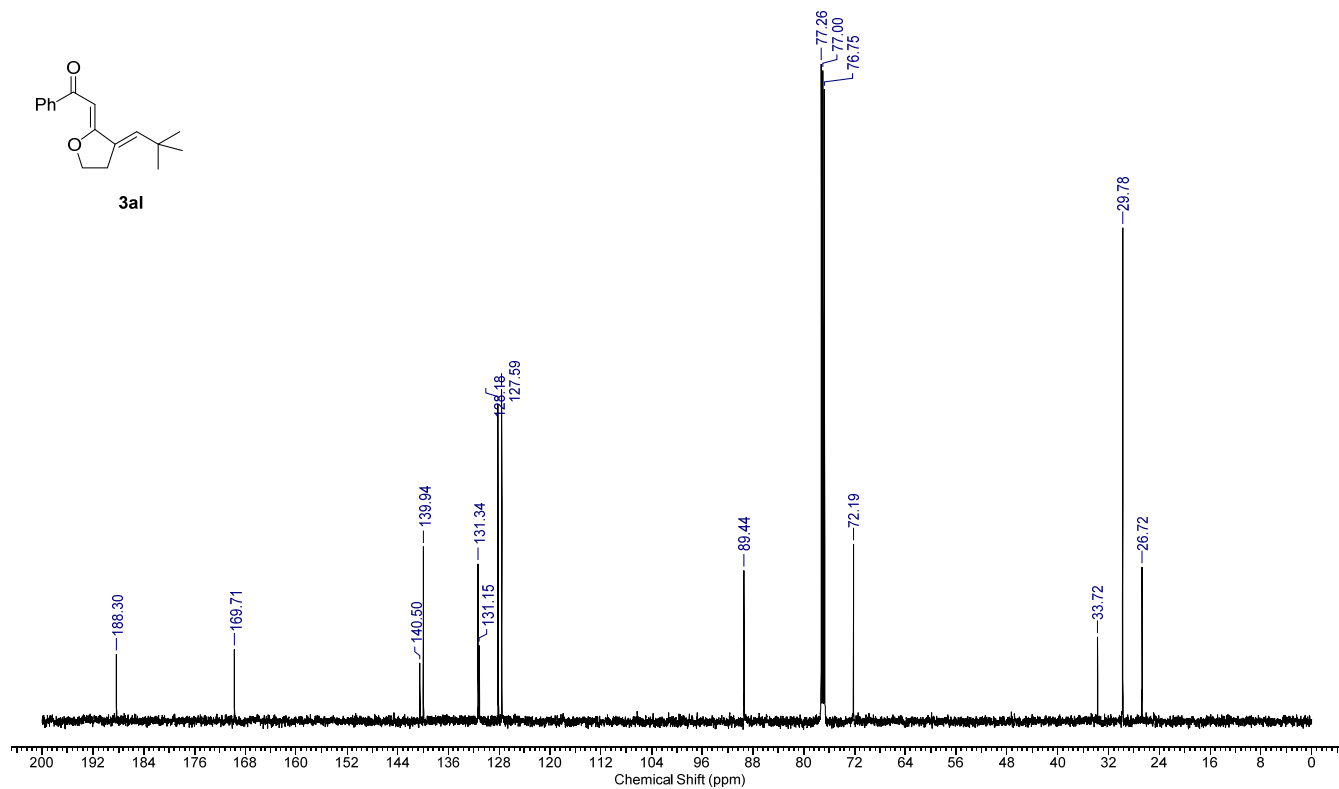

<sup>1</sup>H NMR of **3ba**

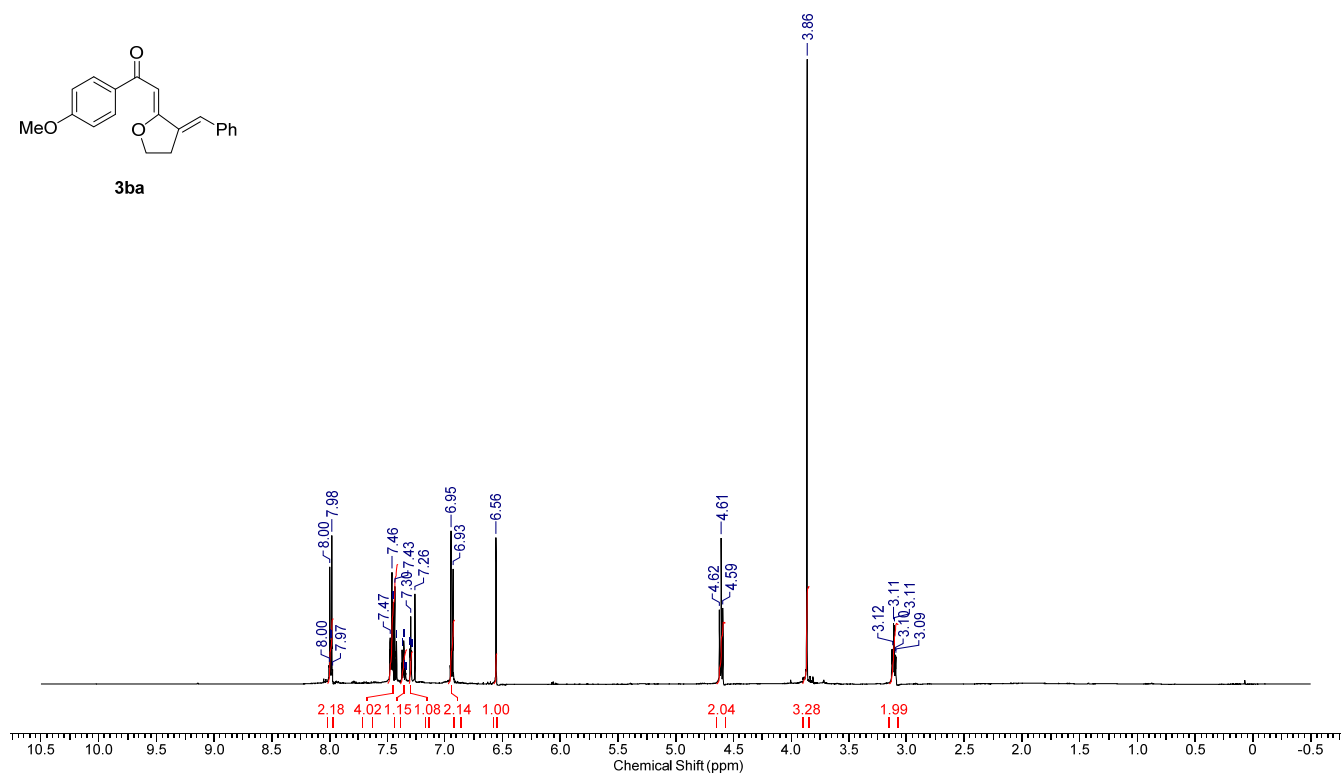

<sup>13</sup>C NMR of **3ba**

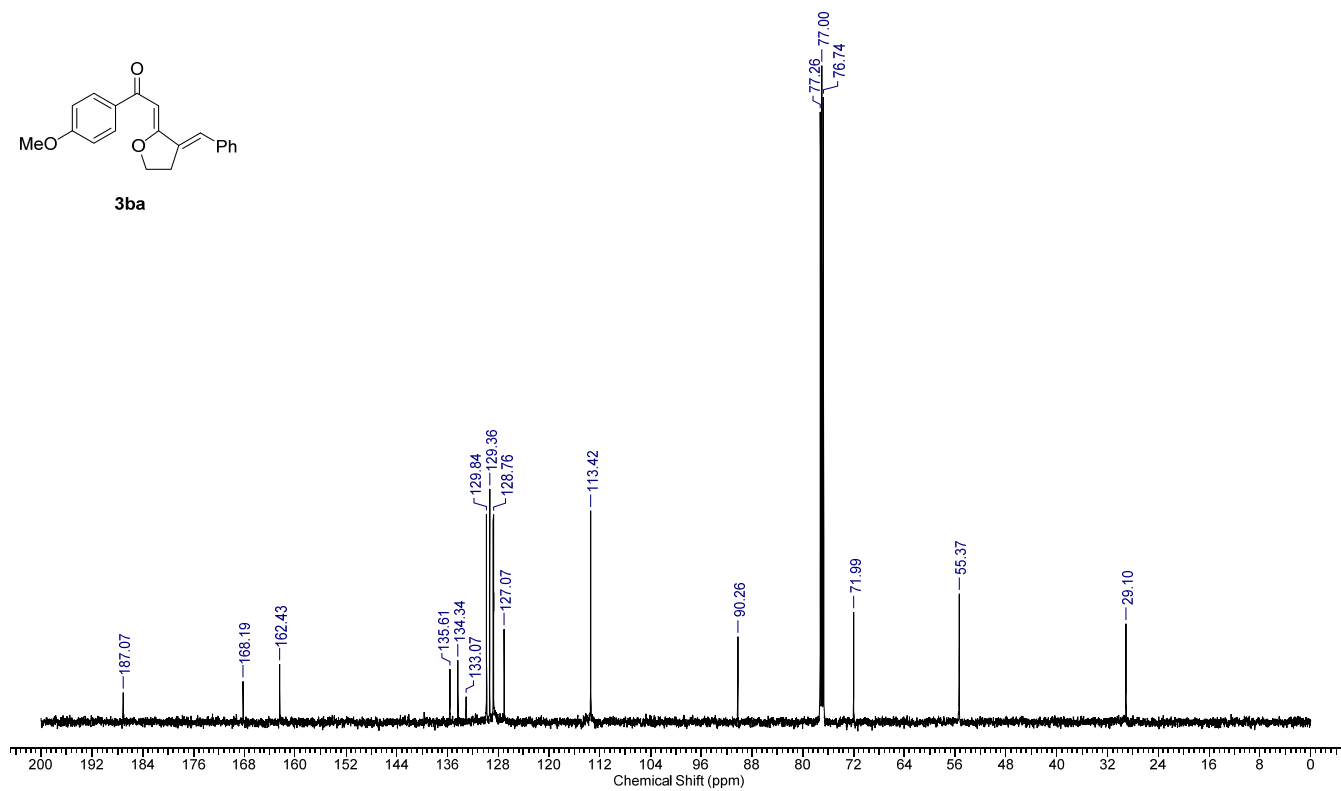



<sup>1</sup>H NMR of **3ca**

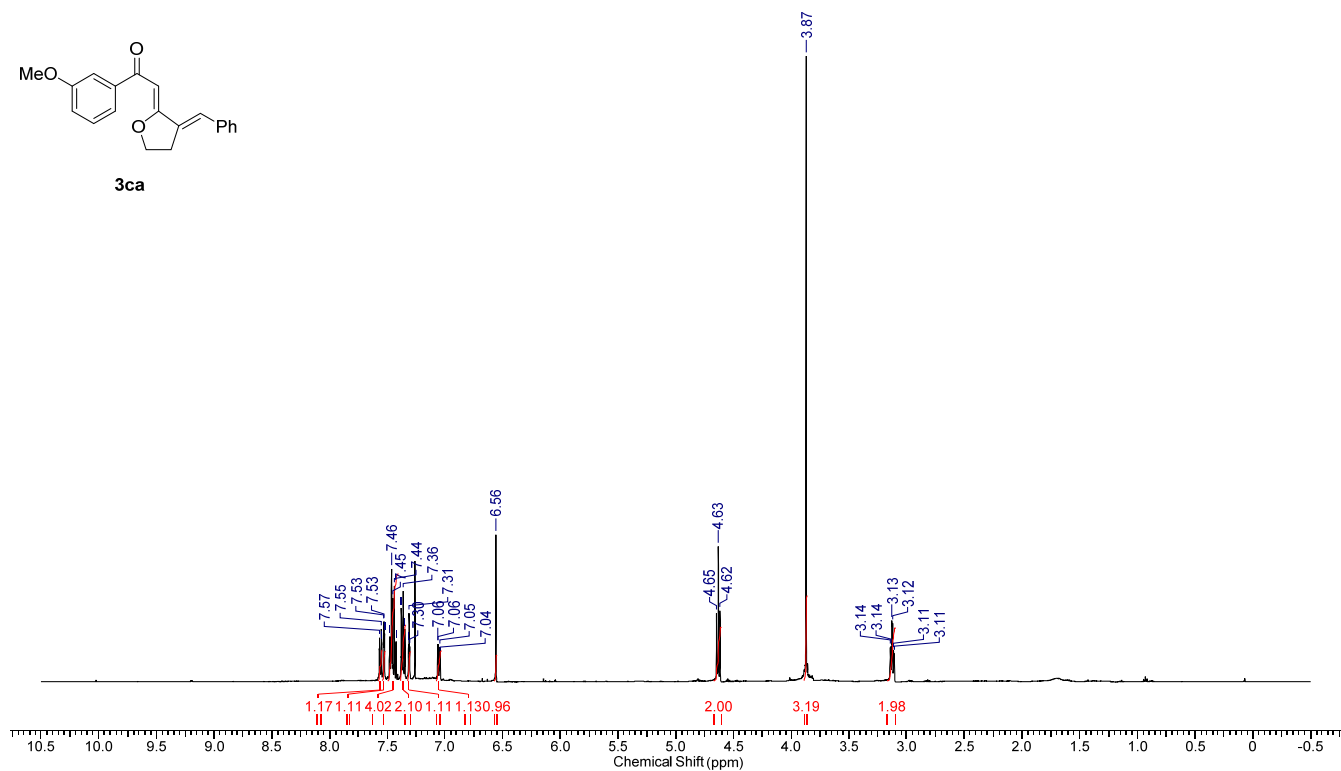

<sup>13</sup>C NMR of **3ca**

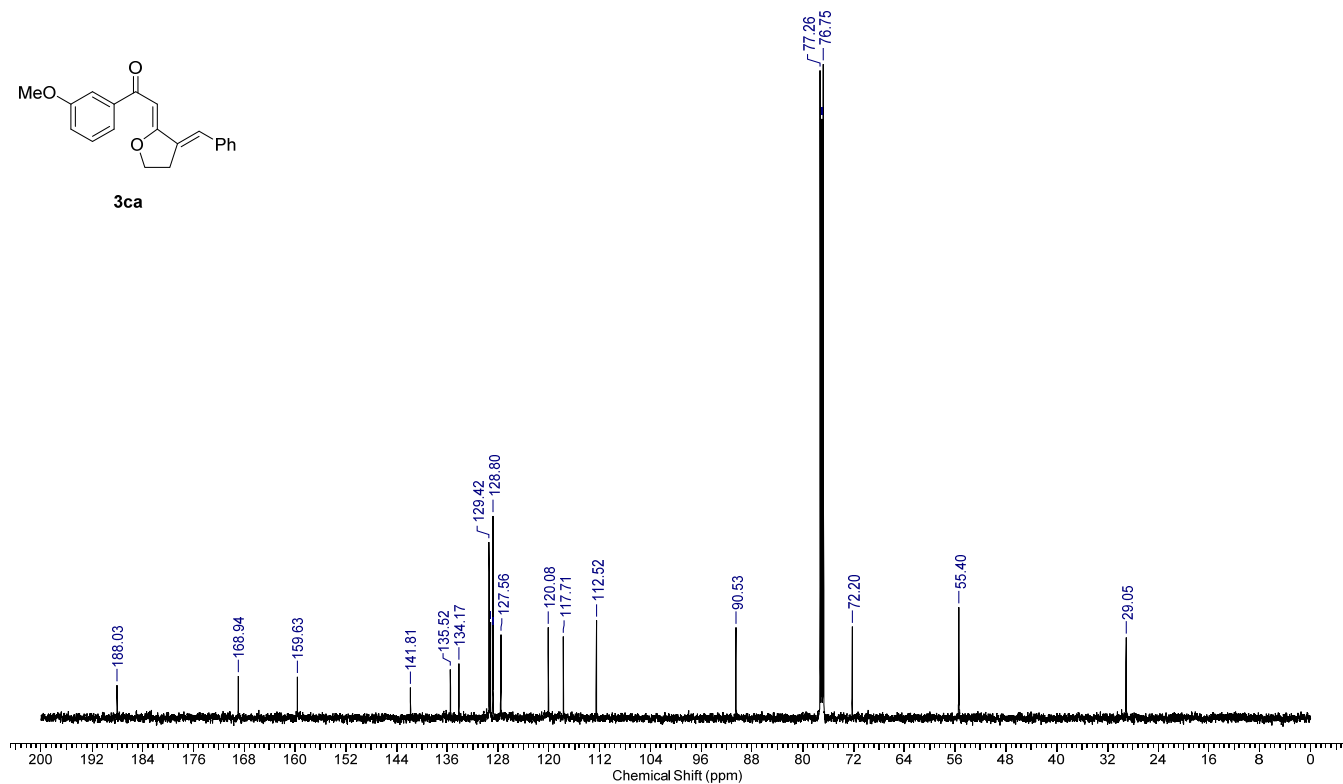

<sup>1</sup>H NMR of **3da**

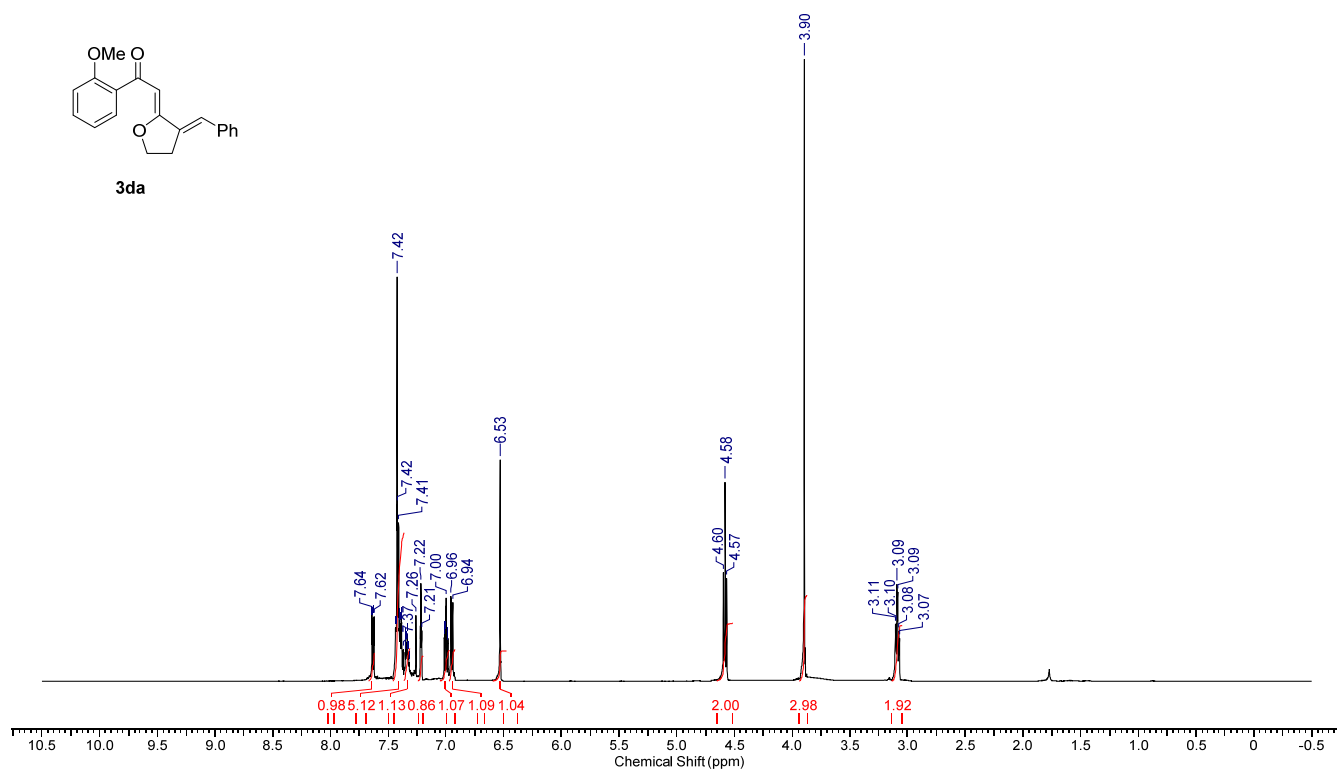

<sup>13</sup>C NMR of **3da**

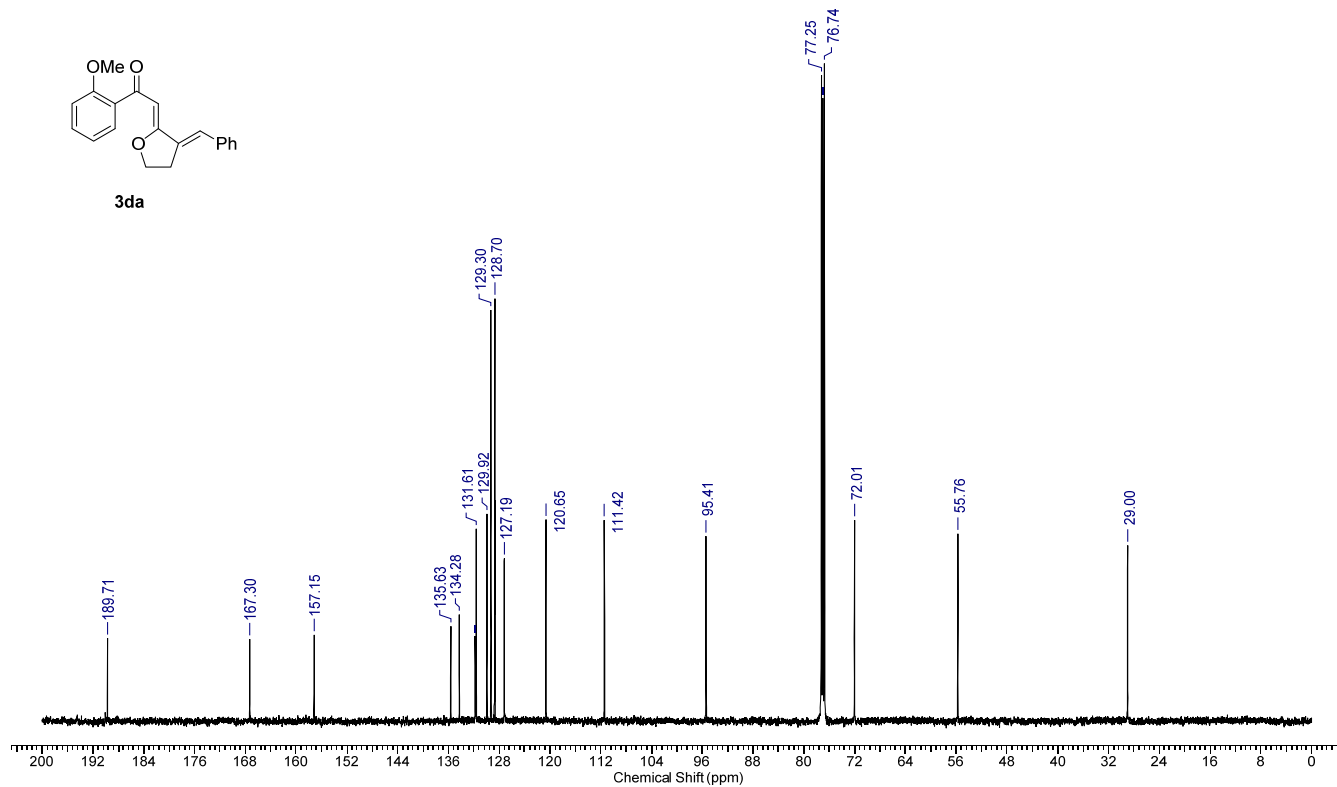

<sup>1</sup>H NMR of **3ea**

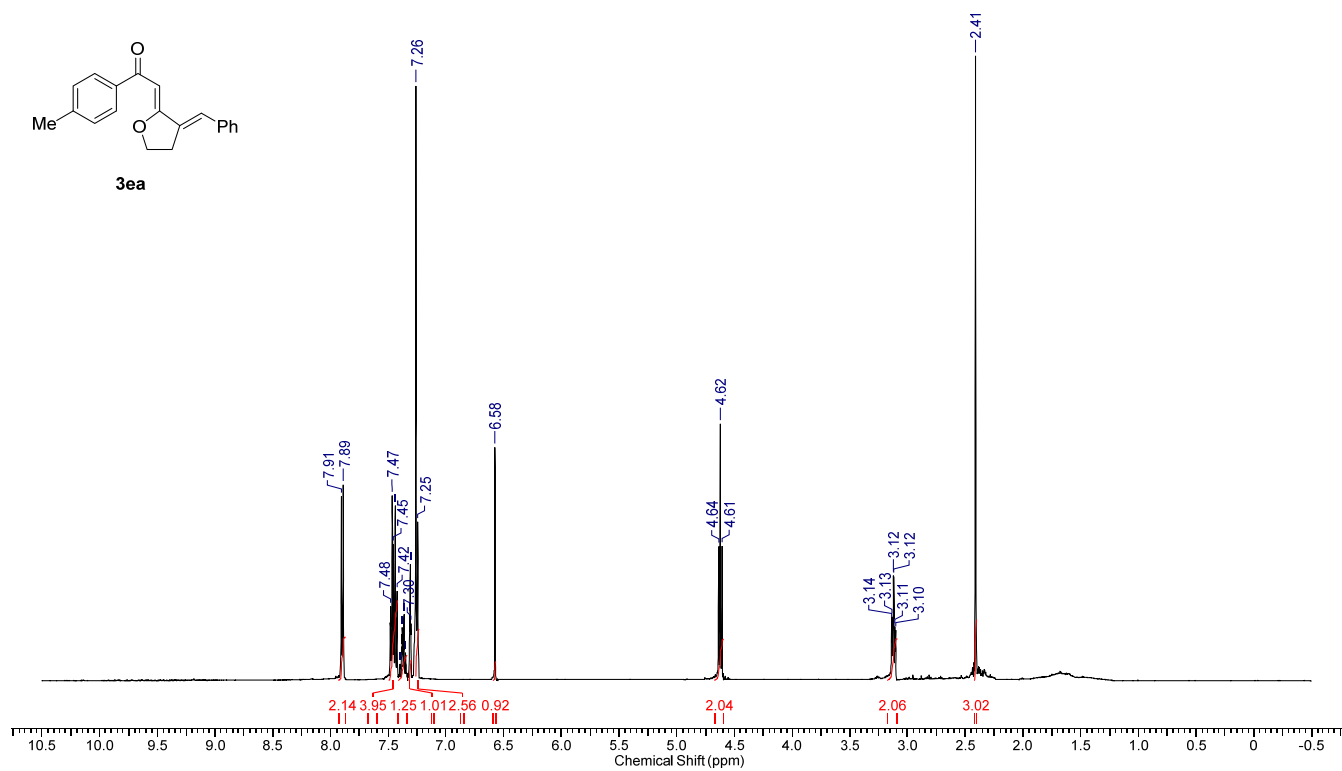

<sup>13</sup>C NMR of **3ea**

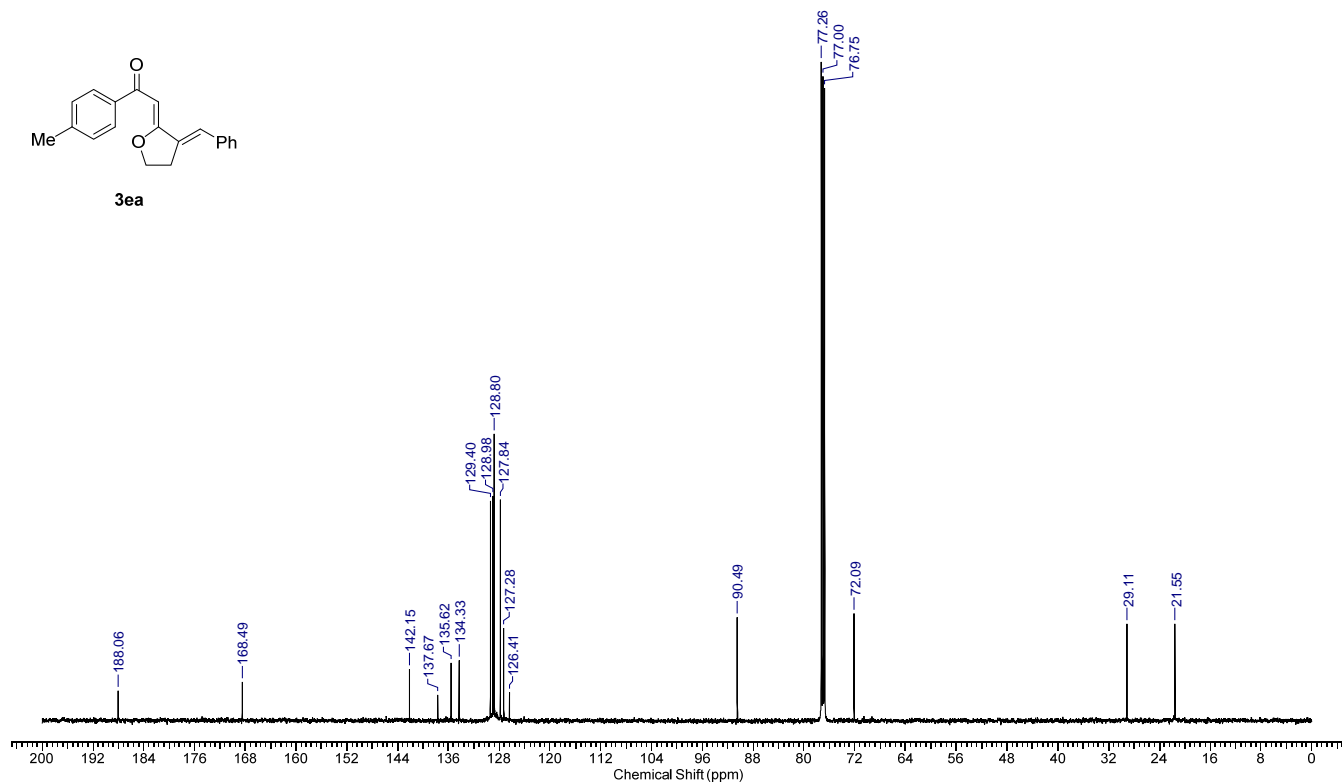

<sup>1</sup>H NMR of **3fa**

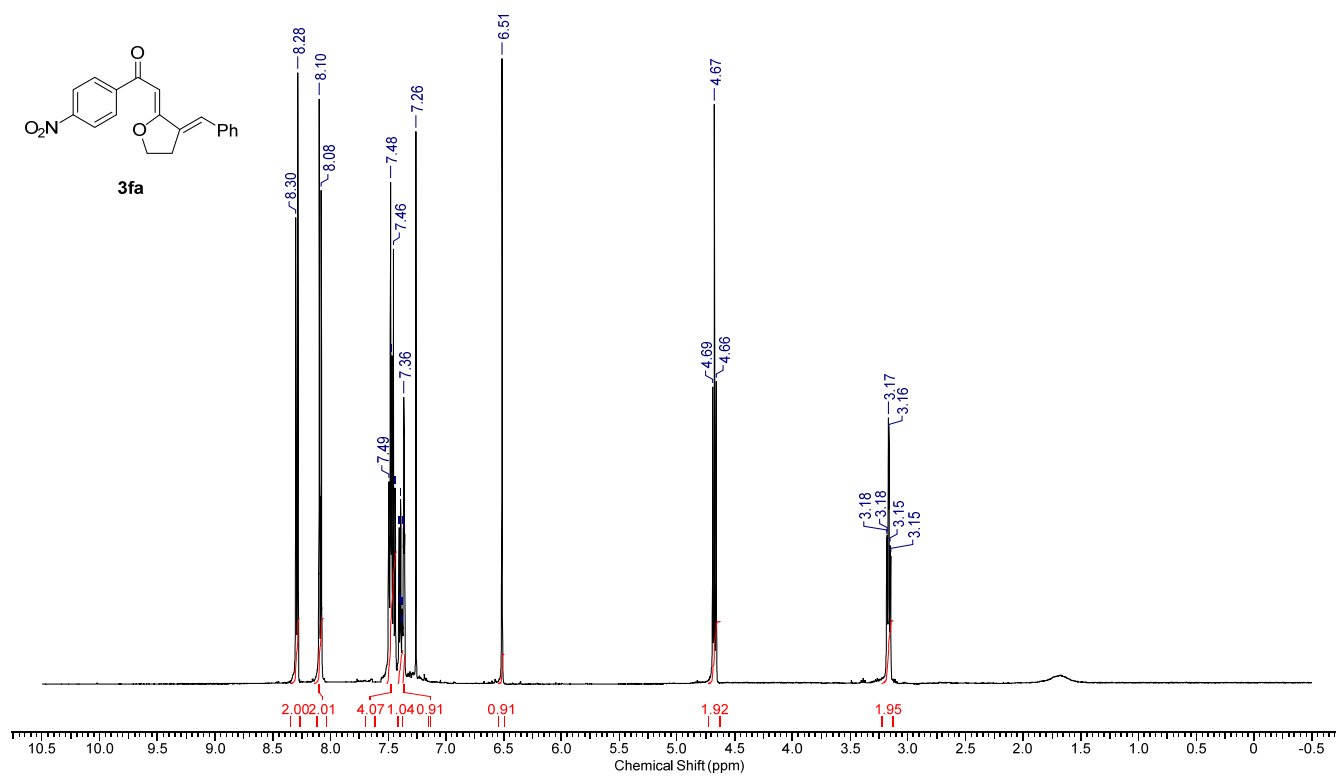

<sup>13</sup>C NMR of **3fa**

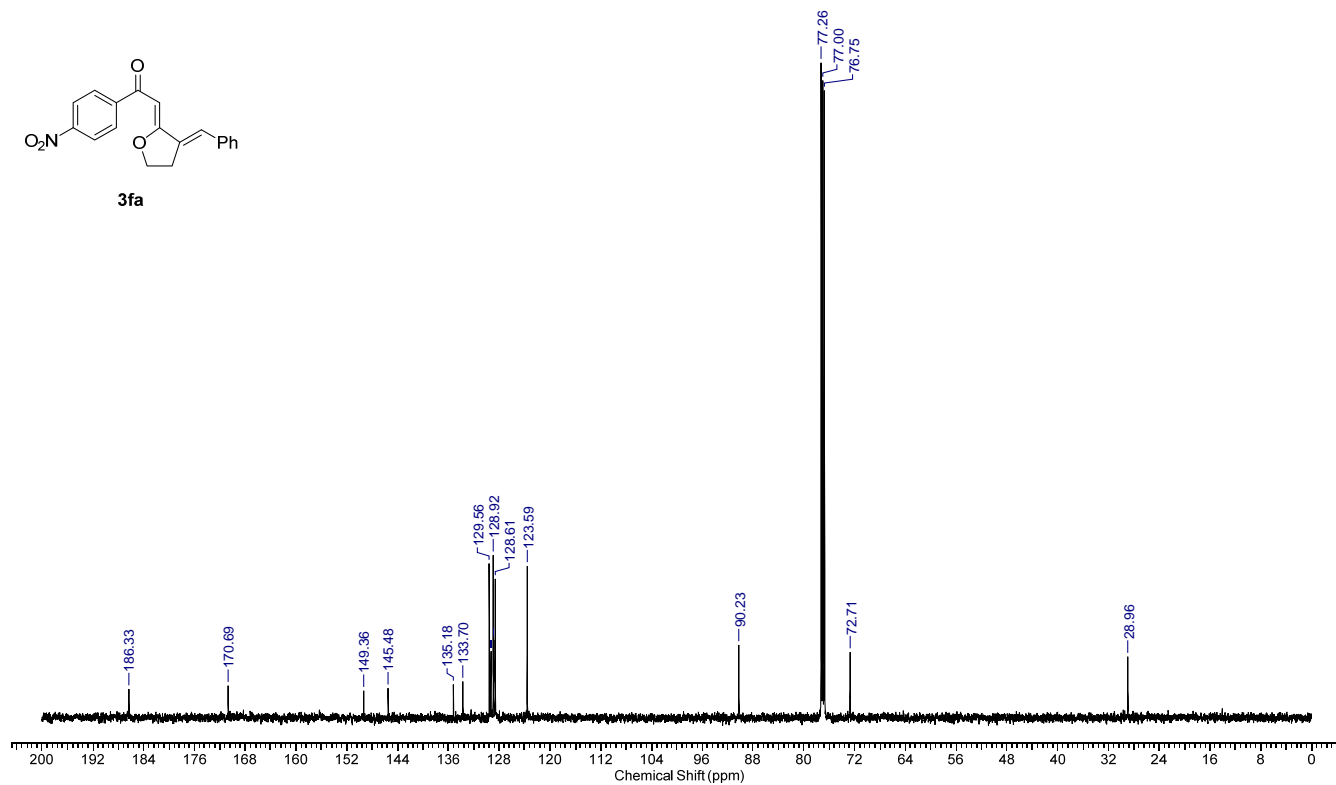

<sup>1</sup>H NMR of **3ga**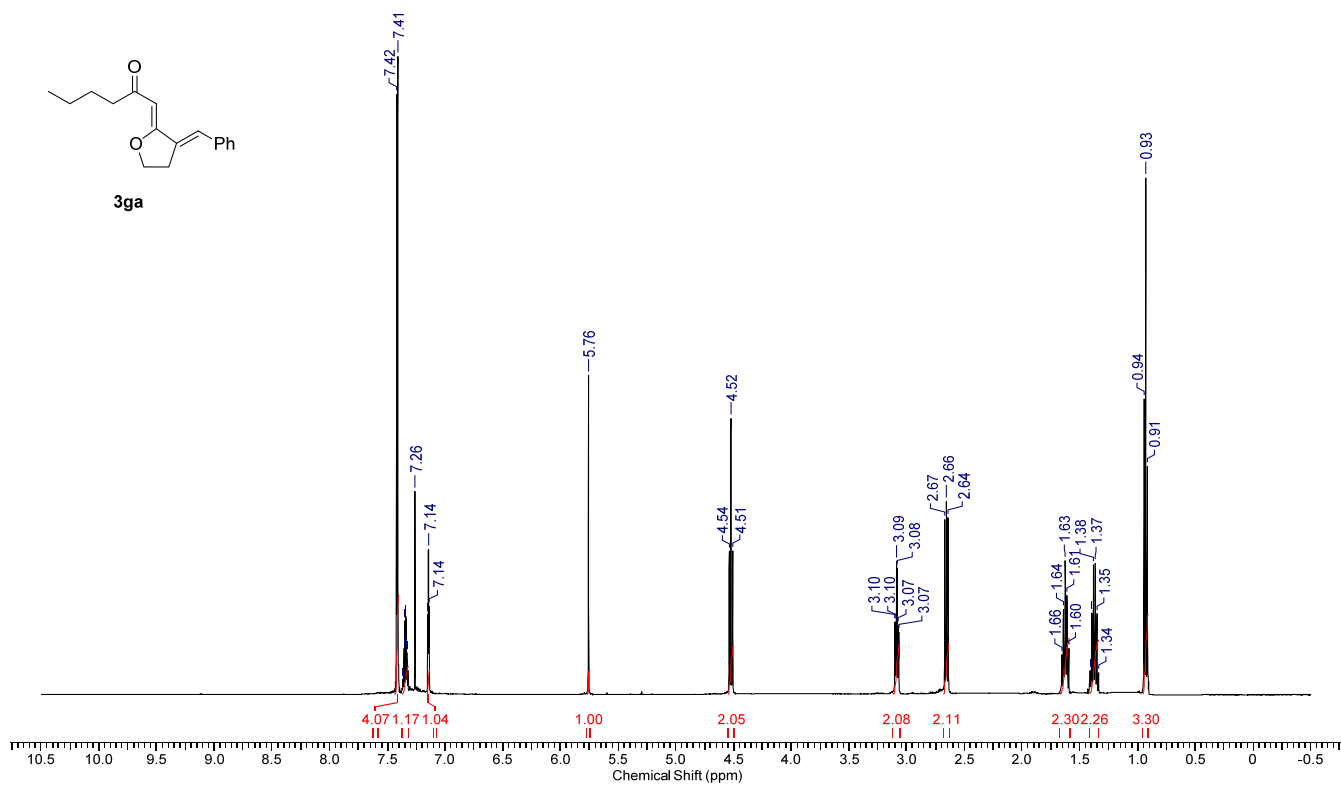 $^{13}\text{C}$  NMR of **3ga**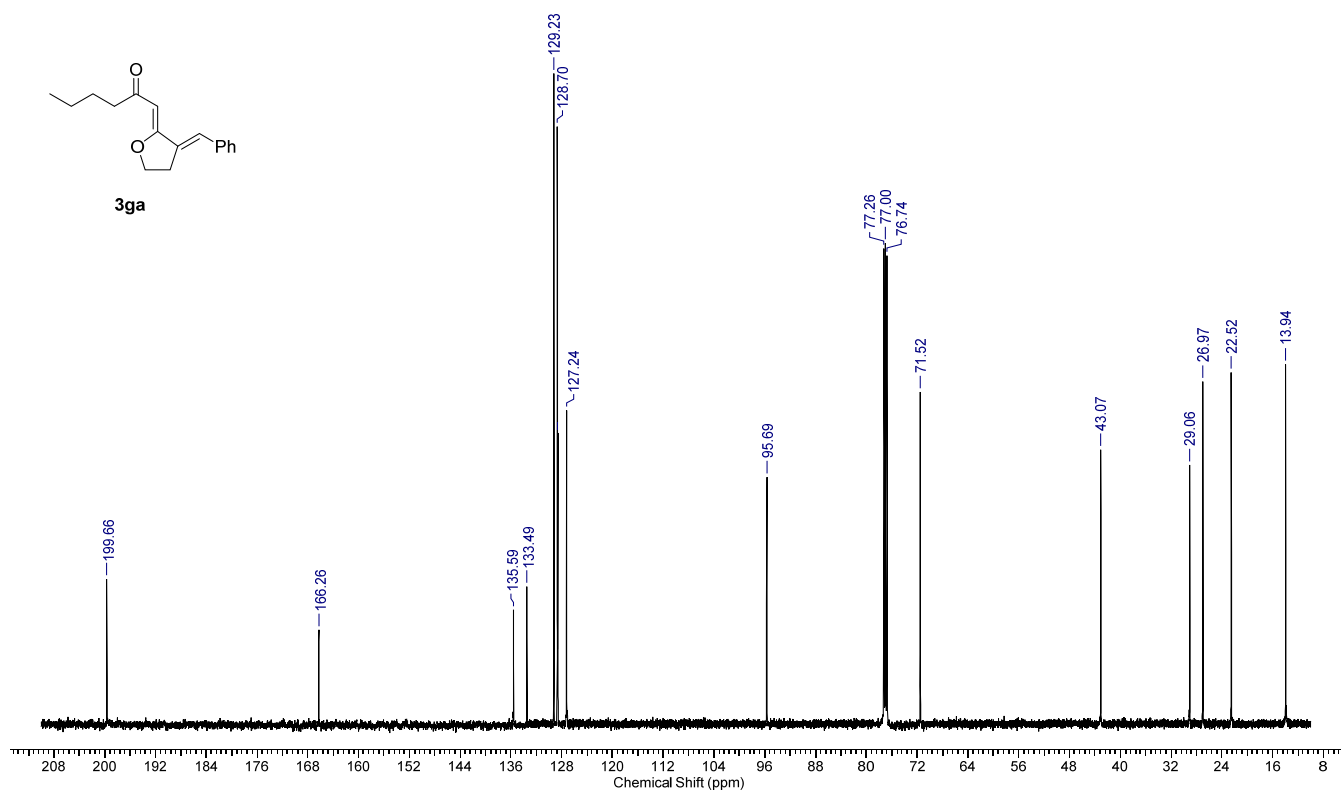

<sup>1</sup>H NMR of **4da**

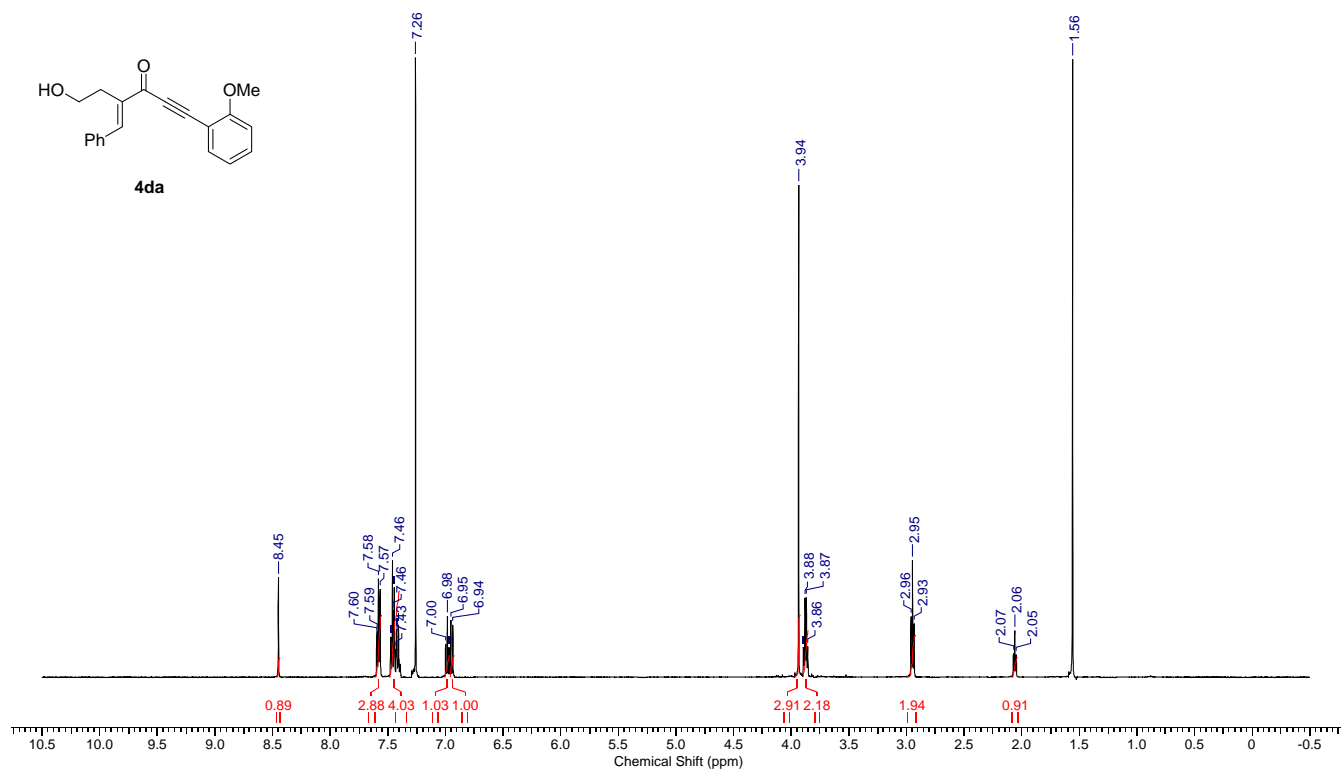

<sup>13</sup>C NMR of **4da**

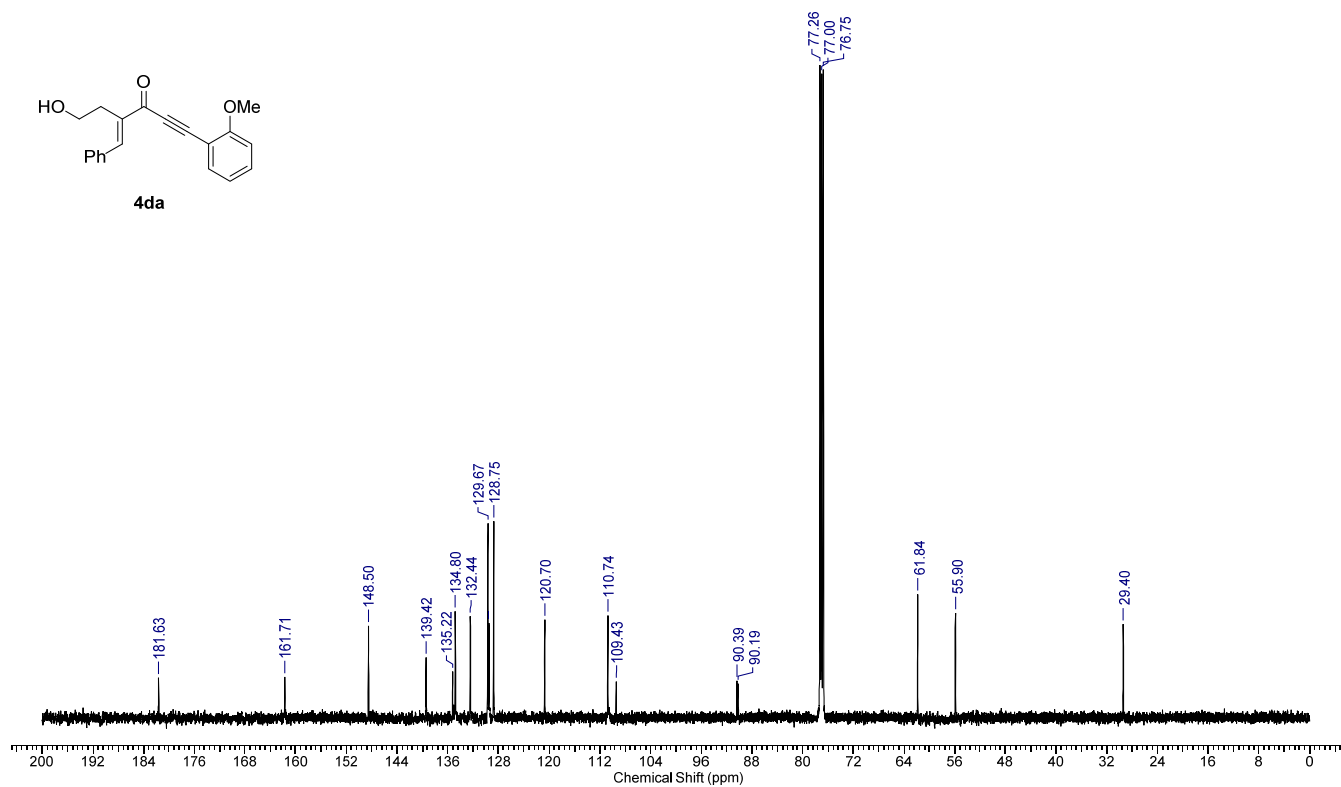

<sup>1</sup>H NMR of **4aa**

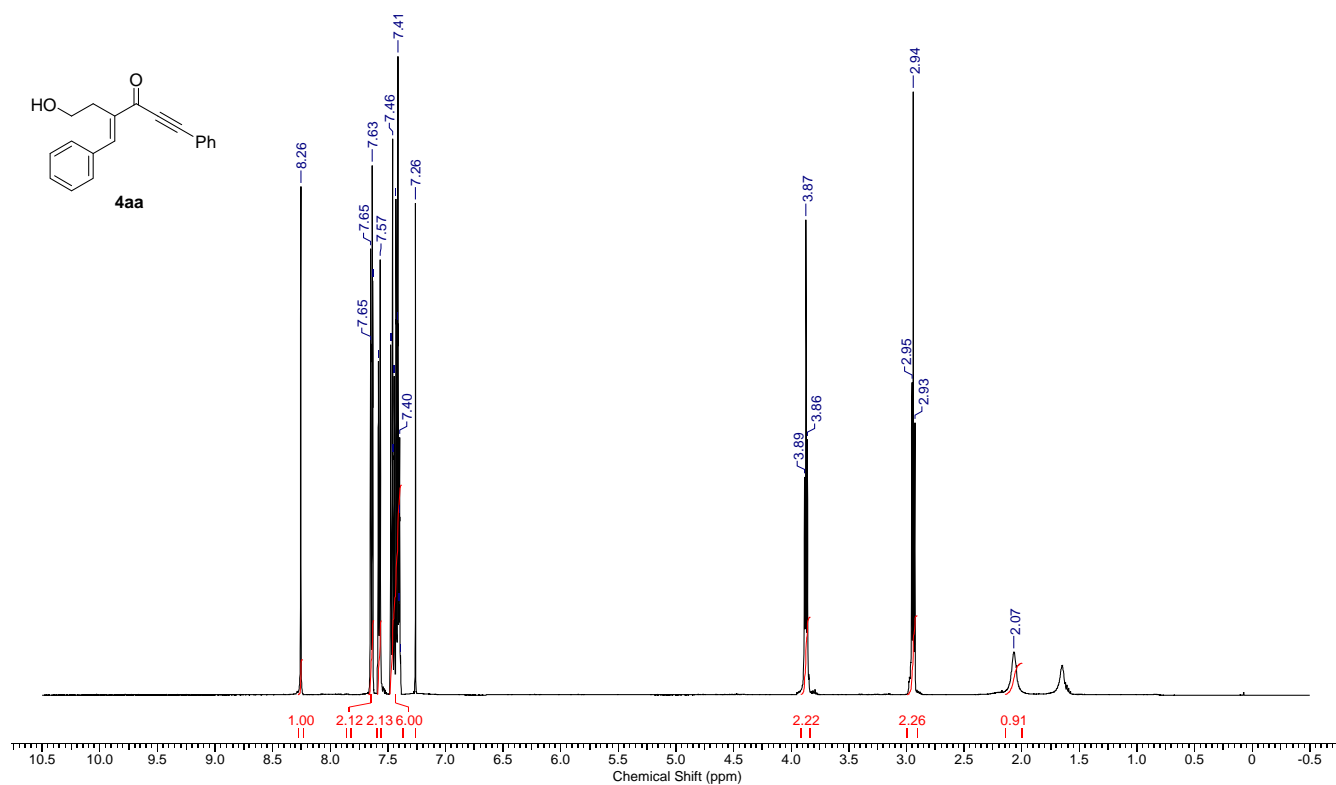

<sup>13</sup>C NMR of **4aa**

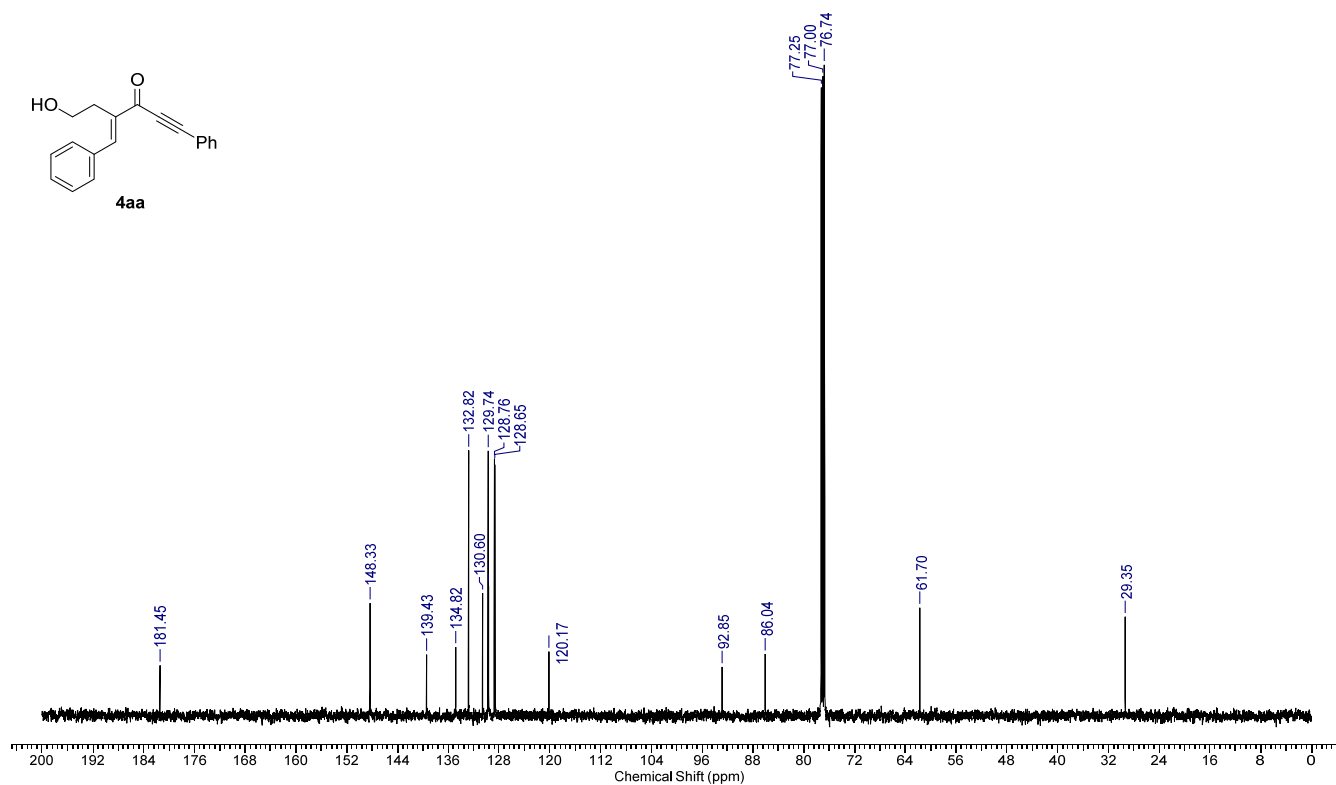

<sup>1</sup>H NMR of **4aj**

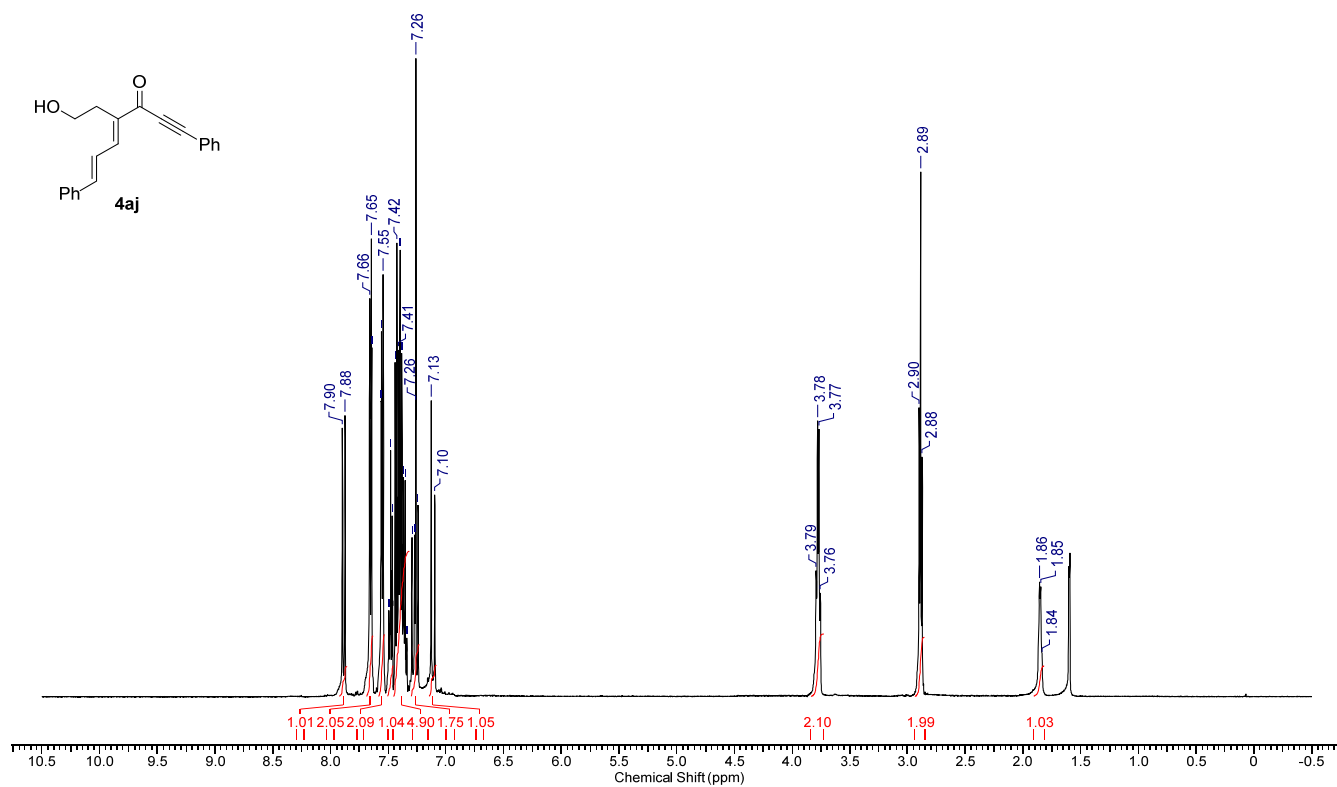

<sup>13</sup>C NMR of **4aj**

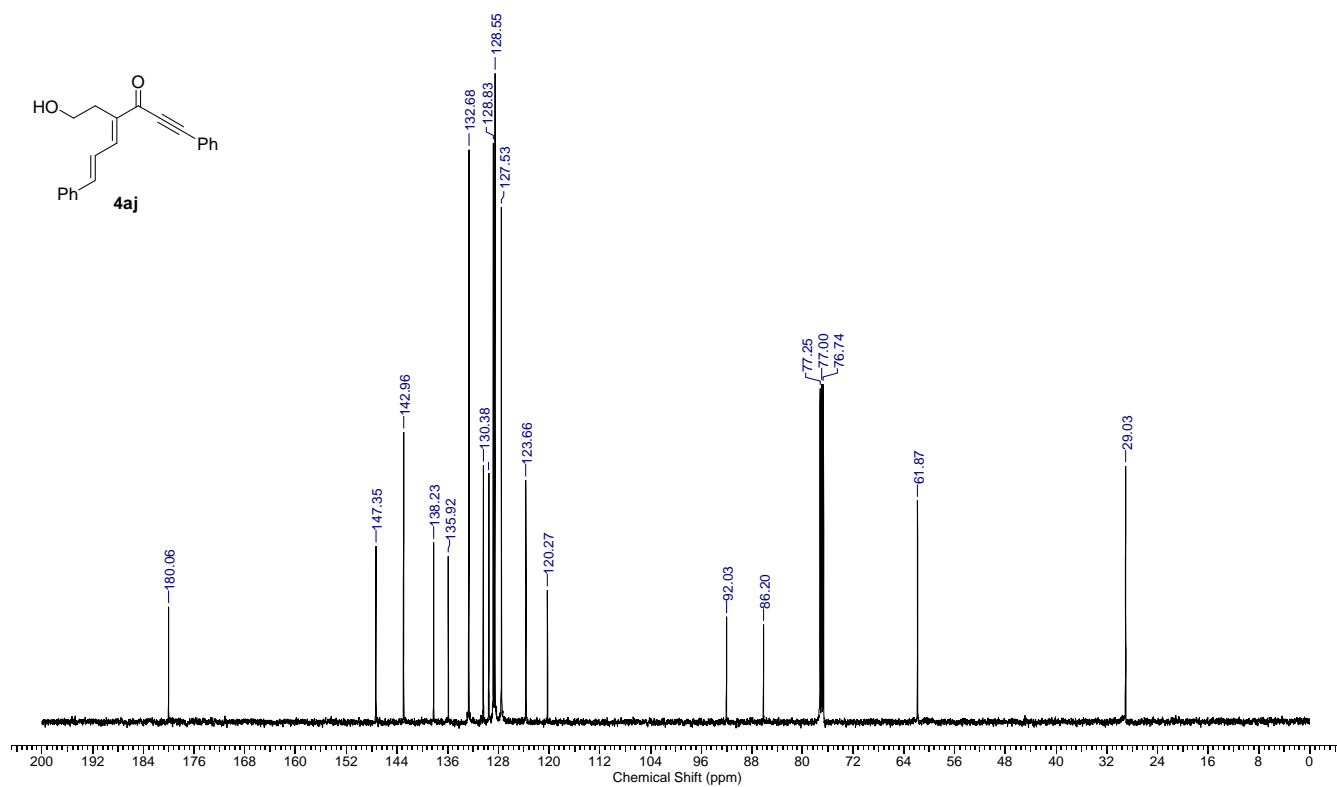



<sup>1</sup>H NMR of **4ak**

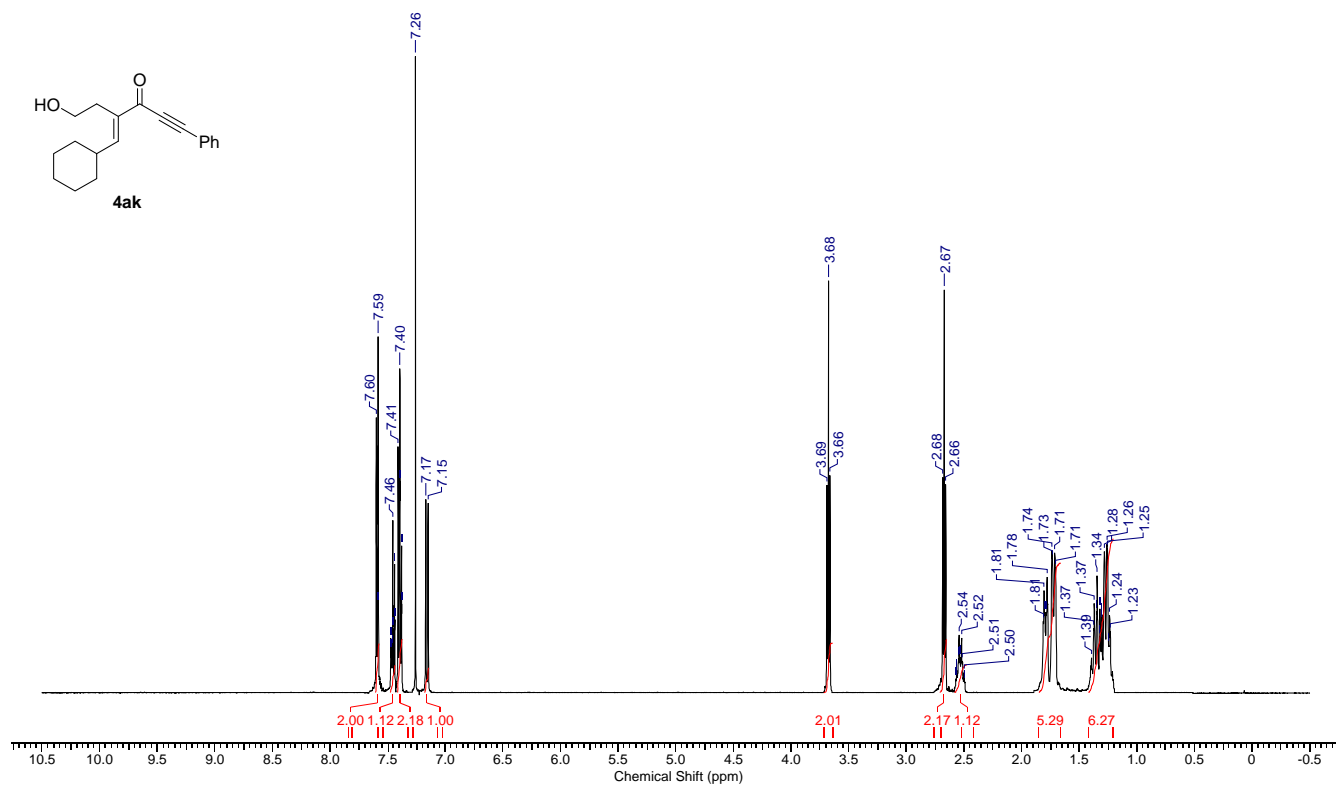

<sup>13</sup>C NMR of **4ak**

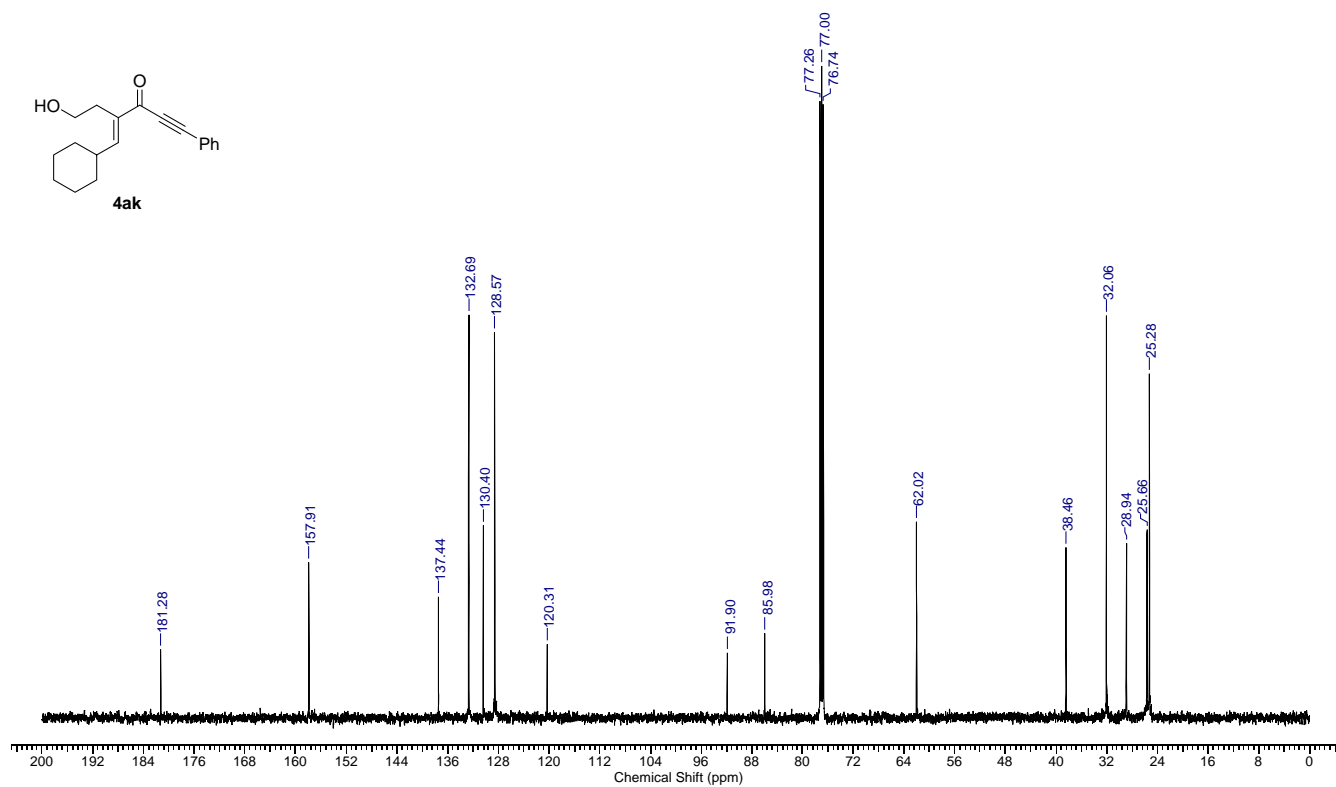

<sup>1</sup>H NMR of **5**

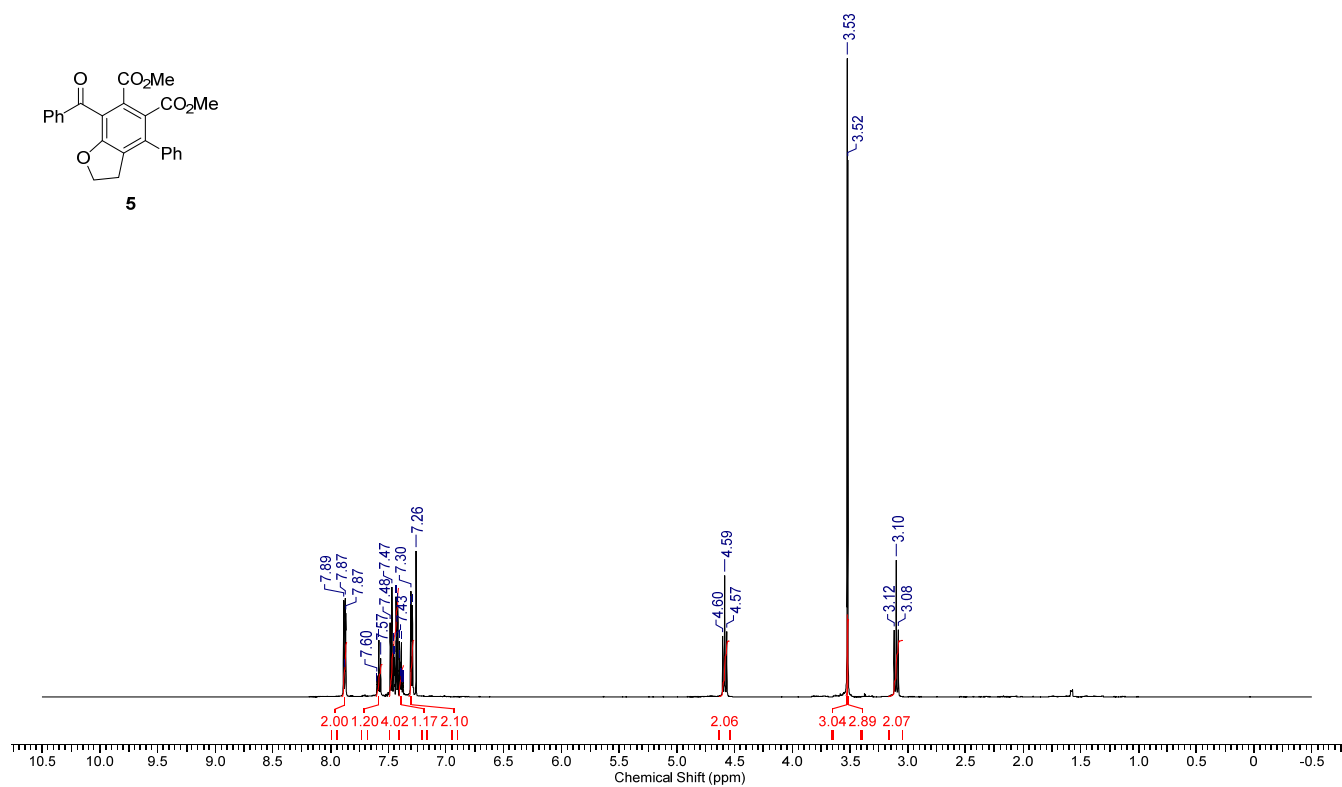

<sup>13</sup>C NMR of **5**

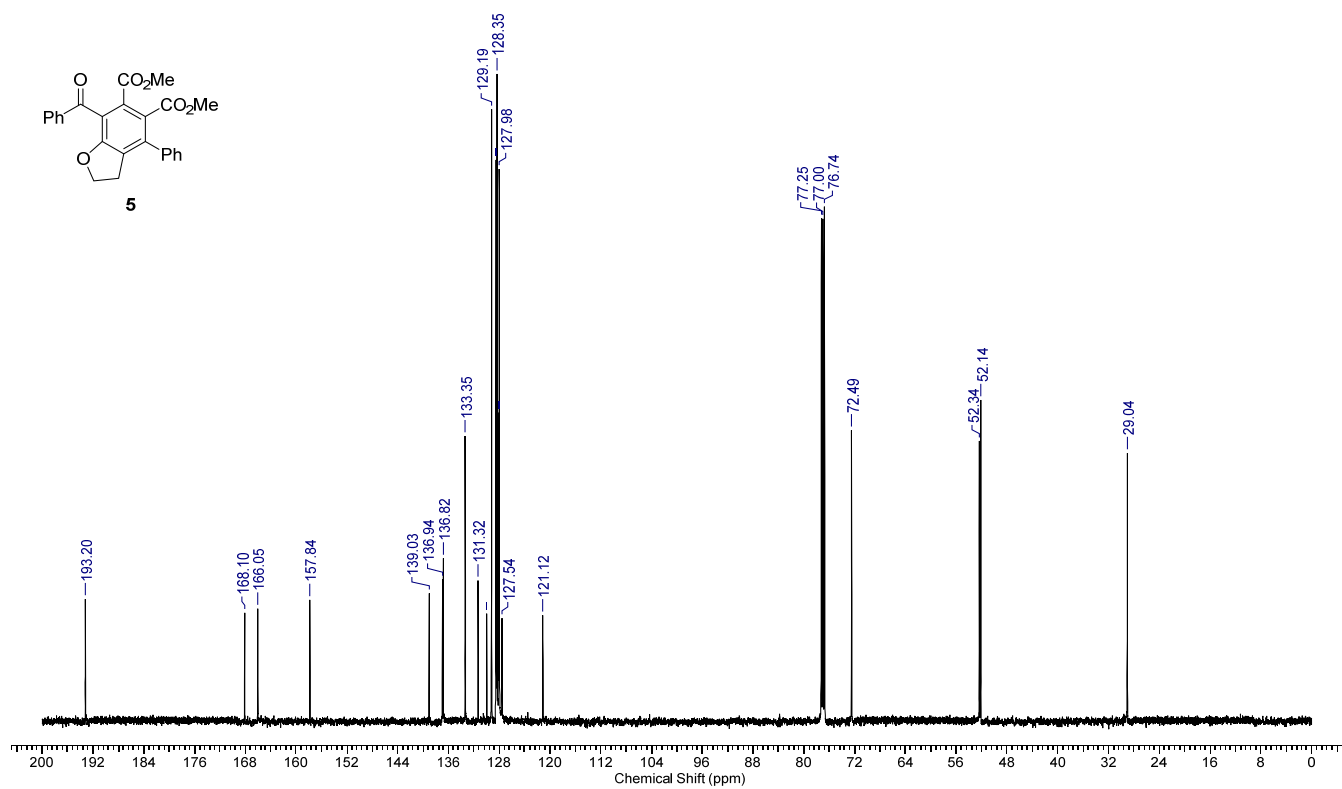

<sup>1</sup>H NMR of **8**

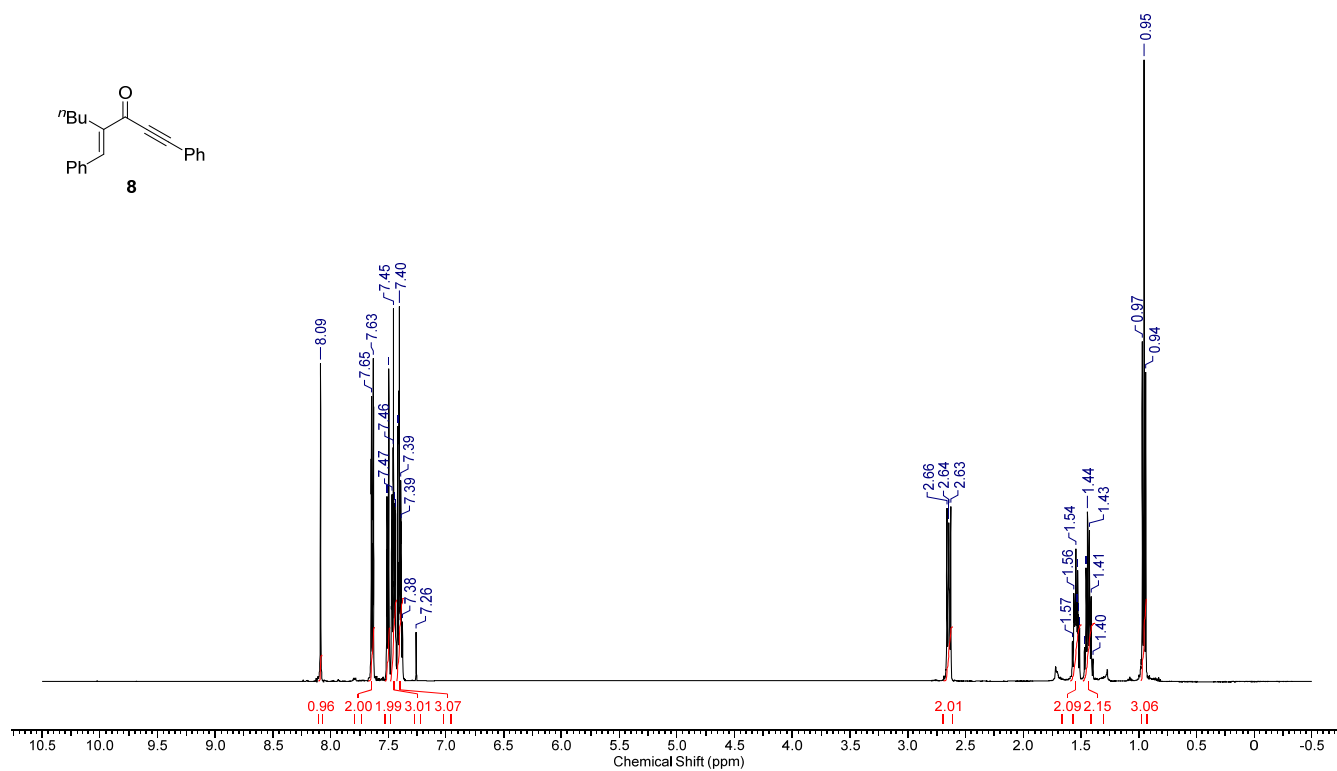

<sup>13</sup>C NMR of **8**

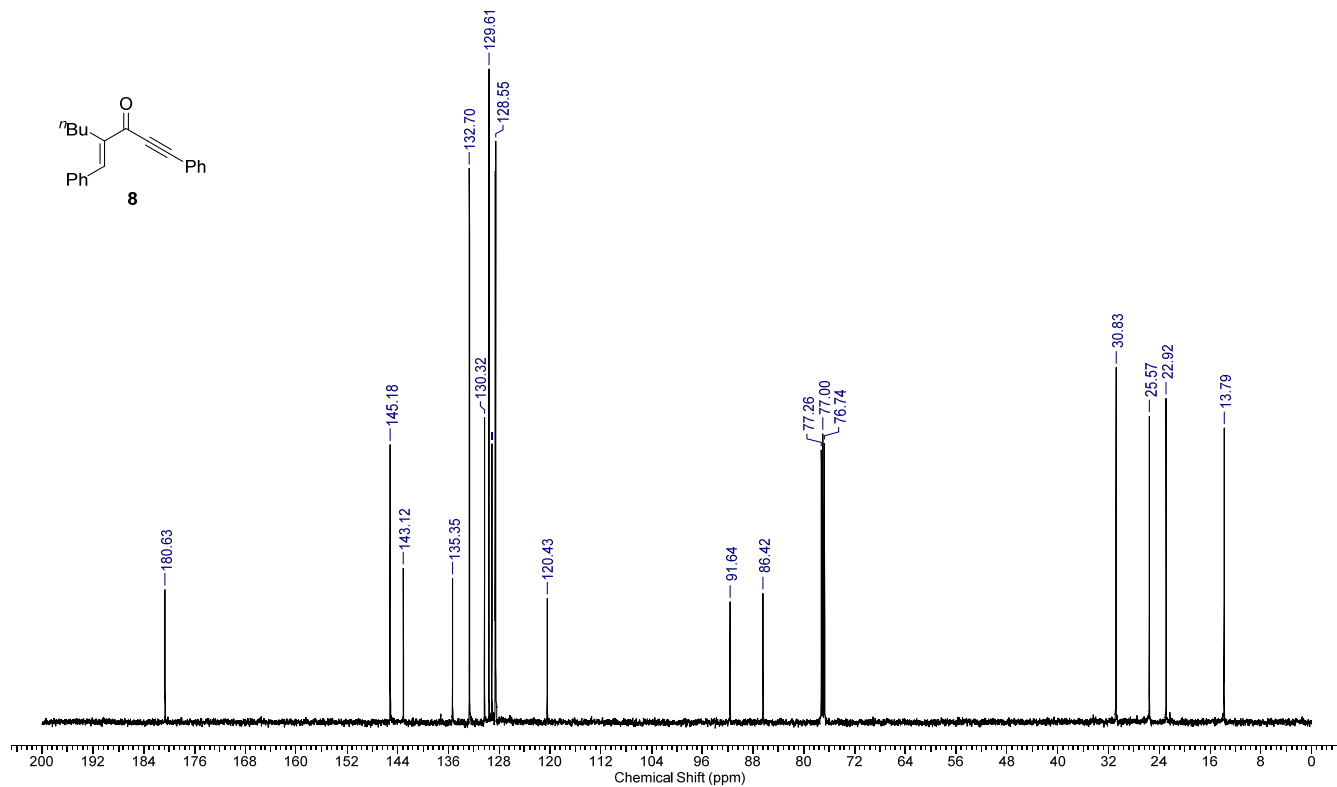

Supplement: Supplementary file 1 [file 12500246]
